# Supplementary material
Source: PubMed Central journal article supplement (PMC5973552)
Supplement: NIHMS965475-supplement-Supplementary_File.pdf [file NIHMS965475-supplement-Supplementary_File.pdf]

# **Co-culture of Marine Invertebrate-Associated Bacteria and Interdisciplinary Technologies Enable Biosynthesis and Discovery of a New Antibiotic, Keyicin**

Navid Adnani,<sup>1</sup> Marc G. Chevrette,<sup>2,3</sup> Srikar N. Adibhatla,<sup>1</sup> Fan Zhang,<sup>1</sup> Qing Yu,<sup>1</sup> Doug R. Braun,<sup>1</sup> Justin Nelson,<sup>4</sup> Scott W. Simpkins,<sup>4</sup> Bradon R. McDonald,<sup>2</sup> Chad L. Myers,<sup>4,5</sup> Jeff S. Piotrowski,<sup>6</sup> Christopher J. Thompson,<sup>7</sup> Cameron R. Currie,<sup>2</sup> Lingjun Li,<sup>1</sup> Scott R. Rajski,<sup>1</sup> Tim S. Bugni<sup>1,\*</sup>

<sup>1</sup> Pharmaceutical Sciences Division, School of Pharmacy, University of Wisconsin, Madison, Wisconsin 53705, United States

<sup>2</sup> Department of Bacteriology, University of Wisconsin, Madison, Wisconsin 53705, United States

<sup>3</sup> Department of Genetics, University of Wisconsin, Madison, Wisconsin 53705, United States

<sup>4</sup> Bioinformatics and Computational Biology Program, University of Minnesota-Twin Cities, Minneapolis, Minnesota 55455, United States

<sup>5</sup> Department of Computer Science and Engineering, University of Minnesota-Twin Cities, Minneapolis, Minnesota 55455, United States

<sup>6</sup> Yumanity Therapeutics, Cambridge, Massachusetts 02139, United States

<sup>7</sup> Bruker Daltonics, Billerica, Massachusetts 01821, United States

## Table of Contents

|                                                                                                                                                                                               |                |
|-----------------------------------------------------------------------------------------------------------------------------------------------------------------------------------------------|----------------|
| <b>Experimental Procedures and key data interpretations (with referencing)</b> .....                                                                                                          | <b>S3-S13</b>  |
| <b>Figure S1.</b> Ultra-high resolution FT-ICR mass spectrum for the $[M+2H]^{2+}$ ion of $C_{75}H_{108}N_4O_{34}$ .....                                                                      | <b>S14</b>     |
| <b>Figure S2.</b> Isotopic fine structure analysis confirming the molecular formula of <b>1</b> .....                                                                                         | <b>S15</b>     |
| <b>Figure S3.</b> Extracted ion chromatograms of crude LCMS spectra for both monocultures and co-culture fermentations.....                                                                   | <b>S16</b>     |
| <b>Figure S4.</b> Dynamics of keyicin production between microscale (500 $\mu$ L) and standard scale (100 mL) cultures. ....                                                                  | <b>S16</b>     |
| <b>Table S1.</b> Summary of $^1H$ and $^{13}C$ NMR data for keyicin ( <b>1</b> ).....                                                                                                         | <b>S17-S19</b> |
| <b>Table S2.</b> Results of U- $^{13}C$ glucose media study for keyicin production.....                                                                                                       | <b>S20</b>     |
| <b>Figure S5.</b> WMMB235 and WMMA185 co-culture analyses for seven different media conditions containing U- $^{13}C$ glucose.....                                                            | <b>S20</b>     |
| <b>Figure S6.</b> $^1H$ NMR (600 MHz $CD_3OD$ ) of <b>1</b> .....                                                                                                                             | <b>S21</b>     |
| <b>Figure S7.</b> $^{13}C$ NMR (125 MHz $CD_3OD$ ) of <b>1</b> .....                                                                                                                          | <b>S22</b>     |
| <b>Figure S8.</b> 2D COSY NMR (600 MHz $CD_3OD$ ) of <b>1</b> .....                                                                                                                           | <b>S23</b>     |
| <b>Figure S9.</b> 2D HSQC NMR (600 MHz $CD_3OD$ ) of <b>1</b> .....                                                                                                                           | <b>S24</b>     |
| <b>Figure S10.</b> 2D HMBC NMR (600 MHz $CD_3OD$ ) of <b>1</b> .....                                                                                                                          | <b>S25</b>     |
| <b>Figure S11.</b> 2D ROESY NMR (600 MHz $CD_3OD$ ) of <b>1</b> .....                                                                                                                         | <b>S26</b>     |
| <b>Figure S12.</b> $^{13}C$ - $^{13}C$ COSY NMR (125 MHz, $CD_3OD$ ) of $^{13}C$ -labeled keyicin.....                                                                                        | <b>S27</b>     |
| <b>Figure S13.</b> Sugar S1 characterization using molecular modeling and DFT calculations.....                                                                                               | <b>S28</b>     |
| <b>Figure S14.</b> Sugar S2 characterization using molecular modeling and DFT calculations.....                                                                                               | <b>S29</b>     |
| <b>Figure S15.</b> Sugar S3 characterization using molecular modeling and DFT calculations.....                                                                                               | <b>S30</b>     |
| <b>Figure S16.</b> Sugar S4 characterization using molecular modeling and DFT calculations.....                                                                                               | <b>S31</b>     |
| <b>Figure S17.</b> Sugar S5 characterization using molecular modeling and DFT calculations.....                                                                                               | <b>S32</b>     |
| <b>Figure S18.</b> Sugar S6 characterization using molecular modeling and DFT calculations.....                                                                                               | <b>S33</b>     |
| <b>Figure S19.</b> Sugar S7 characterization using molecular modeling and DFT calculations.....                                                                                               | <b>S34</b>     |
| <b>Figure S20.</b> Characterization of keyicin aglycone using molecular modeling and DFT calculations.....                                                                                    | <b>S35</b>     |
| <b>Figure S21.</b> Structures of biosynthetically similar NPs cinerubin B, cosmomycin D, arimetamycin, kosinostatin and aclacinomycin.....                                                    | <b>S36</b>     |
| <b>Figure S22.</b> Heat map depicting clustered chemical genomics profile generated using barcoded <i>E. coli</i> deletion collection.....                                                    | <b>S37</b>     |
| <b>Table S3.</b> Summary of BGC genes identified in <i>Micromonospora</i> sp. WMMB-235 with proposed roles in keyicin biosynthesis on basis of comparisons to nogalamycin BGC components..... | <b>S38</b>     |
| <b>Table S4.</b> Selected GTs from anthracycline BGCs with similarity to putative <i>kyc</i> GTs                                                                                              | <b>S39</b>     |
| <b>Table S5.</b> Overview of overall cluster similarities between <i>kyc</i> BGC and other anthracycline family members.....                                                                  | <b>S39</b>     |
| <b>Table S6.</b> Summary of average chemical genomic profiles for keyicin versus ethidium bromide and methylmethanesulfonate.....                                                             | <b>S40-S94</b> |
| <b>Table S7.</b> Summary of significantly sensitive <i>E. coli</i> mutant strains identified in chemical genomic screens with keyicin, ethidium bromide and methylmethanesulfonate.....       | <b>S95-126</b> |

## EXPERIMENTAL PROCEDURES

### Bacterial Strain Cultivation

Strains WMMB-235 and WMMA-185 were isolated from marine ascidian (*Ecteinascidia turbinata*) and sponge (*Chondrilla nucula*) specimens, respectively, from the Florida Keys, FL USA.<sup>1, 2</sup> Voucher specimens of both ascidians and sponges used in this study were housed at the University of Wisconsin-Madison. For cultivation, a sample of invertebrate (1 cm<sup>3</sup>) was rinsed with sterile seawater, macerated with a sterile pestle in a microcentrifuge tube, and diluted with sterile seawater. Each dilution was plated separately on three media: ISP2 (4 g yeast extract, 10 g malt extract and 4 g dextrose per liter of artificial seawater), R2A (0.5g yeast extract, 0.5g peptone, 0.5 g casamino acids, 0.5 g dextrose, 0.5 g soluble starch, 0.3 g sodium pyruvate, 0.3 g K<sub>2</sub>HPO<sub>4</sub>, 0.05 g MgSO<sub>4</sub>, 15 g Agar in 1 L ASW), and M4 (0.1 g L-asparagine, 0.5 g K<sub>2</sub>HPO<sub>4</sub>, 0.001 g FeSO<sub>4</sub>, 0.1 g MgSO<sub>4</sub>, 2 g peptone, 4 g sodium propionate, 20 g NaCl, 15 g Agar into 1 L ddH<sub>2</sub>O). Each medium was supplemented with 50 µg/mL cycloheximide and 25 µg/mL nalidixic acid and incubated at 28 °C for at least 28 d. Nearly full length 16S rDNA sequencing was performed using previously described protocols.<sup>3</sup> Bacterial samples generated in this fashion were subsequently subjected to previously described microscale fermentation and extraction procedures<sup>4</sup> ultimately leading to the identification of antibacterial activities reflective of keyicin production.

### Antibiotic Activity Screening

Supernatant from culture plates were tested against *B. subtilis*, *E. coli*, Methicillin-sensitive *S. aureus* (MSSA), *P. aeruginosa*, and *S. cerevisiae* using an agar-based antibiotic assay. Methods were modified from a previously reported yeast halo assay.<sup>5</sup> Seed cultures of each screening strain were grown overnight in 10 mL of LB media (10g Tryptone, 5 g Yeast extract, 10 g NaCl into 1 L ddH<sub>2</sub>O)(25 x 150 mm tubes). To prepare uniform lawns for screening, 400 µL of overnight culture was inoculated into 200 mL of cation-adjusted Mueller-Hinton agar (CAMHA) (1.5 g soluble starch, 17.5 g casein, 3 g beef extract, 15 g agar, 12.5 mg Mg<sup>2+</sup> and 25 mg Ca<sup>2+</sup> in 1 L milli-Q H<sub>2</sub>O) and maintained at 50–55 °C. For each screening plate, 30 mL of inoculated agar was poured into OmniTray (Thermo Scientific, Waltham, MA) and cooled for 30 min. From 96-well format, 5 µL of extract was spotted onto the agar. Screening plates were incubated at 37 °C overnight and subsequently visually observed for zones of inhibition.

### Sample Processing for UHPLC/HRESI-qTOF-MS Analysis of Extracts

Half of the total crude extract was split into a designated plate for chemical analysis. A solution of 10:1 H<sub>2</sub>O:MeOH (250 µL) was added to each well containing dried extracts. Solubilized extracts were transferred to 1 dram vials and diluted to a final volume of 1 mL using 10:1 H<sub>2</sub>O:MeOH. Using a Gilson GX-271 liquid handling system, 900 µL was subjected to automated solid phase extraction (SPE). Extracts were loaded onto pre-conditioned (1 mL MeOH followed by 1 mL H<sub>2</sub>O) EVOLUTE ABN SPE cartridges (25 mg absorbent mass, 1 mL reservoir volume; Biotage,

Charlotte, NC). Samples were subsequently washed using H<sub>2</sub>O (1 mL) to remove media components, and eluted with MeOH (500  $\mu$ L) directly into an LC/MS-certified vial.

### UHPLC/HRESI-qTOF-MS Analysis of Extracts

LC/MS data were acquired using a Bruker MaXis ESI-qTOF mass spectrometer (Bruker, Billerica, MA) coupled with a Waters Acquity UPLC system (Waters, Milford, MA) operated by Bruker Hystar software. A gradient comprised of MeOH and H<sub>2</sub>O (containing 0.1% formic acid) was used on an RP C-18 column (Phenomenex Kinetex 2.6 $\mu$ m, 2.1  $\times$  100 mm; Phenomenex, Torrance, CA) at a flow rate of 0.3 mL/min. The method consisted of a linear gradient from MeOH/ H<sub>2</sub>O (10%/90%) to MeOH/ H<sub>2</sub>O (97%/3%) in 12 min, then held for 2 min at MeOH/ H<sub>2</sub>O (97%/3%). Full scan mass spectra (*m/z* 150–1550) were measured in positive ESI mode. The mass spectrometer was operated using the following parameters: capillary, 4.5 kV; nebulizer pressure, 1.2 bar; dry gas flow, 8.0 L/min; dry gas temperature, 205  $^{\circ}$ C; scan rate, 2 Hz. Tune mix (ESI-L low concentration; Agilent, Santa Clara, CA) was introduced through a divert valve at the end of each chromatographic run for automated internal calibration. Bruker DataAnalysis 4.2 software was used for analysis of chromatograms.

### PCA of LC/MS Data

Peak picking and bucketing (table generation) of LC/MS data and PCA was performed using Bruker ProfileAnalysis 2.0 software. These methods and supporting procedures have been previously described.<sup>6</sup>

### Isolation of Keyicin (1)

A total of 10 L (20  $\times$  500 mL) of co-culture were grown in ASW-D medium (2 g yeast extract, 5 g malt extract and 2 g dextrose in 1 L ASW) for 14 d. Unfiltered cultures were extracted with CHCl<sub>3</sub> (3 times using 1:1 ratio). The CHCl<sub>3</sub> extract (1.4 g) was subjected to benchtop C18 column fractionation (MeOH: H<sub>2</sub>O, 10%-100%, 10% increments). A portion (18 mg of 599 mg) of the material containing **1** (60-80% MeOH: H<sub>2</sub>O) was subjected to RP HPLC (60/40% to 100/0% MeOH-ammonium acetate 10 mM in 35 min) using a Phenomenex Luna Phenyl-hexyl column (250  $\times$  10 mm, 5  $\mu$ m). Fractions containing **1** (9 mg) were subjected to RP HPLC (60/40% to 90/10% MeOH-ammonium acetate 10 mM in 90 min) using Phenomenex Luna C18 column (250  $\times$  10 mm, 5  $\mu$ m). Fractions containing **1** (6 mg) were subjected to RP HPLC (70/30% to 80/20% MeOH-ammonium acetate 10 mM in 90 min) using Phenomenex Luna C18 column (250  $\times$  10 mm, 5  $\mu$ m) and yielded **1** (3.7 mg, RT 27 min).

**Keyicin (1):** Red solid;  $[\alpha]^{25}_{\text{D}} + 20$  (*c* 0.1, MeOH); UV (MeOH)  $\lambda$  (log  $\epsilon$ ) 206 (3.54), 237 (3.59), 260 (3.28), 293(2.91), 480 (3.08); IR (ATR)  $\nu_{\text{max}}$  3207, 3060, 2940, 2835, 2360, 2341, 2162, 1900, 1664, 1547, 1404, 1342, 1284, 1253, 1017, 926  $\text{cm}^{-1}$ ; <sup>1</sup>H and <sup>13</sup>C NMR (See Supporting Information, **Table S1**); HRMS [M+2H]<sup>2+</sup> *m/z* 805. 34954 (calcd for C<sub>75</sub>H<sub>108</sub>N<sub>4</sub>O<sub>34</sub>, 805.34954).

### **FT-ICR Analysis**

The provided sample was re-dissolved in 100 mL MeOH. A 10 mL aliquot of this solution was diluted in MeOH:H<sub>2</sub>O:Formic Acid (1:1:0.1) to a final volume of 1 mL. Additionally, 10 mL of a 10 mg/mL Arginine solution was spiked into the final dilution. FT-ICR MS data was acquired using a 12T solariX-XR Fourier transform ion cyclotron resonance (ICR) mass spectrometer (Bruker, Billerica, MA). The mass spectrum was measured in broadband mode over  $m/z$  350-5,000 using positive ESI mode. Data was collected using 16 MW data points, summed over 300 scans and post-processed into absorption mode. The data was internally re-calibrated using the spiked-in Arginine clusters, with a standard deviation of <15 ppb. The doubly charged monoisotopic peak was observed at  $m/z$  805.34955 with a resolving power of 2,190,560. At this resolution, isotopic fine structure was easily observed in the A+1, A+2, A+3 and A+4 isotopes.

### **Media Study**

Media study was performed using ASW-A (20 g soluble starch, 10 g glucose, 5 g peptone, 5 g yeast extract, 5 g CaCO<sub>3</sub> per liter of ASW), ASW-D (2 g yeast extract, 5 g malt extract and 2 g dextrose per liter of ASW), ISP2 (4 g yeast extract, 10 g malt extract and 4 g dextrose per liter of artificial seawater), and M1 (10 g soluble starch, 2 g peptone and 4 g yeast extract per liter ASW) media. Cultures (500  $\mu$ L) were grown in detoxified polypropylene square 96-deepwell microplates (EnzyScreen, The Netherlands).

### **Cell Contact Study**

Baffled Erlenmeyer flasks (500 mL) were customized to interconnect with each other. A 0.2  $\mu$ m nylon filter was placed between the flasks. One flask was inoculated with 3 mL of WMMB-235 (*Micromonospora* sp.) in 100 mL of ASW-D and the other connected flask was inoculated with 1 mL of WMMA-185 (*Rhodococcus* sp.) in 100 mL of ASW-D (recipe above). Cultures were grown for 7 d at 30 °C and 200 rpm. A 1 mL aliquot was removed from each side of the modified fermentation system daily for LC/MS analysis. Another 1 mL aliquot was removed and diluted 1000-fold to assess bacterial growth. From each diluted aliquot, 100  $\mu$ L was transferred to ASW-A agar (recipe above) and incubated for 14 d.

### **Determination of Minimum Inhibitory Concentration (MIC)**

Test organisms *B. subtilis*, *E. coli* (ATCC 25922), and methicillin-sensitive *S. aureus* (MSSA) (ATCC 29213) were sub-cultured overnight on LB agar.<sup>7</sup> Several colonies were transferred to normal saline and adjusted to McFarland values of 0.5 for Gram-positive *B. subtilis* and MMSA, and 1.5-2 for Gram-negative *E. coli*. From each bacterial suspension, 100  $\mu$ L was transferred into 9.9 mL of CAMHB (1.5 g soluble starch, 17.5 g casein, 3 g beef extract, 12.5 mg Mg<sup>2+</sup> and 25 mg Ca<sup>2+</sup> in 1 L milli-Q H<sub>2</sub>O). A total of 50  $\mu$ L diluted bacterial suspension was added to 150  $\mu$ L of CAMHB and treated with test compound. Test compound was dissolved in DMSO, and serially diluted in 10 concentrations (128-0.25  $\mu$ g/mL). Eight untreated media controls were included on each plate.

Plates were incubated at 37 °C for 18 h. The MIC was determined as the lowest concentration that inhibited visible growth of bacteria.

### Elucidation of S1–S7 relative configurations (on basis of NMR data that follow)

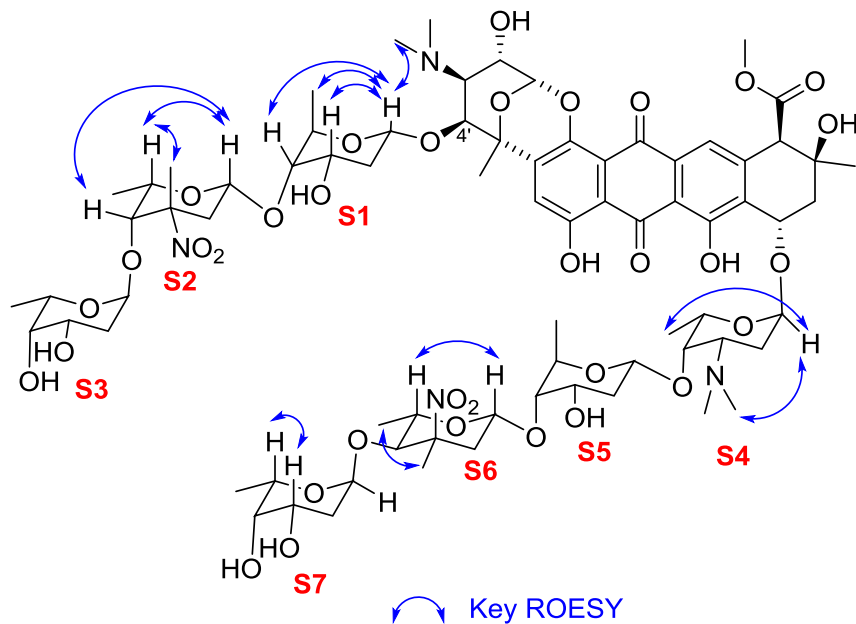

Key ROESY correlations enabling elucidation of sugar configurations are shown above and figured into our stereochemical logic as follows. For S1 ROESY correlations of H-1' with H-3', H-4', and H<sub>3</sub>-6' suggested these protons adopted the same orientations, therefore establishing the relative configuration of S1. On the basis of comparisons of <sup>13</sup>C

chemical shifts between S1 and S5 it could be deciphered that S5 has the same relative configuration as S1.

The relative configuration of S2 was determined by ROESY correlations. The ROESY correlation of H-1' with H-4' and H-5' suggested these protons adopted the same orientations. The ROESY correlation of H<sub>3</sub>-6' with H<sub>3</sub>-7' (the methyl group attached to C-3') placed these protons on the same face of the ring (cis-configured). The relative configurations of S3 and S7 were determined on the basis of comparisons of <sup>13</sup>C chemical shifts with well-established 2-deoxy-L-fucose (deFUC).<sup>8,9</sup>

| position | S1    | S5    |
|----------|-------|-------|
| 1'       | 101.1 | 101.1 |
| 2'       | 34.8  | 35.2  |
| 3'       | 66.3  | 66.3  |
| 4'       | 82.8  | 82.9  |
| 5'       | 68.8  | 68.6  |
| 6'       | 17.3  | 17.4  |

| position | S3    | S7    | deFUC |
|----------|-------|-------|-------|
| 1'       | 102.9 | 103.1 | 99.1  |
| 2'       | 33.8  | 33.8  | 33.0  |
| 3'       | 66.7  | 66.7  | 65.9  |
| 4'       | 72.2  | 72.3  | 71.6  |
| 5'       | 68.7  | 69.1  | 68.4  |
| 6'       | 17.2  | 17.1  | 17.9  |

The relative configuration of S4 was determined on the basis of ROESY correlations and comparison of its  $^{13}\text{C}$  chemical shifts with those of L-Rhodosamine in aclacinomycin A.<sup>10</sup> ROESY correlations of H-1' with H-6' and H<sub>3</sub>-NCH<sub>3</sub> revealed their spatial proximity. The stereogenic center at C-4' was determined by comparison of its  $^{13}\text{C}$  chemical shifts with those of aclacinomycin A.

| position         | S4    | L-Rhodosamine |
|------------------|-------|---------------|
| 1'               | 101.9 | 101.6         |
| 2'               | 30.1  | 29.3          |
| 3'               | 63.9  | 61.6          |
| 4'               | 75.5  | 74.1          |
| 5'               | 69.9  | 66.8          |
| 6'               | 18.5  | 17.0          |
| NCH <sub>3</sub> | 44.6  | 43.3          |

The relative configuration of S6 was determined by ROESY correlations and comparison of its  $^{13}\text{C}$  chemical shifts with those of L-decilonitrose (DEC) in arugomycin.<sup>8,9</sup> The ROESY correlations of H-1' with H<sub>3</sub>-6', and H<sub>3</sub>-6' with H<sub>3</sub>-7' (the methyl group attached to C-3') placed these protons on the same face of the ring.

The stereogenic center at C-4' was determined on the basis of comparison of its  $^{13}\text{C}$  chemical shifts with L-decilonitrose (DEC) in arugomycin.

| position        | S6    | DEC  |
|-----------------|-------|------|
| 1'              | 101.1 | 99.7 |
| 2'              | 42.6  | 41.9 |
| 3'              | 90.3  | 89.5 |
| 4'              | 84.9  | 83.6 |
| 5'              | 71.8  | 70.6 |
| 6'              | 19.0  | 18.6 |
| CH <sub>3</sub> | 25.5  | 24.9 |

### Molecular Modeling and DFT Calculations (as applied to S1–S7 relative configurations)

Molecular modeling calculations were performed on a Dell Precision T5500 Linux workstation with a Xeon processor (3.3 GHz, 6-core). A library of low-energy conformers (MMFF, 10000 conformers examined) was obtained within 10 kcal. Each of the low energy (as determined by molecular mechanics) conformers was subsequently subjected to energy analysis using DFT to establish relative energies for a Boltzmann distribution. For structures that would contribute greater than 5% of the conformer population, NMR calculations were performed (B3LYP/6-31G\*\*) using Spartan '14.<sup>11</sup> Molecules were modeled in the gas phase. Carbon chemical shifts (calculated vs. experimental) were compared using the DP4 probability method.<sup>12</sup> The results of these studies were used to ensure the legitimacy of S1–S7 configurational assignments derived from NMR data.

### Genomic DNA Extraction for PacBio Sequencing

Strains WMMB-235 (*Micromonospora* sp.) and WMMA-185 (*Rhodococcus* sp.) were cultured in ASW-A media at 28 °C and 200 rpm for 10 d. Sufficient culture was centrifuged for 60 s at 14,000 rpm to yield ~100  $\mu\text{L}$  packed cells. Supernatants were discarded and cells were washed with 1 mL of 10.3% sucrose solution. Centrifugation was repeated and cells were resuspended in

450  $\mu$ L TSE containing lysozyme (5 mg/mL). The solution was incubated for one hour, with tubes inverted occasionally, at 37 °C. Proteinase k (20 mg/mL, 13  $\mu$ L) was added and incubated for an additional 20 min at 37 °C. SDS (10%, 45  $\mu$ L) and 180  $\mu$ L of TE was added and tubes were inverted until cells became clear and viscous. Phenol:chloroform:isoamyl alcohol (25:24:1, 350  $\mu$ L) were added and shaken until uniformly cloudy. Tubes were centrifuged at 14,000 rpm for 10 min and the top aqueous layer was collected. DNA was precipitated by first adding 1/10th volume 5 M NaCl and mixing, and then adding an equal volume of 2-propanol and inverting the tube until DNA precipitated. Precipitated DNA was removed using a glass hook and washed in 1 mL 70% EtOH. The solution was centrifuged and excess ethanol was removed. The DNA pellet was resuspended in 500  $\mu$ L TE and 10  $\mu$ L of RNase A (10 mg/ml) prior to incubation at 37 °C for 1 h. 350  $\mu$ L phenol:chloroform:isoamyl alcohol (25:24:1) were added, shaken, and subsequently centrifuged for 10 min at 14,000 rpm. The upper aqueous layer was removed. Extraction was performed using 300  $\mu$ L chloroform and centrifuged at 14,000 rpm for 5 min. The upper aqueous layer was removed. NaCl (5 M, 1/10 volume) was added and tubes were inverted to mix. An equal volume isopropanol was added and tubes were inverted to mix until DNA precipitation was observed. DNA was removed with a glass hook and washed in 1 mL 70% ethanol. DNA was pelleted and excess ethanol was removed. The pellet was allowed to air dry until residual ethanol evaporated. The pellet was resuspended in an appropriate volume of 10mM TRIS. DNA was then cleaned using PowerClean DNA Clean-Up Kit (MoBio, Carlsbad, CA 92010.) as per the manufacturer's protocol. The sequences of both the WMMB-235 and WMMA-185 genomes have been previously reported and are publically available.<sup>1,2</sup>

#### **Bacterial Fermentation for Proteomics Analysis of *Micromonospora*/*Rhodococcus* Co-culture**

Seed cultures of *Micromonospora* sp. (WMMB-235) and *Rhodococcus* sp. (WMMA-185) were initially grown in 10 mL seed cultures (25 x 150 mm tubes) in ASW-D media (2 g yeast extract, 5 g malt extract, 2 g dextrose per liter of artificial seawater). The *Micromonospora* sp. and *Rhodococcus* sp. seed cultures were grown for 3 and 2 d, respectively. Subsequently, *Micromonospora* sp. (3 mL) and *Rhodococcus* sp. (1 mL) were simultaneously inoculated into 100 mL ASW-D in a 500 mL baffled flask. Monoculture and co-cultures were grown in triplicate.

#### **Protein Extraction and Digestion (for Proteomics)**

Following 10 d of fermentation, cultures were centrifuged for 60 min, at 4° C and 3,220 RCF. Cell pellets were suspended in 20 mL of 25 mM Tris-HCl (pH:7.6). Cells were lysed by passing through a French press twice at 1400 kg/cm<sup>3</sup>. Supernatants were split into 1.5 mL microcentrifuge tubes and centrifuged for 45 min at 20,817 RCF at 4 °C. Supernatant of cell lysates were transferred to Amicon Ultra 15 mL Centrifugal Filters with 100,000 MW limit (EMD Millipore) and centrifuged at 3,220 RCF and 5 °C. Lysates were centrifuged in 5-minute intervals and checked until a final volume of 300  $\mu$ L was achieved. For precipitation, 1,200  $\mu$ L ice-cold LC/MS grade acetone was added to the 300  $\mu$ L lysate and set at -20 °C overnight.



Following overnight precipitation, samples were centrifuged for 10 min at 4 °C and 15,000 RCF. The supernatant was discarded and the pellet was washed twice with ice-cold LCMS grade acetone, with centrifugation and discarding of the supernatant each time. Following the final wash, the pellet was dried on ice by opening the cap for exactly 7 min to prevent over drying of the pellet. The pellet was resuspended in 50 mM ammonium bicarbonate (200 µL). 10 µL was removed for protein quantification performed using Bradford Assay. Protein (20 µg) was incubated with 10 mM DTT (1:100) at 37 °C for 30 min. 55 mM IAA was added (1:20) to this solution and incubated for 45 min at 37 °C in the dark. Trypsin was added (1:50, trypsin:protein) and incubated overnight at 37 °C. Samples were dried and resuspended in 0.1% TFA followed by C18 ZipTip (Millipore) sample cleanup according to the manufacturer's protocol.

### **LC/MS Proteomic Analysis of *Micromonospora/Rhodococcus* Co-culture**

Biological triplicate samples were analyzed in duplicate by nano-LC-MS/MS using a Waters nanoAcquity UPLC (Waters, Milford, MA) coupled to a Q-Exactive Orbitrap mass spectrometer (Thermo Fisher Scientific, MA). Solvents used for chromatographic separation were 0.1% formic acid in (A) water and (B) acetonitrile. For each sample, 5 µL was injected onto a Waters Symmetry C18 180 µm × 20 mm trap column with 5 µm particle size at a flow rate of 5 µL/minute for 5 min at 99% A/1% B. Chromatographic separation was performed on a Waters BEH C18 75 µm × 150 mm analytical column with 1.7 µm particle size and 300 Å pore size using a gradient from 3→35% solvent B at 350 nL/minute over the course of 90 min. At 92 min the gradient increased to 95% B and was held for 10 min. At 102 min, the gradient was returned to 3% B to re-equilibrate the column. A 50 min linear gradient blank was run between samples. Peptides were analyzed by data-dependent MS/MS. A top 15 method was used to acquire data. The instrument settings were as follows. Resolution was set to 70,000 for MS scans and 17,500 for the data-dependent MS/MS scans. The MS AGC target was set to 10<sup>6</sup> counts, while MS/MS AGC target was set to 10<sup>5</sup> counts. The MS scan range was from 300→2000 *m/z*. MS scans were recorded in profile mode and MS/MS data was recorded in centroid mode. Dynamic exclusion was set to a repeat count of 1 with a 5 s duration.

### **Proteomics Data Analysis**

Raw LC-MS/MS data was imported into PEAKS Studio (version 7.5) software. The following parameters were used for the PEAKS Studio search; parent mass error tolerance, 25 ppm; fragment mass error tolerance, 0.01 Da; precursor mass search type, monoisotopic; enzyme, trypsin; max missed cleavage, 2; non-specific cleavage, both; fixed modification, carbamidomethylation and variable modification, oxidation. The results were filtered using the following parameters: *de-novo* average local confidence score (ALC) % threshold, 50; protein - 10lgP ≥ 20; FDR, 1.0%, and unique peptides ≥ 1.

### Chemical Genomic Profiling of Keyicin in *E. coli*

Chemical genomic analysis using the barcoded *E. coli* deletion collection<sup>13</sup> was performed as previously described.<sup>14</sup> The pooled deletion collection was grown in triplicate 200  $\mu$ L cultures of LB with either 12.5  $\mu$ g/mL keyicin, 100  $\mu$ g/mL Ethidium bromide (EtBr), 0.0125% methyl methanesulfonate (MMS), or a 1% DMSO solvent control. Cultures were grown for 24 h at 37 °C. After 24 h, genomic DNA was extracted using the Invitrogen PureLink 96-well genomic DNA extraction kit (Cat # K1821-04A). Strain specific barcodes from each culture were amplified using indexed primers designed for multiplexed Illumina sequencing. Barcodes were amplified by PCR, pooled, gel purified, and quantified by qPCR as previously described.<sup>15</sup> For barcode sequencing, samples were run on an Illumina HiSeq2500 in rapid run mode for 50 cycles at a loading concentration of 15 pM. BEANcounter (<https://github.com/csbio>) was used to demultiplex and generate a count matrix and chemical genetic score relative to the solvent control for each strain.<sup>16</sup> The average chemical genomic profiles of the 3 replicates were clustered using Cluster 3.0 and visualized in Java Treeview.<sup>17</sup> Profiles were correlated using SpotFire 7.6 (Tibco, USA). To detect gene mutants that significantly decreased fitness in the presence of the compounds employed (keyicin, EtBr, and MMS), we compared normalized counts to a solvent control *via* EdgeR.<sup>18</sup> Significant genes were selected with a cutoff at  $P_{\text{adj}} < 0.05$ . To detect functional enrichment among the top sensitive strain in the presence of keyicin and their interacting partners, we used GeneMANIA.<sup>19</sup>

The chemical genomic profile of keyicin was distinct from EtBr and MMS (Supporting Information, Figure S22). The profiles of EtBr and MMS had a correlation coefficient of 0.47 whereas keyicin, had correlations of only 0.11 and 0.16 with EtBr and MMS, respectively. In assessing the impact of these agents upon DNA we investigated chemical genetic interactions with mutants of *recA*, a key gene involved in DNA damage repair in *E. coli*. This gene shows strong chemical interactions with DNA damaging agents, and as such, mirrors DNA damage processes.<sup>20</sup> As anticipated, *recA* mutants were significantly depleted in the presence of EtBr (fold change 0.19,  $p=1.45e^{-17}$ ) and MMS (fold change 0.01,  $p=1.3e^{-56}$ ) relative to the solvent (DMSO) control (Supporting Information, Table S6). Notably,  $\Delta recA$  was the most sensitive strain to MMS, and the 16<sup>th</sup> most sensitive to EtBr. Conversely, and consistent with the hypothesis that keyicin does not significantly damage DNA, keyicin had little to no impact on *recA* mutant populations (fold change 0.61,  $p=0.15$ ). Also notable was that  $\Delta rusA$ , a mutant devoid of a critical nuclease involved in DNA repair, was the 7<sup>th</sup> most sensitive strain to EtBr yet was impervious to the effects of keyicin. Importantly, among the 20 most sensitive mutants to keyicin, not a single one bore mutations in DNA replication or repair machineries.

Chemical genomics revealed a total of 46 gene mutants with significant sensitivities to keyicin (Supporting Information, Table S7). We found no significant functional enrichment among these genes to help understand its mode of action. However, when we looked at the network around these genes (including known genetic and physical interactors, genes with shared protein domain, and genes with known co-expression), we found enrichment for fatty acid binding (FDR  $1.17e^{-3}$ ), driven by *gcvH* which has a shared protein domain with the products of *aceF* and *sucB*.<sup>21-</sup>

<sup>23</sup> Furthermore, the  $\Delta fadR$  mutant was the 10<sup>th</sup> most sensitive strain to keyicin exposure. That *fadR*, encodes a regulator of fatty acid metabolism,<sup>24-26</sup> in tandem with findings related to *gcvH* and others, suggests that further studies into keyicin's impact on bacterial lipid metabolism are clearly warranted and likely to shed light on this novel anthracycline's mechanism of antibacterial action.

### Amplified <sup>13</sup>C Incorporation During Keyicin Biosynthesis

Incorporation of isotopically labeled U-<sup>13</sup>C glucose was necessary to ultimately carry out 2D <sup>13</sup>C-<sup>13</sup>C experiments on keyicin. This also was the case in order to visualize all <sup>13</sup>C resonances in a 1D spectrum. Simple substitution of U-<sup>13</sup>C glucose for glucose in ASW-A media yielded <sup>13</sup>C-<sup>13</sup>C COSY data with correlations between each aromatic carbon and only one neighboring carbon atom. The lack of a carbon-carbon spin system in the <sup>13</sup>C-<sup>13</sup>C COSY data indicated either the presence of heteroatoms or insufficient <sup>13</sup>C incorporation into **1**. Based on the aforementioned justification for a polycyclic aromatic core, it was apparent that the lack of detectable carbon-carbon connectivity could be attributed to insufficient isotope incorporation. Consequently, <sup>13</sup>C incorporation was optimized on the basis of a media study looking at keyicin generation in seven isotopically enriched media (Supporting Information, Table S2). The efficiency of <sup>13</sup>C incorporation was evaluated on the basis of both mass shifts and isotopic distributions as determined using HRMS (Supporting Information, Figure S5). Notably, a primary component of ASW-D media, malt extract, was found to compete with U-<sup>13</sup>C glucose as a carbon source thereby decreasing <sup>13</sup>C incorporation efficiencies. Through the process of trial-and-error, we found that the use of peptone instead of malt extract led to retained keyicin titers while, at the same time, enabling significantly improved U-<sup>13</sup>C glucose incorporation.

### References:

1. Adnani, N.; Braun, D. R.; McDonald, B. R.; Chevrette, M. G.; Currie, C. R.; Bugni, T. S., Draft Genome Sequence of *Micromonospora* sp. Strain WMMB235, a Marine Ascidian-Associated Bacterium. *Genome Announc* **2017**, *5* (2).
2. Adnani, N.; Braun, D. R.; McDonald, B. R.; Chevrette, M. G.; Currie, C. R.; Bugni, T. S., Complete Genome Sequence of *Rhodococcus* sp. Strain WMMA185, a Marine Sponge-Associated Bacterium. *Genome Announc* **2016**, *4* (6).
3. Wyche, T. P.; Hou, Y.; Braun, D.; Cohen, H. C.; Xiong, M. P.; Bugni, T. S., First natural analogs of the cytotoxic thiodepsipeptide thiocoraline A from a marine *Verrucospora* sp. *The Journal of organic chemistry* **2011**, *76* (16), 6542-7.
4. Adnani, N.; Vazquez-Rivera, E.; Adibhatla, S. N.; Ellis, G. A.; Braun, D. R.; Bugni, T. S., Investigation of Interspecies Interactions within Marine *Micromonosporaceae* Using an Improved Co-Culture Approach. *Marine drugs* **2015**, *13* (10), 6082-6098.
5. Gassner, N. C.; Tamble, C. M.; Bock, J. E.; Cotton, N.; White, K. N.; Tenney, K.; St Onge, R. P.; Proctor, M. J.; Giaever, G.; Nislow, C.; Davis, R. W.; Crews, P.; Holman, T. R.; Lokey, R. S., Accelerating the discovery of biologically active small molecules using a high-throughput yeast halo assay. *J Nat Prod* **2007**, *70* (3), 383-90.

6. Adnani, N.; Vazquez-Rivera, E.; Adibhatla, S. N.; Ellis, G. A.; Braun, D. R.; Bugni, T. S., Investigation of Interspecies Interactions within Marine Micromonosporaceae Using an Improved Co-Culture Approach. *Mar Drugs* **2015**, *13* (10), 6082-98.
7. Tenover, F. C.; Moellering, R. C., Jr., The rationale for revising the Clinical and Laboratory Standards Institute vancomycin minimal inhibitory concentration interpretive criteria for *Staphylococcus aureus*. *Clinical infectious diseases : an official publication of the Infectious Diseases Society of America* **2007**, *44* (9), 1208-15.
8. Kawai, H.; Hayakawa, Y.; Nakagawa, M.; Furihata, K.; Seto, H.; Otake, N., Arugomycin, A new anthracycline antibiotic II. Structural elucidation. *J. Antibiot.* **1986**, *40*, 1273–1282.
9. Shimosaka, A.; Kawai, H.; Hayakawa, Y.; Komeshima, N.; Nakagawa, M.; Seto, H.; Otake, N., Arugomycin, A new anthracycline antibiotic III. Biological activities of arugomycin and its analogues obtained by chemical degradation and modification. *J. Antibiot.* **1986**, *40*, 1283–1291.
10. Oki, T.; Kitamura, I.; Matsuzawa, Y.; Shibamoto, N.; Ogasawara, T.; Yoshimoto, A.; Inui, T.; Naganawa, H.; Takeuchi, T.; Umezawa, H., Antitumor anthracycline antibiotics, aclacinomycin A and analogues. II. Structural determination. *J. Antibiot.* **1979**, *32* (8) , 801–819.
11. Shao, Y.; Molnar, L. F.; Jung, Y.; Kussmann, J.; Ochsenfeld, C.; Brown, S. T.; Gilbert, A. T.; Slipchenko, L. V.; Levchenko, S. V.; O'Neill, D. P.; DiStasio, R. A., Jr.; Lochan, R. C.; Wang, T.; Beran, G. J.; Besley, N. A.; Herbert, J. M.; Lin, C. Y.; Van Voorhis, T.; Chien, S. H.; Sodt, A.; Steele, R. P.; Rassolov, V. A.; Maslen, P. E.; Korambath, P. P.; Adamson, R. D.; Austin, B.; Baker, J.; Byrd, E. F.; Dachsel, H.; Doerksen, R. J.; Dreuw, A.; Dunietz, B. D.; Dutoi, A. D.; Furlani, T. R.; Gwaltney, S. R.; Heyden, A.; Hirata, S.; Hsu, C. P.; Kedziora, G.; Khalliulin, R. Z.; Klunzinger, P.; Lee, A. M.; Lee, M. S.; Liang, W.; Lotan, I.; Nair, N.; Peters, B.; Proynov, E. I.; Pieniazek, P. A.; Rhee, Y. M.; Ritchie, J.; Rosta, E.; Sherrill, C. D.; Simmonett, A. C.; Subotnik, J. E.; Woodcock, H. L., 3rd; Zhang, W.; Bell, A. T.; Chakraborty, A. K.; Chipman, D. M.; Keil, F. J.; Warshel, A.; Hehre, W. J.; Schaefer, H. F., 3rd; Kong, J.; Krylov, A. I.; Gill, P. M.; Head-Gordon, M., Advances in methods and algorithms in a modern quantum chemistry program package. *Phys Chem Chem Phys* **2006**, *8* (27), 3172-91.
12. Smith, S. G.; Goodman, J. M., Assigning stereochemistry to single diastereoisomers by GIAO NMR calculation: the DP4 probability. *J Am Chem Soc* **2010**, *132* (37), 12946-59.
13. Otsuka, Y.; Muto, A.; Takeuchi, R.; Okada, C.; Ishikawa, M.; Nakamura, K.; Yamamoto, N.; Dose, H.; Nakahigashi, K.; Tanishima, S.; Suharnan, S.; Nomura, W.; Nakayashiki, T.; Aref, W. G.; Bochner, B. R.; Conway, T.; Gribskov, M.; Kihara, D.; Rudd, K. E.; Tohsato, Y.; Wanner, B. L.; Mori, H., GenoBase: comprehensive resource database of *Escherichia coli* K-12. *Nucleic Acids Res* **2015**, *43* (Database issue), D606-17.
14. Davison, J. R.; Lohith, K. M.; Wang, X.; Bobyk, K.; Mandadapu, S. R.; Lee, S. L.; Cencic, R.; Nelson, J.; Simpkins, S.; Frank, K. M.; Pelletier, J.; Myers, C. L.; Piotrowski, J.; Smith, H. E.; Bewley, C. A., A New Natural Product Analog of Blastidicin S Reveals Cellular Uptake Facilitated by the NorA Multidrug Transporter. *Antimicrobial agents and chemotherapy* **2017**, *61* (6).
15. Piotrowski, J. S.; Simpkins, S. W.; Li, S. C.; Deshpande, R.; McIlwain, S. J.; Ong, I. M.; Myers, C. L.; Boone, C.; Andersen, R. J., Chemical genomic profiling via barcode sequencing to predict compound mode of action. *Methods in molecular biology (Clifton, N.J.)* **2015**, *1263*, 299-318.
16. Simpkins, S. W.; Nelson, J.; Deshpande, R.; Li, S. C.; Piotrowski, J. S.; Wilson, E. H.; Gebre, A. A.; Okamoto, R.; Ohya, Y.; Osada, H.; Yoshida, M.; Boone, C.; Myers, C. L., Large-scale

- interpretation of chemical-genetic interaction profiles using a genetic interaction network. *bioRxiv* **2017**.
17. Saldanha, A. J., Java Treeview--extensible visualization of microarray data. *Bioinformatics (Oxford, England)* **2004**, *20* (17), 3246-8.
  18. Robinson, M. D.; McCarthy, D. J.; Smyth, G. K., edgeR: a Bioconductor package for differential expression analysis of digital gene expression data. *Bioinformatics (Oxford, England)* **2010**, *26* (1), 139-40.
  19. Warde-Farley, D.; Donaldson, S. L.; Comes, O.; Zuberi, K.; Badrawi, R.; Chao, P.; Franz, M.; Grouios, C.; Kazi, F.; Lopes, C. T.; Maitland, A.; Mostafavi, S.; Montojo, J.; Shao, Q.; Wright, G.; Bader, G. D.; Morris, Q., The GeneMANIA prediction server: biological network integration for gene prioritization and predicting gene function. *Nucleic Acids Res* **2010**, *38* (Web Server issue), W214-20.
  20. Bellou, S.; Muentner, M.; Travers, M.; Leifer, B.; Baig, S.; Kramer, C.; Qi, M.; Joshi, C.; Carlson, A.; Conway, C., Determination of Escherichia coli Genes Involved in Resistance to DNA Alkylating Agents. *The FASEB Journal* **2016**, *30* (1 Supplement), 789.3-789.3.
  21. Okamura-Ikeda, K.; Ohmura, Y.; Fujiwara, K.; Motokawa, Y., Cloning and nucleotide sequence of the gcv operon encoding the Escherichia coli glycine-cleavage system. *Eur J Biochem* **1993**, *216* (2), 539-48.
  22. Christensen, Q. H.; Martin, N.; Mansilla, M. C.; de Mendoza, D.; Cronan, J. E., A novel amidotransferase required for lipoic acid cofactor assembly in Bacillus subtilis. *Mol Microbiol* **2011**, *80* (2), 350-63.
  23. Spencer, M. E.; Guest, J. R., Transcription analysis of the sucAB, aceEF and lpd genes of Escherichia coli. *Molecular & General Genetics : MGG* **1985**, *200* (1), 145-54.
  24. Zhang, Y.; Gao, R.; Ye, H.; Wang, Q.; Feng, Y., A new glimpse of FadR-DNA crosstalk revealed by deep dissection of the E. coli FadR regulatory protein. *Protein & cell* **2014**, *5* (12), 928-39.
  25. My, L.; Ghandour Achkar, N.; Viala, J. P.; Bouveret, E., Reassessment of the Genetic Regulation of Fatty Acid Synthesis in Escherichia coli: Global Positive Control by the Dual Functional Regulator FadR. *J Bacteriol* **2015**, *197* (11), 1862-72.
  26. Bacik, J. P.; Yeager, C. M.; Twary, S. N.; Marti-Arbona, R., Modulation of FadR binding capacity for acyl-CoA fatty acids through structure-guided mutagenesis. *The Protein Journal* **2015**, *34* (5), 359-66.

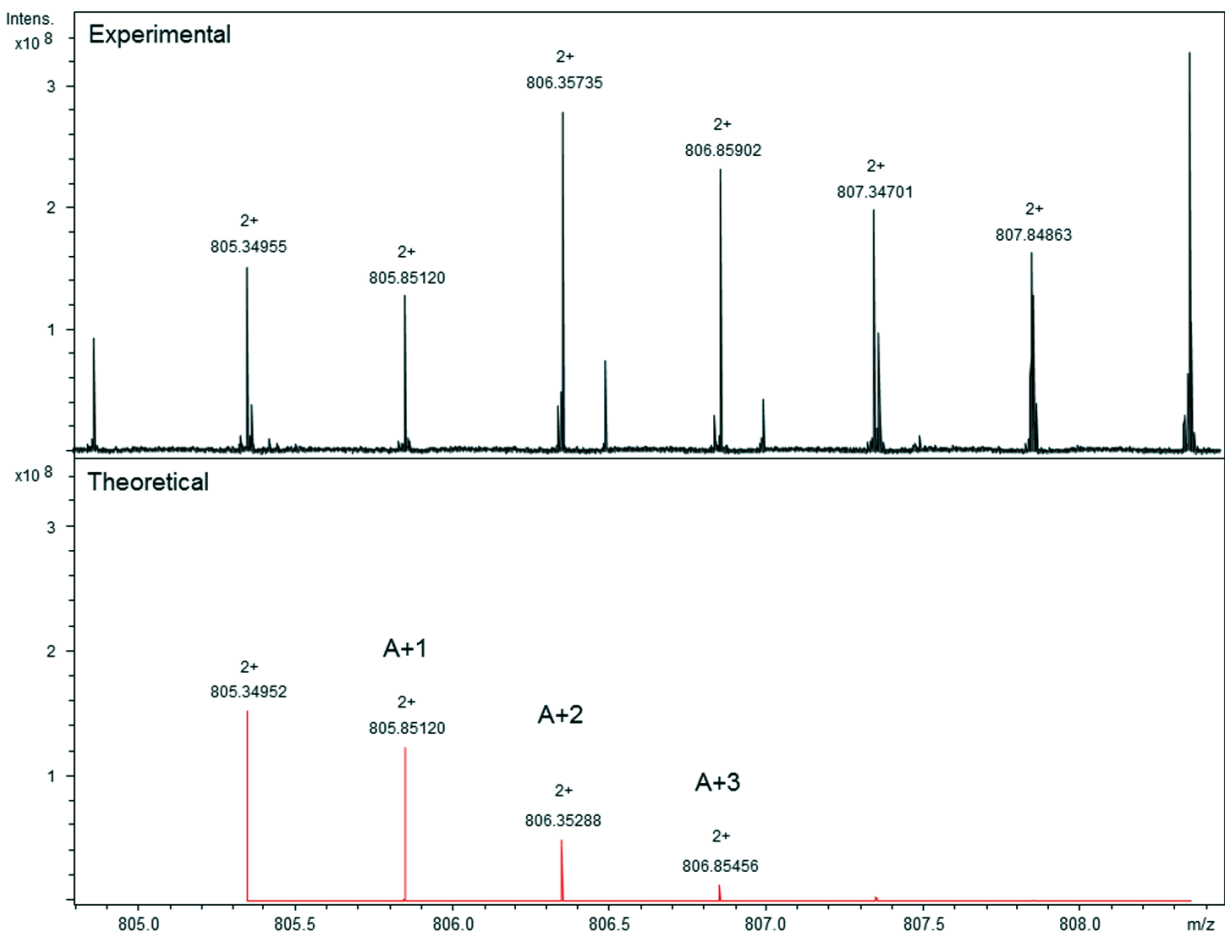

**Figure S1.** Ultra-high resolution FT-ICR mass spectrum for the  $[M+2H]^{2+}$  ion of  $C_{75}H_{108}N_4O_{34}$  at a resolving power of 2,000,000. The top spectrum is the experimental data, shown in black, and the bottom spectrum is the theoretical spectrum, shown in red, of  $[M+2H]^{2+} = C_{75}H_{108}N_4O_{34}$ . Isotopic clusters are labelled as A+1, A+2 and A+3.

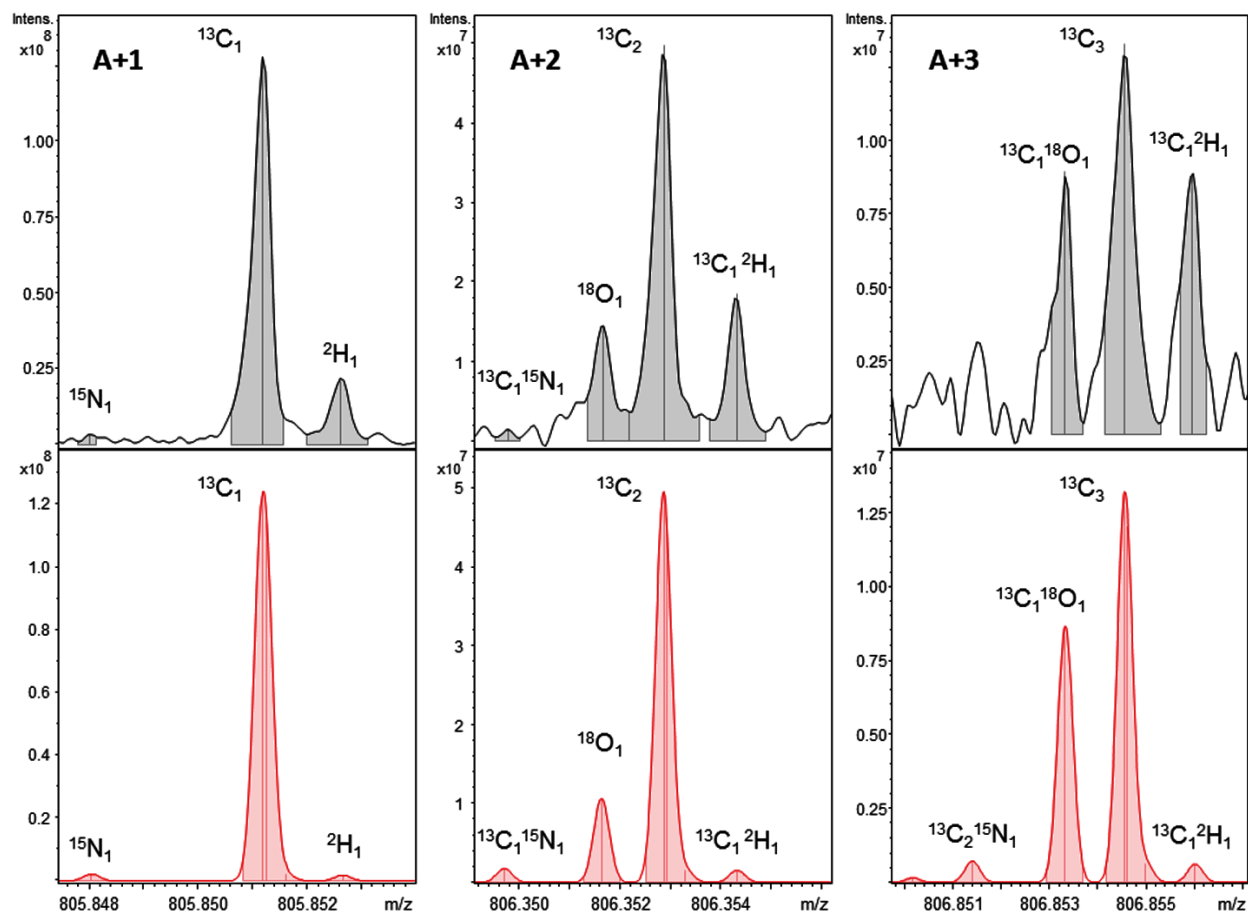

**Figure S2:** Isotopic fine structure observed in the A+1, A+2 and A+3 peaks confirm the molecular formula of Keyicin. For each isotopologue of  $C_{75}H_{108}N_4O_{34}$ , the peaks are labelled with the contributing isotope. The observed discrepancy in the  $^2H$  peaks is due to deuteration of the sample for NMR measurements. The top spectrum is the experimental data (black) and the bottom spectrum the theoretical spectrum (red) of  $[M+2H]^{2+} = C_{75}H_{108}N_4O_{34}$  at a resolving power of 2,000,000.

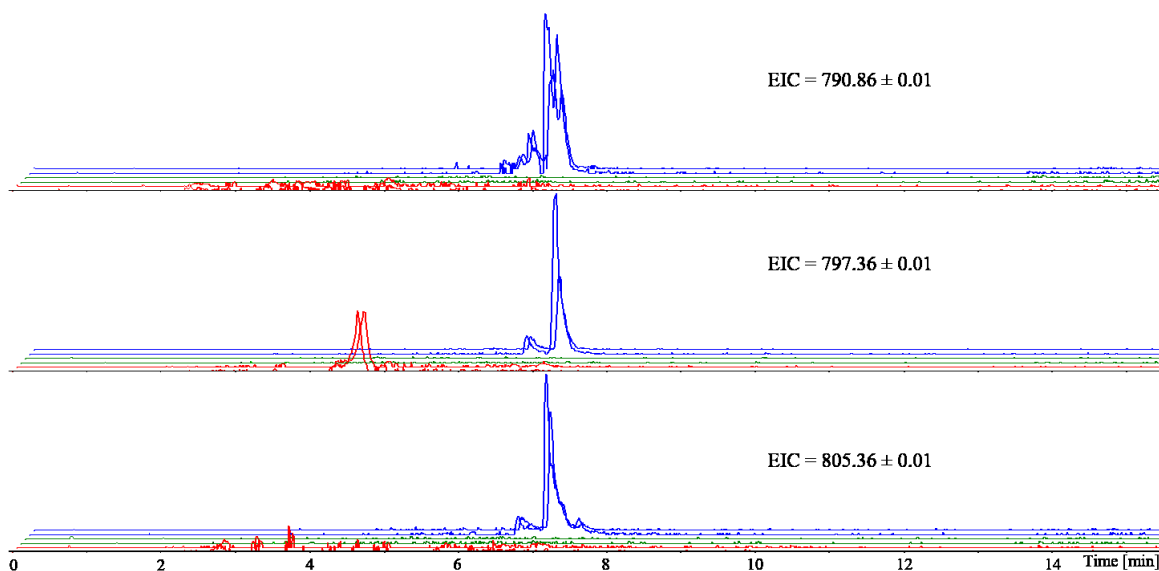

**Figure S3.** Extracted ion chromatograms of crude LCMS spectra for WMMB-235 (*Micromonospora* sp.) monoculture (red), WMMA-185 (*Rhodococcus* sp.) monoculture (green), and WMMB-235/ WMMA-185 co-culture (blue).

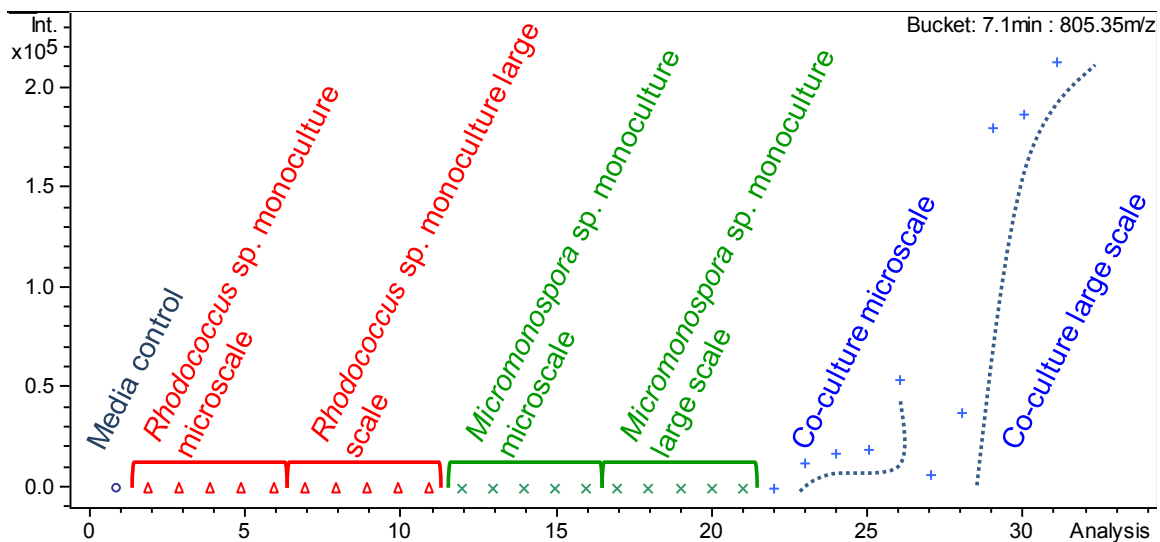

**Figure S4.** Dynamics of keyicin (**1**) production between microscale (500  $\mu$ L) and standard scale (100 mL) culture. Within each labeled group, symbols from left to right correspond to aliquots removed after 5, 7, 9, 11 and 13 days. The intensity of keyicin in each sample is plotted along the y-axis



**Table S1.** Keyicin <sup>1</sup>H and <sup>13</sup>C NMR data (600 MHz for <sup>1</sup>H, 125 MHz for <sup>13</sup>C, CD<sub>3</sub>OD)

| Position         | $\delta_C$ , <sup>b</sup> mult. | $\delta_H$ <sup>a</sup> (J in Hz)        | COSY | HMBC <sup>a</sup> | ROESY            |
|------------------|---------------------------------|------------------------------------------|------|-------------------|------------------|
| 1                | 149.2, C                        |                                          |      |                   |                  |
| 2                | 141.2, C                        |                                          |      |                   |                  |
| 3                | 123.9, CH                       | 7.38, s                                  |      | 1, 4a, 4, 5'      |                  |
| 4                | 157.7, C                        |                                          |      |                   |                  |
| 4a               | 115.9, C                        |                                          |      |                   |                  |
| 5                | 192.6, C                        |                                          |      |                   |                  |
| 5a               | 115.5, C                        |                                          |      |                   |                  |
| 6                | 163.1, C                        |                                          |      |                   |                  |
| 6a               | 132.2, C                        |                                          |      |                   |                  |
| 7                | 72.8, CH                        | 5.04, br s                               | 8    |                   |                  |
| 8                | 40.0, CH <sub>2</sub>           | 2.64, dd (overlap)<br>2.03, dd (overlap) | 7    |                   |                  |
| 9                | 70.3, C                         |                                          |      |                   |                  |
| 10               | 59.4, CH                        | 3.90, s                                  |      |                   |                  |
| 10a              | 144.8, C                        |                                          |      |                   |                  |
| 11               | 120.8, C                        |                                          |      |                   |                  |
| 11a              | 135.1, C                        |                                          |      |                   |                  |
| 12               | 181.0, C                        |                                          |      |                   |                  |
| 12a              | 118.1, C                        |                                          |      |                   |                  |
| 13               | 30.2, CH <sub>3</sub>           | 1.59, s                                  |      |                   |                  |
| COO              | 172.9, C                        |                                          |      |                   |                  |
| OCH <sub>3</sub> | 53.0, CH <sub>3</sub>           | 3.64, s                                  |      | COOH              |                  |
| 1'               | 98.8, CH                        | 5.84, br s                               | 2'   |                   |                  |
| 2'               | 70.1, CH                        | 4.29, d (10.8)                           | 1'   |                   | NCH <sub>3</sub> |
| 3'               | 62.7, CH                        | 3.66, dd, (overlap)                      |      |                   |                  |
| 4'               | 82.5, CH                        | 4.17, br s                               |      |                   |                  |
| 5'               | 78.2, C                         |                                          |      |                   |                  |
| 6'               | 24.2, CH <sub>3</sub>           | 1.65, d (5.5)                            |      | 2, 4', 5'         |                  |
| NCH <sub>3</sub> | 44.6, CH <sub>3</sub>           | 2.56, s                                  |      |                   | S1-1             |

**Table S1 cont.** Summary of  $^1\text{H}$  and  $^{13}\text{C}$  NMR data for **1** (600 MHz for  $^1\text{H}$ , 125 MHz for  $^{13}\text{C}$ ,  $\text{CD}_3\text{OD}$ )

| Position         | $\delta_{\text{C}}$ , <sup>b</sup> mult. | $\delta_{\text{H}}^{\text{a}}$ ( $J$ in Hz) | COSY | HMBC                  | ROESY                  |
|------------------|------------------------------------------|---------------------------------------------|------|-----------------------|------------------------|
| S1               |                                          |                                             |      |                       | 3, 4, 6                |
| 1                | 101.1, CH                                | 5.32, dd (overlap)                          | 2    |                       |                        |
| 2                | 34.8, CH <sub>2</sub>                    | 2.01, m<br>1.91, m                          | 1    | 3                     |                        |
| 3                | 66.3, CH                                 | 4.09, m                                     |      |                       |                        |
| 4                | 82.8, CH                                 | 3.83, dd (overlap)                          |      | 2, 3                  |                        |
| 5                | 68.8, CH                                 | 4.52, m                                     |      |                       |                        |
| 6                | 17.3, CH <sub>3</sub>                    | 1.21, d (overlap)                           |      | 5                     | 1, 4                   |
| S2               |                                          |                                             |      |                       |                        |
| 1                | 101.1, CH                                | 5.64, d (9.7)                               | 2    | S1-4                  | 4, 5                   |
| 2                | 43.4, CH <sub>2</sub>                    | 2.05, m<br>1.79, m                          | 1    |                       |                        |
| 3                | 102.6, C                                 |                                             |      |                       |                        |
| 4                | 89.0, CH                                 | 3.81, dd (overlap)                          |      | 5, 3, CH <sub>3</sub> |                        |
| 5                | 73.7, CH                                 | 4.91, m                                     |      |                       | CH <sub>3</sub>        |
| 6                | 19.8, CH <sub>3</sub>                    | 0.72, d (9.4)                               |      | 4                     | 4                      |
| CH <sub>3</sub>  | 19.6, CH <sub>3</sub>                    | 1.50, d (6.1)                               |      | 4, 5                  | 4, 5                   |
| S3               |                                          |                                             |      |                       |                        |
| 1                | 102.9, CH                                | 4.92, dd (overlap)                          | 2    | S2-4, 3               | S2-4                   |
| 2                | 33.8, CH <sub>2</sub>                    | 1.91, m<br>1.71, m                          | 1, 3 | 3, 4                  |                        |
| 3                | 66.7, CH                                 | 3.59, m                                     | 2    | 4                     |                        |
| 4                | 72.2, CH                                 | 3.47, dd (overlap)                          |      | 3                     |                        |
| 5                | 68.7, CH                                 | 3.5, m                                      |      | 4                     |                        |
| 6                | 17.2, CH <sub>3</sub>                    | 1.15, d (overlap)                           |      | 4, 5                  |                        |
| S4               |                                          |                                             |      |                       |                        |
| 1                | 101.9, CH                                | 5.5, br s                                   | 2    |                       | 6, NCH <sub>3</sub>    |
| 2                | 30.1, CH <sub>2</sub>                    | 2.13, m<br>2.04, m                          | 1, 3 |                       |                        |
| 3                | 63.9, CH                                 | 2.71, m                                     | 4    |                       |                        |
| 4                | 75.5, CH                                 | 4.05, dd (overlap)                          | 2, 3 |                       | S5-1, NCH <sub>3</sub> |
| 5                | 69.9, CH                                 | 4.11, m                                     |      |                       |                        |
| 6                | 18.5, CH <sub>3</sub>                    | 1.34, d (overlap)                           |      | 4, 5                  | 4, S5-1                |
| NCH <sub>3</sub> | 44.6, CH <sub>3</sub>                    | 2.56, s                                     |      |                       |                        |

**Table S1 cont.** Summary of  $^1\text{H}$  and  $^{13}\text{C}$  NMR data for **1** (600 MHz for  $^1\text{H}$ , 125 MHz for  $^{13}\text{C}$ ,  $\text{CD}_3\text{OD}$ )

| Position      | $\delta_{\text{C}},^{\text{b}}$ mult. | $\delta_{\text{H}}^{\text{a}}$ ( $J$ in Hz) | COSY   | HMBC    | ROESY                  |
|---------------|---------------------------------------|---------------------------------------------|--------|---------|------------------------|
| S5            |                                       |                                             |        |         | S4-4, S4-6             |
| 1             | 101.1, CH                             | 5.15, d (11.6)                              | 2      |         |                        |
| 2             | 35.2, $\text{CH}_2$                   | 2.01, m<br>1.91, m                          | 1      | 3       |                        |
| 3             | 66.3, CH                              | 4.09, m                                     |        |         |                        |
| 4             | 82.9, CH                              | 3.93, d (8.6)                               |        | 2, 3    | 1                      |
| 5             | 68.6, CH                              | 4.40, m                                     |        |         |                        |
| 6             | 17.4, $\text{CH}_3$                   | 1.19, d (overlap)                           |        | 5       | S6-1                   |
| S6            |                                       |                                             |        |         |                        |
| 1             | 101.1, CH                             | 5.31, dd (overlap)                          | 2      | S5-4    | 6                      |
| 2             | 42.6, $\text{CH}_2$                   | 2.60, dd (overlap)<br>2.03, dd (overlap)    | 1      | 3, 4    |                        |
| 3             | 90.3, C                               |                                             |        |         |                        |
| 4             | 84.9, CH                              | 3.49, dd (overlap)                          | 5      |         | 6, S7-1, $\text{CH}_3$ |
| 5             | 71.8, CH                              | 4.07, m                                     | 4, 6   | 4       |                        |
| 6             | 19.0, $\text{CH}_3$                   | 1.33, d (overlap)                           | 5      |         | S7-1, $\text{CH}_3$    |
| $\text{CH}_3$ | 25.5, $\text{CH}_3$                   | 1.75, s                                     |        | 2, 3, 4 | 4, 6                   |
| S7            |                                       |                                             |        |         |                        |
| 1             | 103.1, CH                             | 5.01, dd (?)                                | 2      | S6-4, 3 | S6-4                   |
| 2             | 33.8, $\text{CH}_2$                   | 1.95, m<br>1.74, m                          | 1<br>3 |         |                        |
| 3             | 66.7, CH                              | 3.75, dd                                    | 2      |         | 5                      |
| 4             | 72.3, CH                              | 3.54, dd                                    |        | 2, 3, 4 | 6                      |
| 5             | 69.1, CH                              | 3.96, m                                     | 6      |         | 3                      |
| 6             | 17.1, $\text{CH}_3$                   | 1.23, d (overlap)                           | 5      | 4, 5    | 4                      |

<sup>a</sup>HMBC correlations are from proton(s) to the indicated carbon.

**Table S2.** U-<sup>13</sup>C glucose media study for keyicin production.

| Medium | Yeast Extract (g/L) | Malt Extract (g/L) | U- <sup>13</sup> C glucose (g/L) | Peptone (g/L) | CaCO <sub>3</sub> (g/L) | Starch (g/L) |
|--------|---------------------|--------------------|----------------------------------|---------------|-------------------------|--------------|
| 1      | 2                   | 5                  | 2                                | 0             | 0                       | 0            |
| 2      | 2                   | 2.5                | 4                                | 0             | 0                       | 0            |
| 3      | 2                   | 0                  | 4                                | 2.5           | 0                       | 0            |
| 4      | 2                   | 0                  | 2                                | 5             | 0                       | 0            |
| 5      | 2                   | 2.5                | 2                                | 2.5           | 0                       | 0            |
| 6      | 5                   | 0                  | 10                               | 5             | 5                       | 5            |
| 7      | 5                   | 0                  | 20                               | 5             | 5                       | 0            |

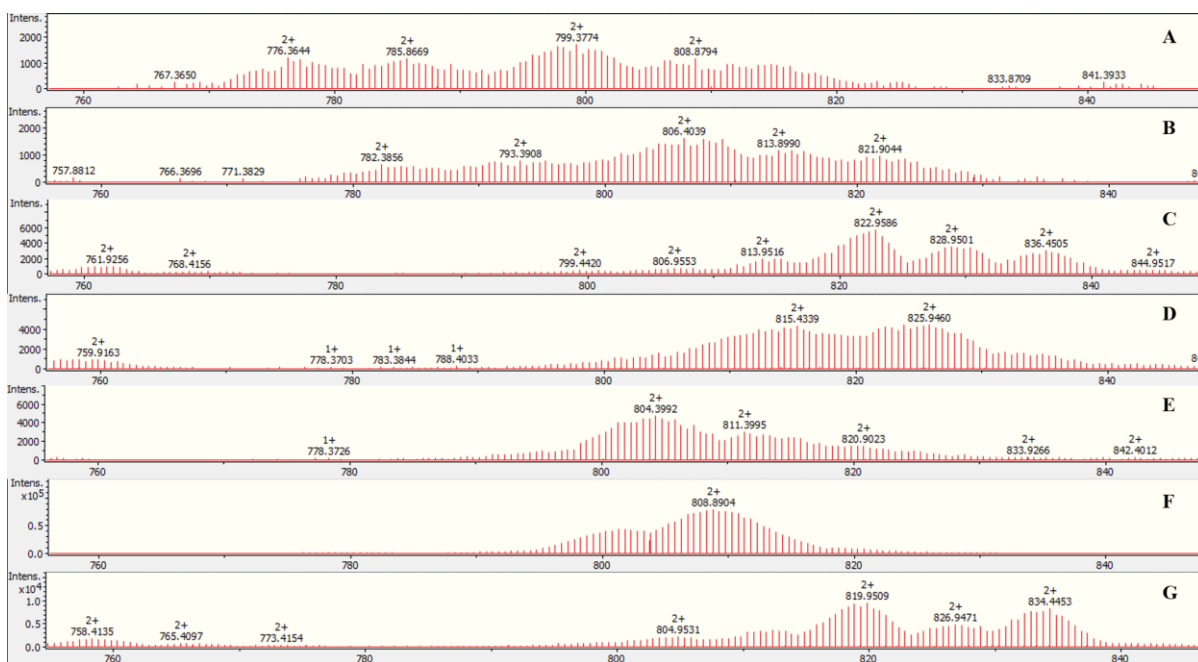**Figure S5.** WMMB235 and WMMA185 co-culture was grown under seven different media conditions containing U-<sup>13</sup>C glucose. Extracts were subjected to LC/MS analysis to evaluate the incorporation of <sup>13</sup>C into keyicin. (A) media 1 (ASW-D) (**Table S2**); (B) media 2 (**Table S2**); (C) media 3 (**Table S2**); (D) media 4 (**Table S2**); (E) media 5 (**Table S2**); (F) media 6 (**Table S2**); (G) media 7 (**Table S2**).

**Figure S6.**  $^1\text{H}$  NMR (600 MHz,  $\text{CD}_3\text{OD}$ ) of keyicin

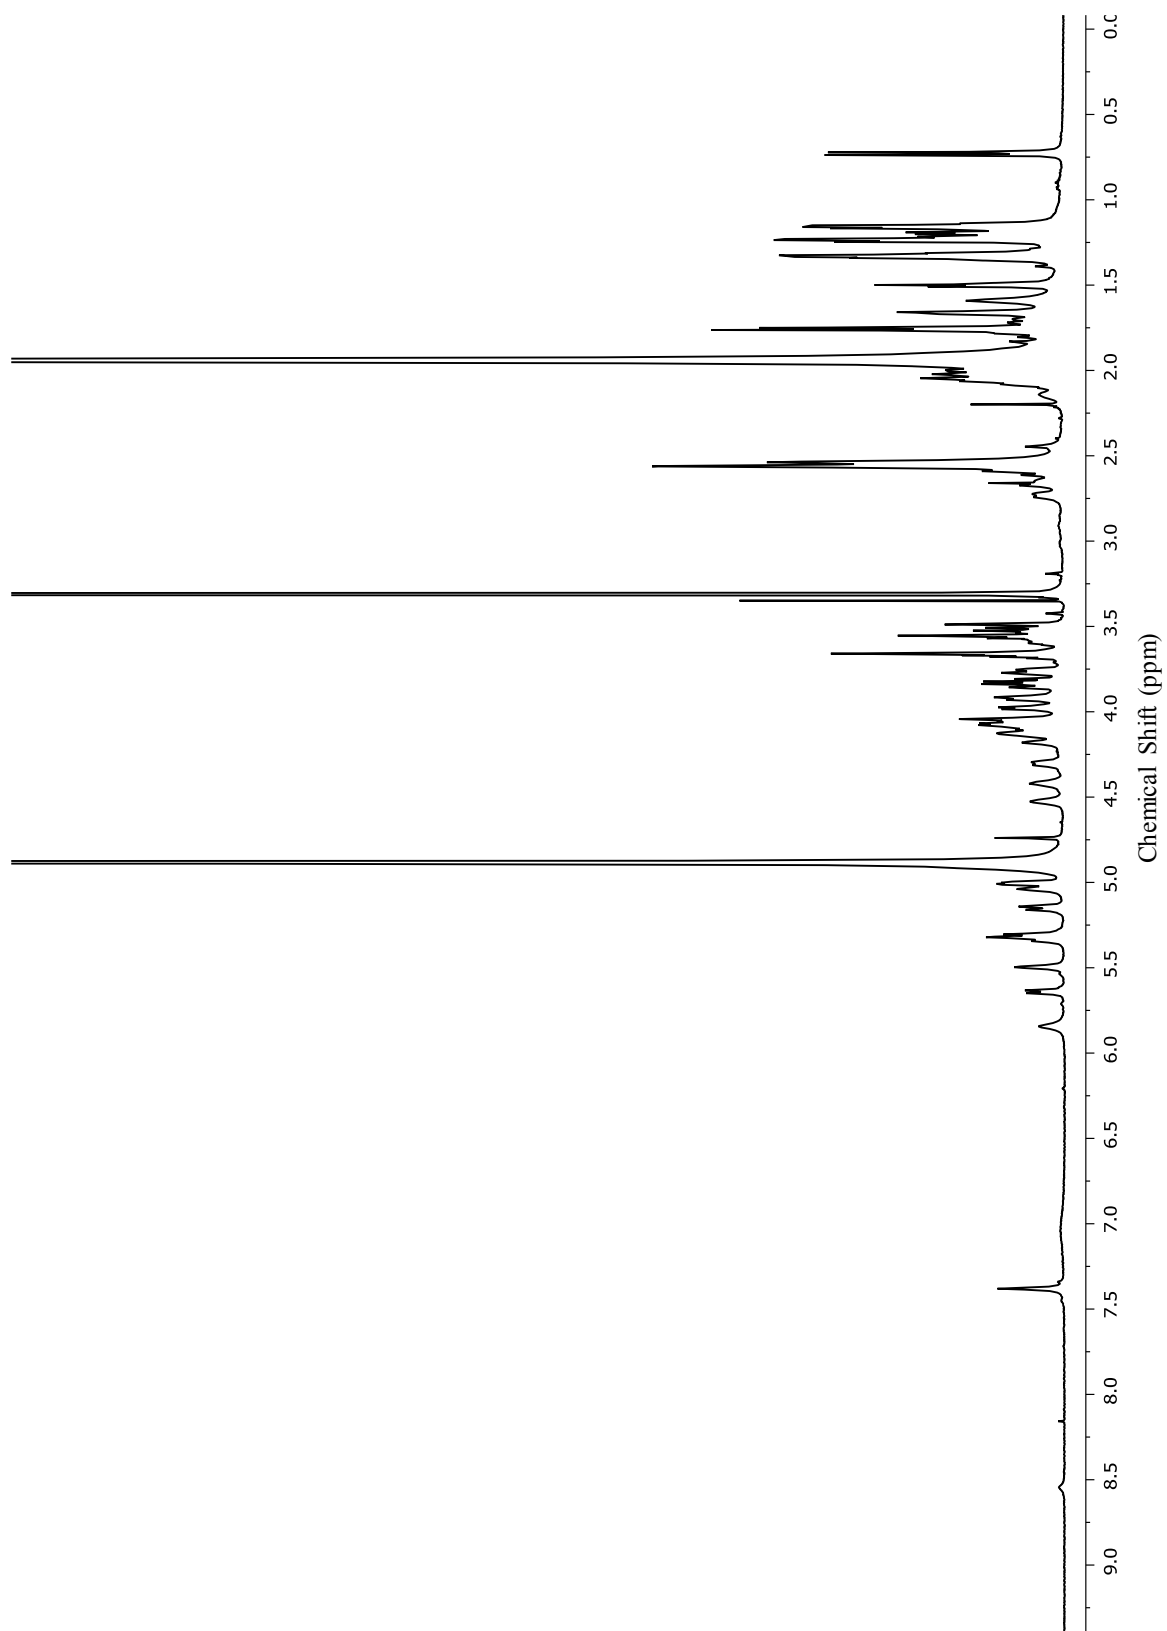

**Figure S7.**  $^{13}\text{C}$  NMR (125 MHz,  $\text{CD}_3\text{OD}$ ) of keyicin

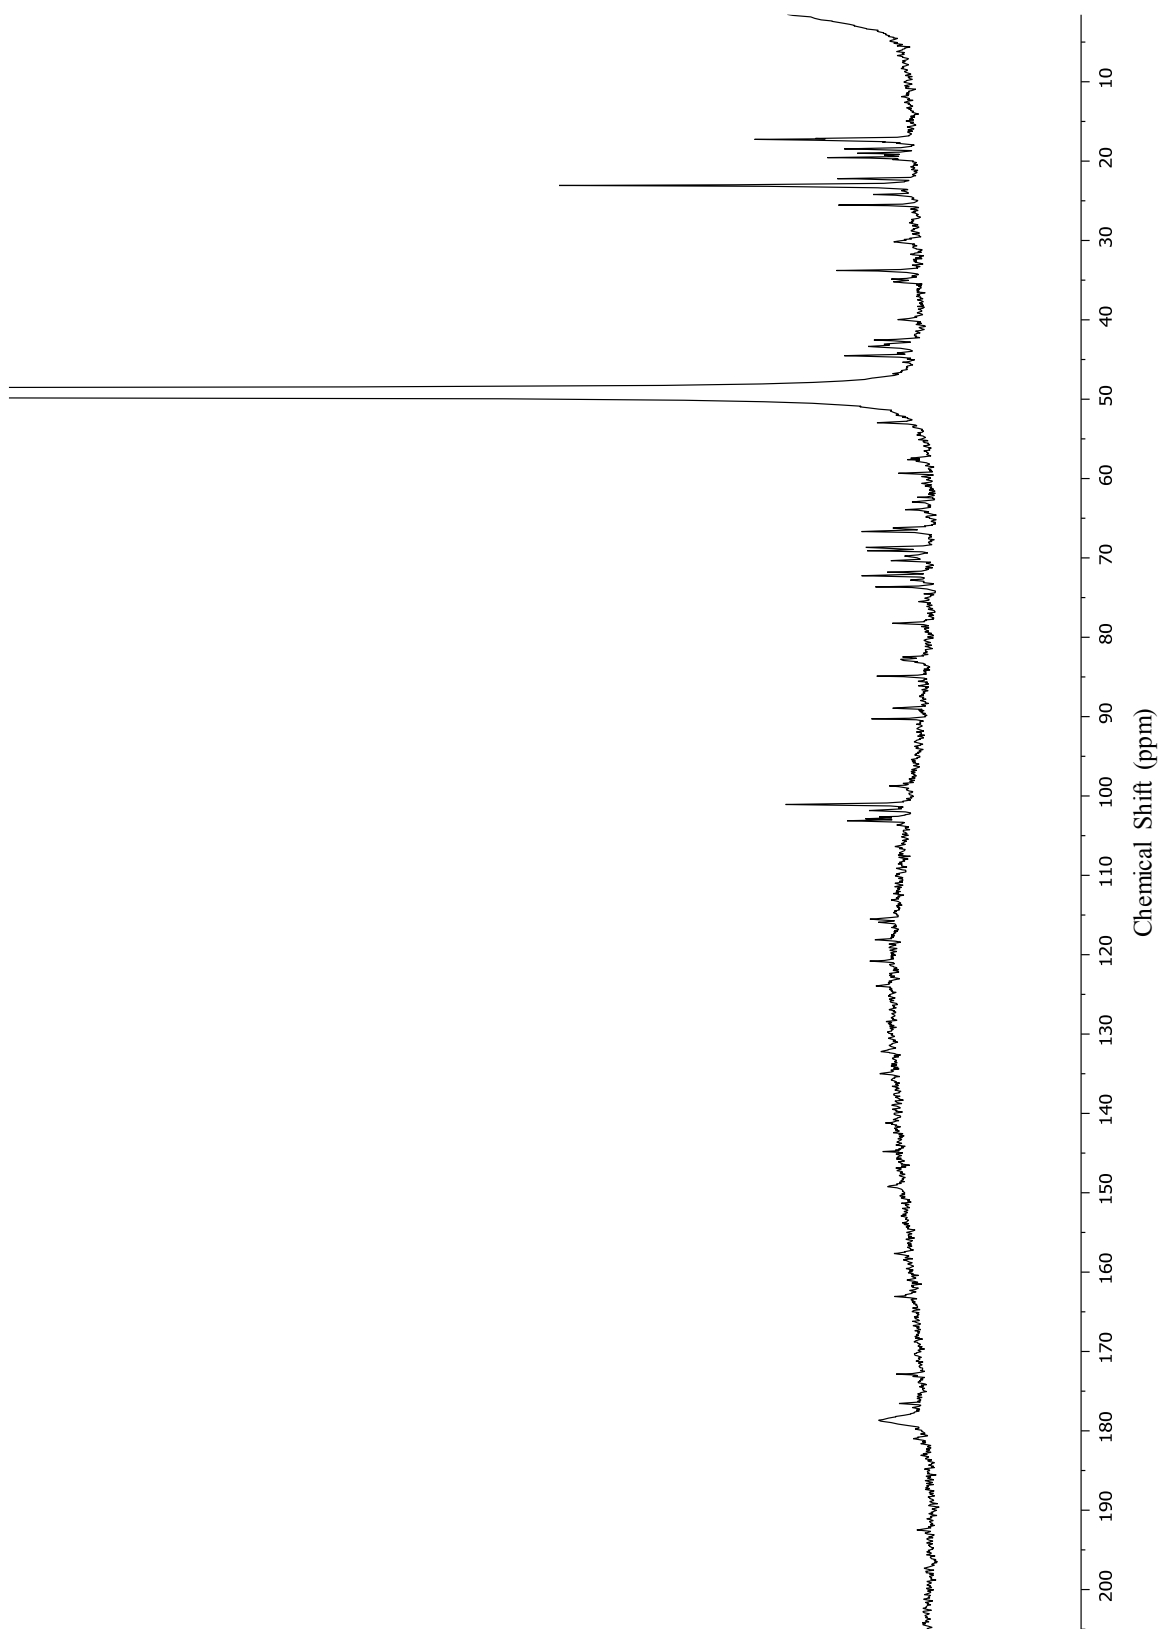

**Figure S8.** 2D COSY NMR (600 MHz, CD<sub>3</sub>OD) of keyicin

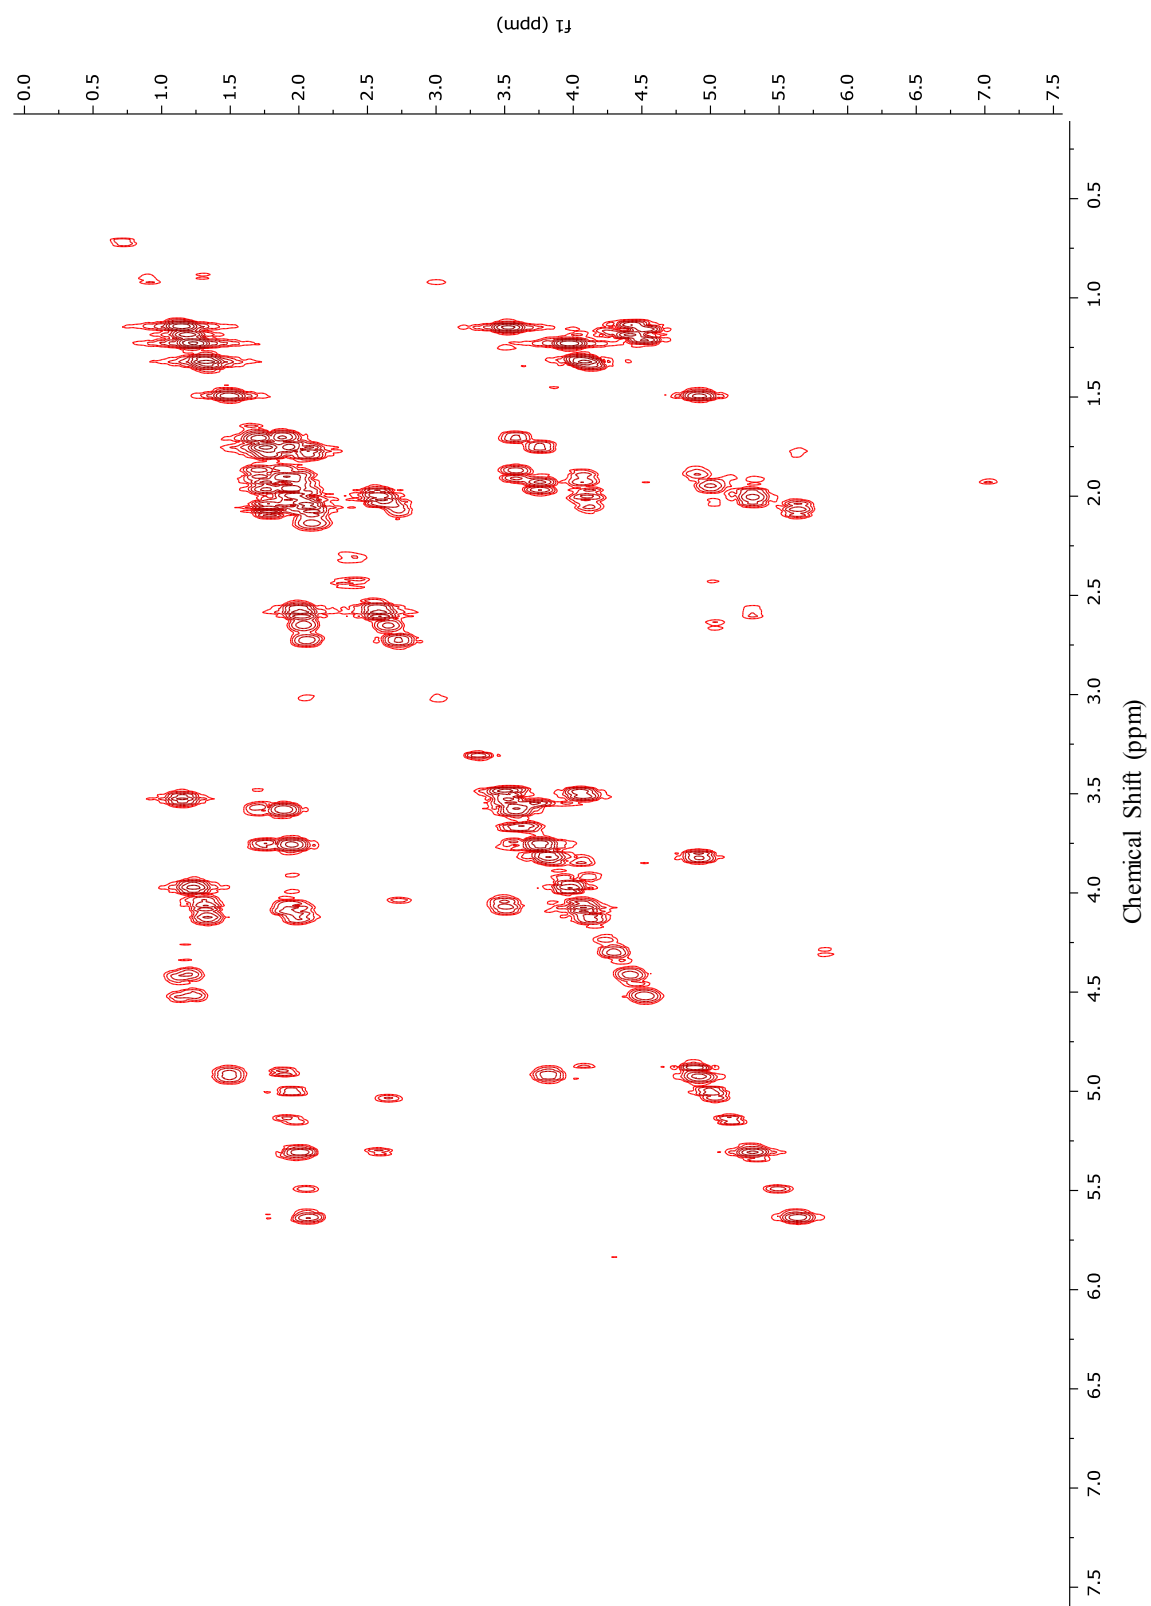

Figure S9. 2D HSQC NMR (600 MHz, CD<sub>3</sub>OD) of keyicin

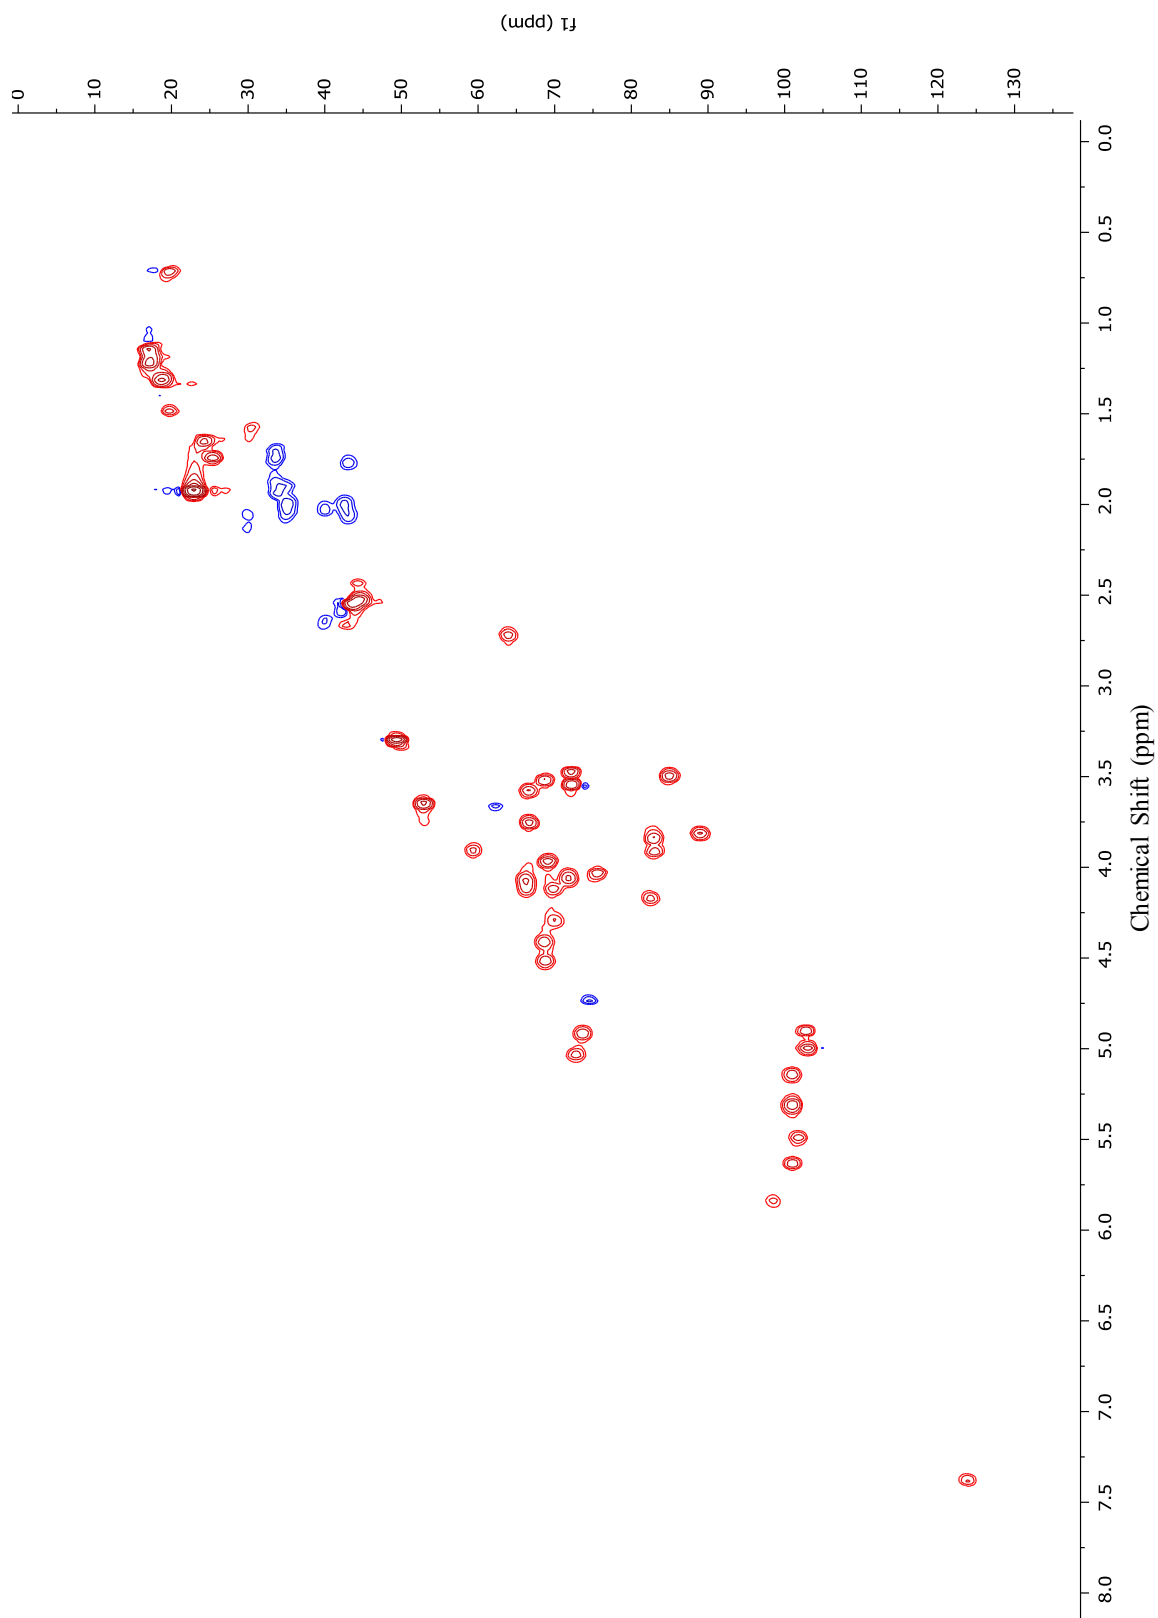



**Figure S10.** 2D HMBC NMR (600 MHz, CD<sub>3</sub>OD) of keyicin

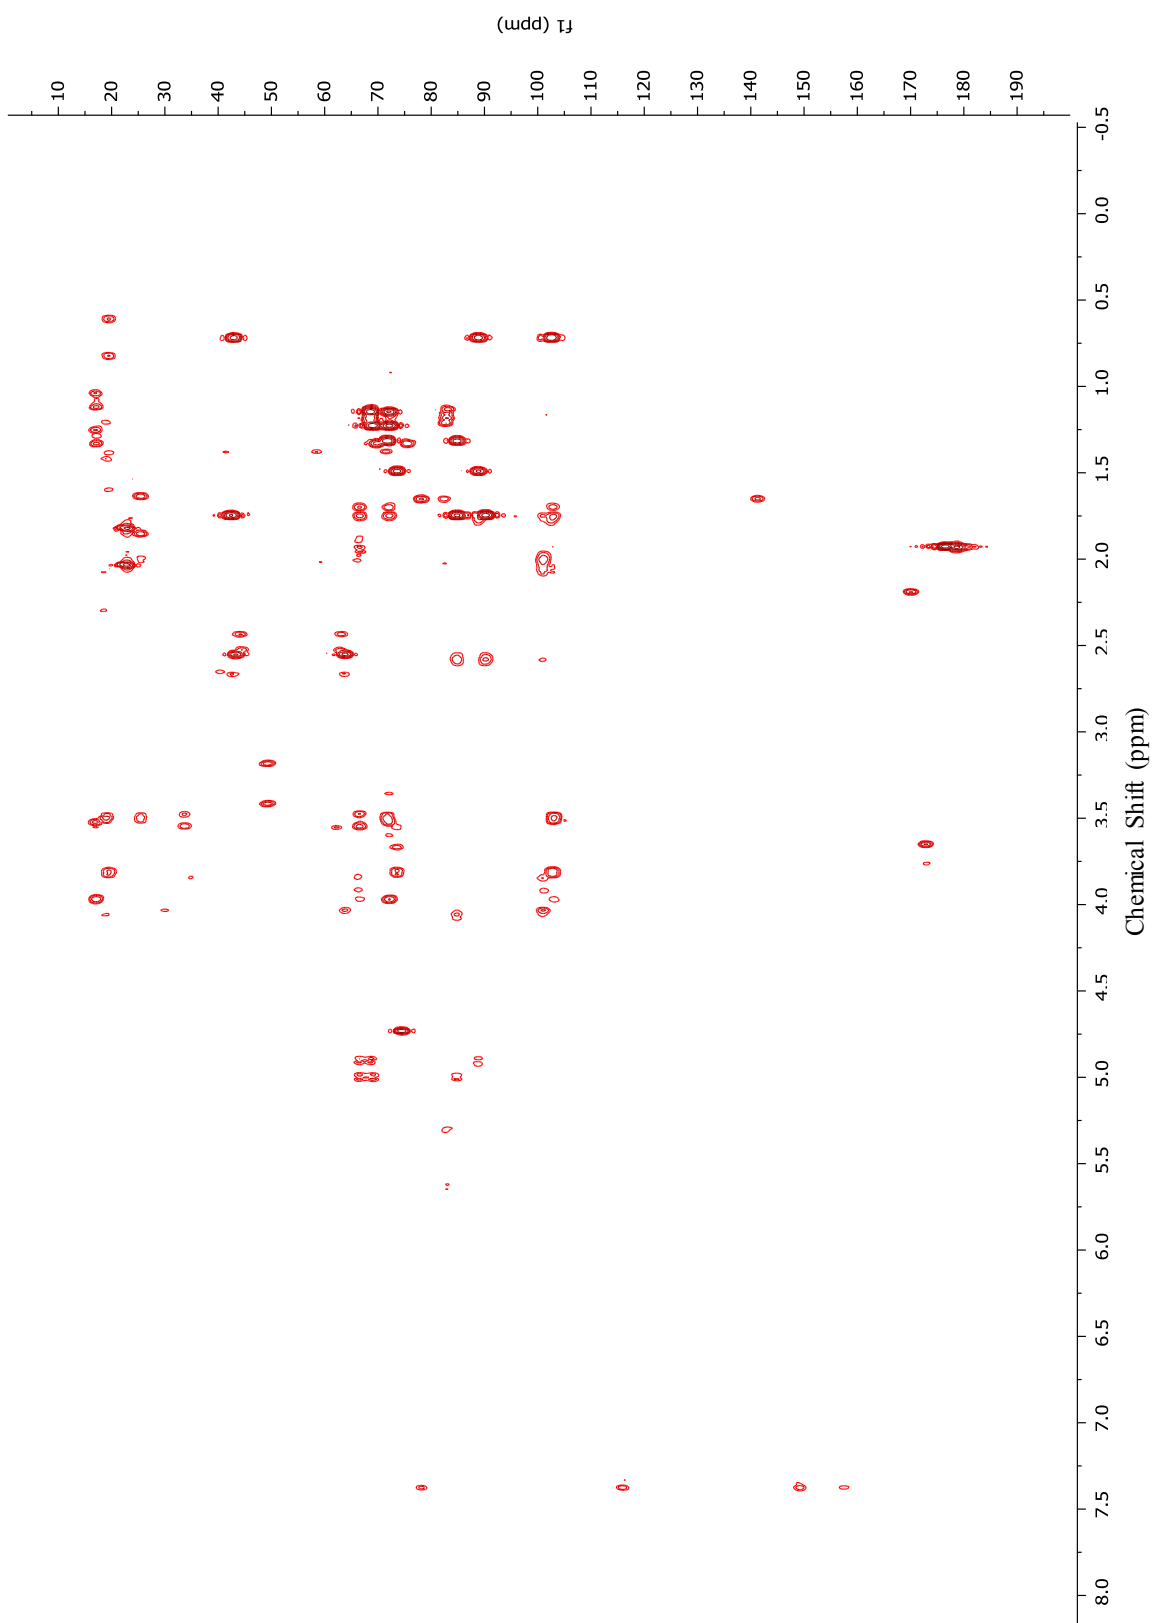

**Figure S11.** 2D ROESY NMR (600 MHz, CD<sub>3</sub>OD) of keyicin

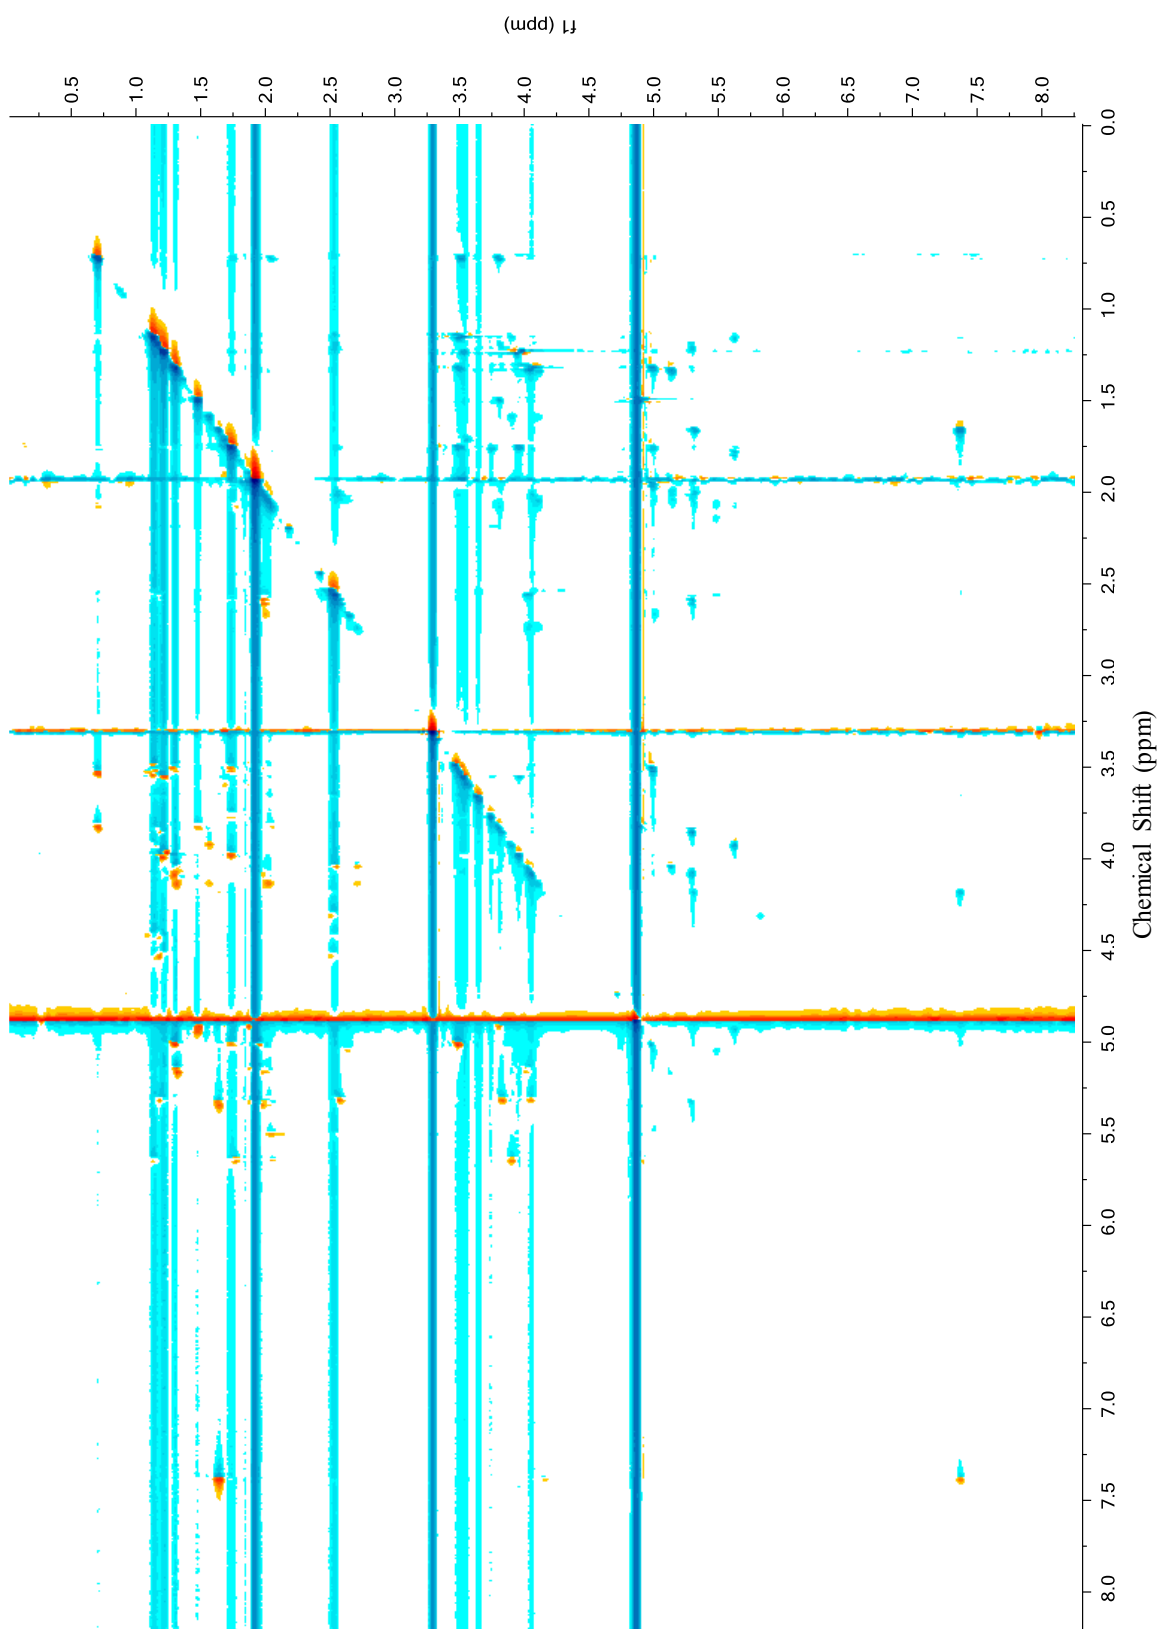

**Figure S12.**  $^{13}\text{C}$ - $^{13}\text{C}$  COSY NMR (125 MHz,  $\text{CD}_3\text{OD}$ ) of  $^{13}\text{C}$ -labeled keyicin

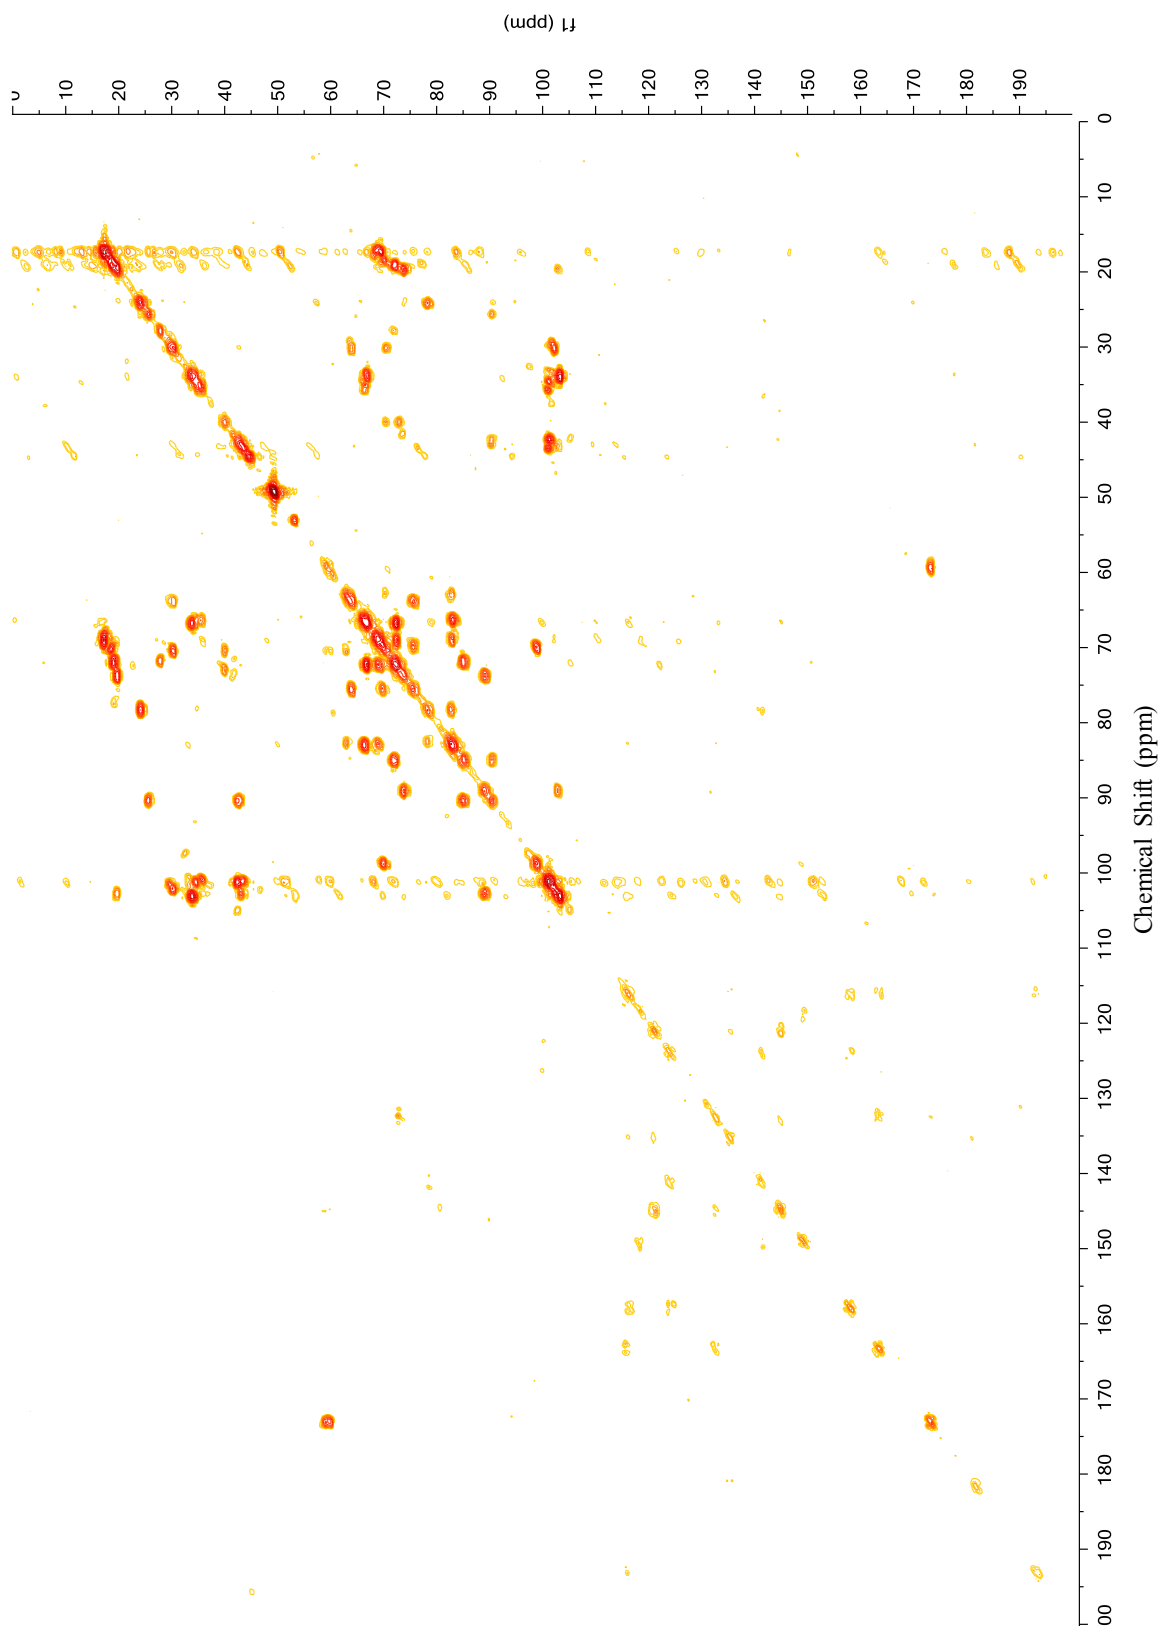

**Figure S13.** Characterization of sugar S1 using molecular modeling and DFT calculations

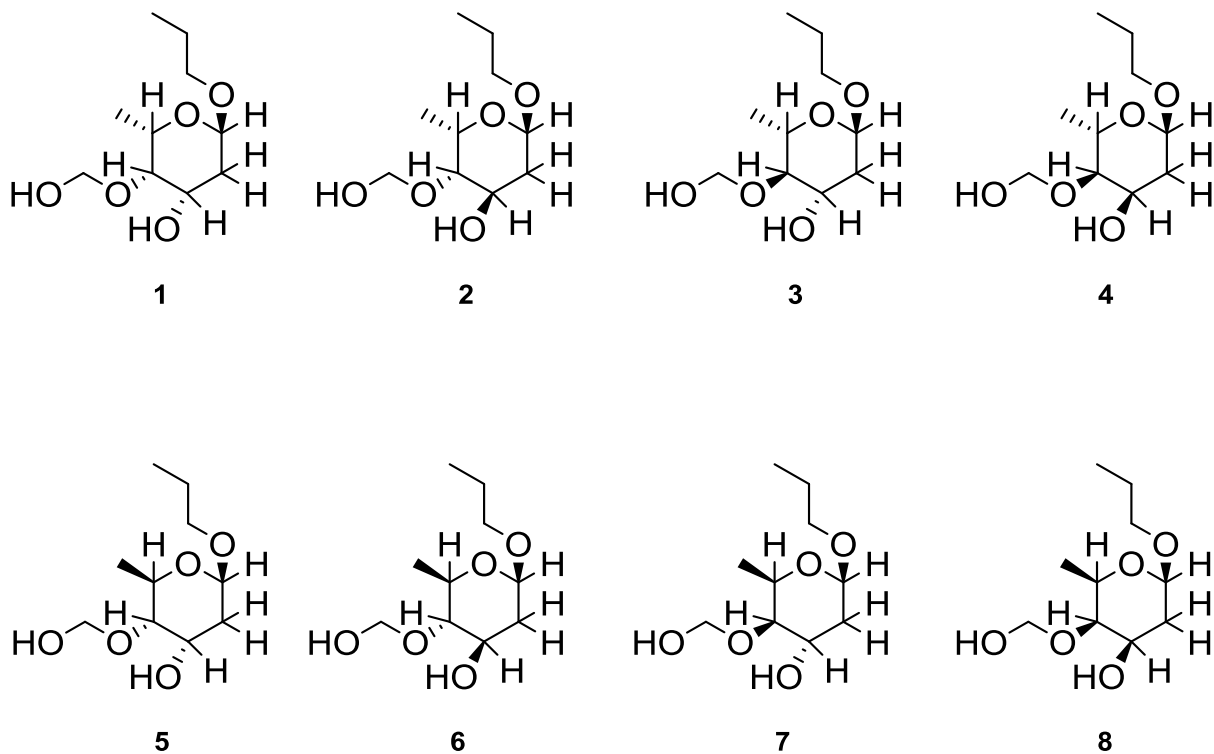

|                 | 1    | $\Delta$ | 2    | $\Delta$ | 3    | $\Delta$ | 4    | $\Delta$ | 5    | $\Delta$ | 6     | $\Delta$ | 7    | $\Delta$ | 8     | $\Delta$ | Experimental |
|-----------------|------|----------|------|----------|------|----------|------|----------|------|----------|-------|----------|------|----------|-------|----------|--------------|
| 1               | 98.9 | 2.2      | 99.6 | 1.5      | 98.1 | 3.0      | 98.8 | 2.3      | 98.4 | 2.7      | 100.9 | 0.2      | 99.9 | 1.2      | 100.8 | 0.3      | 101.1        |
| 2               | 36.6 | 1.8      | 31.7 | 3.1      | 38.1 | 3.3      | 36.8 | 2.0      | 38.5 | 3.7      | 39.1  | 4.3      | 38.8 | 4.0      | 37.9  | 3.1      | 34.8         |
| 3               | 65.3 | 1.0      | 67.8 | 1.5      | 66.8 | 0.5      | 68.5 | 2.2      | 66.4 | 0.1      | 70.0  | 3.7      | 62.8 | 3.5      | 69.1  | 2.8      | 66.3         |
| 4               | 86.0 | 3.2      | 78.7 | 4.1      | 91.5 | 8.7      | 78.7 | 4.1      | 81.2 | 1.6      | 90.8  | 8.0      | 88.2 | 5.4      | 84.7  | 1.9      | 82.8         |
| 5               | 68.1 | 0.7      | 64.0 | 4.8      | 66.5 | 2.3      | 63.9 | 4.9      | 68.8 | 0.0      | 71.0  | 2.2      | 72.9 | 4.1      | 71.8  | 3.0      | 68.6         |
| 6               | 18.3 | 1.0      | 18.3 | 1.0      | 19.2 | 1.9      | 19.0 | 1.7      | 18.9 | 1.6      | 19.1  | 1.8      | 18.2 | 0.9      | 18.2  | 0.9      | 17.3         |
| Sum of $\Delta$ |      | 10.0     |      | 16.0     |      | 19.6     |      | 17.2     |      | 9.7      |       | 20.2     |      | 19.1     |       | 12.1     |              |
| DP4 (%)         | 6.7  |          | 9.1  |          | 0.0  |          | 16.0 |          | 46.2 |          | 0.6   |          | 0.0  |          | 21.3  |          |              |

**Figure S14.** Characterization of sugar S2 using molecular modeling and DFT calculations

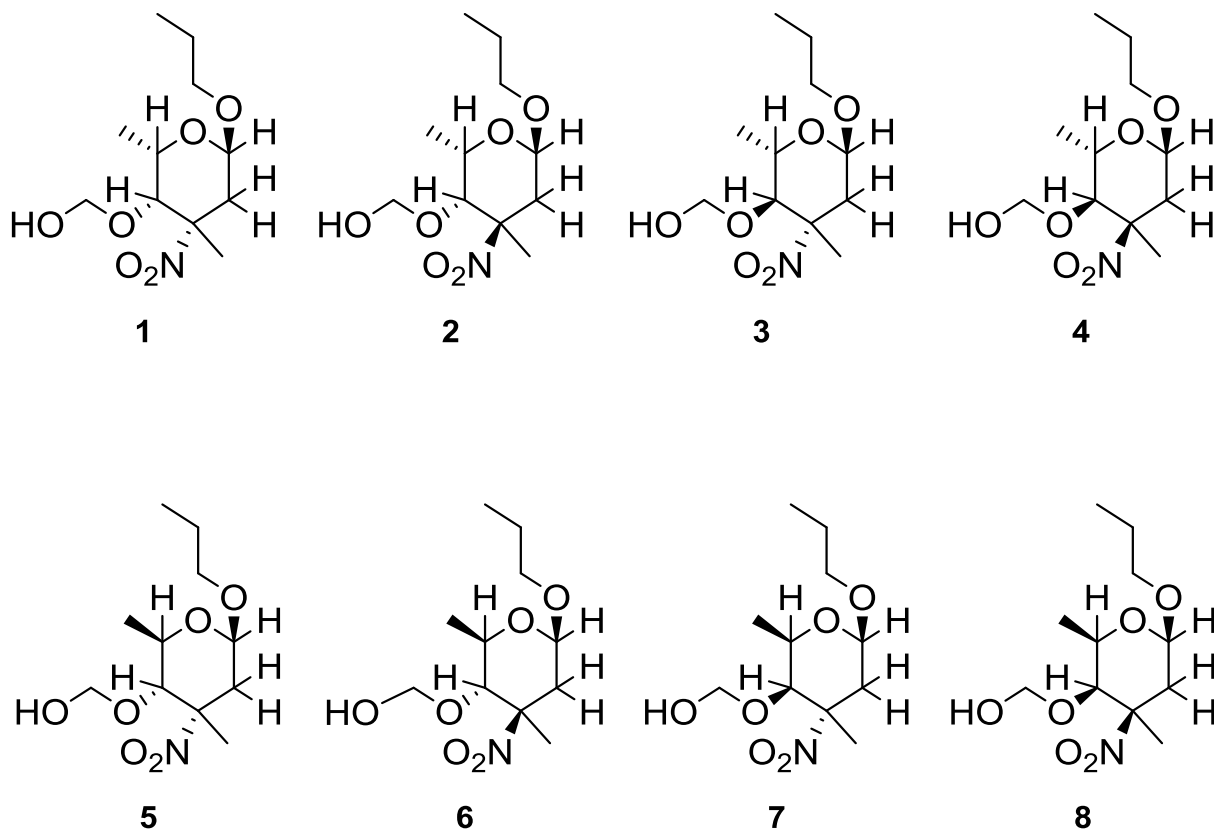

|                 | 1    | $\Delta$ | 2    | $\Delta$ | 3    | $\Delta$ | 4    | $\Delta$ | 5    | $\Delta$ | 6    | $\Delta$ | 7    | $\Delta$ | 8    | $\Delta$ | Experimental |
|-----------------|------|----------|------|----------|------|----------|------|----------|------|----------|------|----------|------|----------|------|----------|--------------|
| 1               | 98.2 | 2.9      | 96.5 | 4.6      | 97.3 | 3.8      | 96.0 | 5.1      | 99.6 | 1.5      | 98.5 | 2.6      | 98.7 | 2.4      | 99.5 | 1.6      | 101.1        |
| 2               | 34.5 | 8.9      | 37.0 | 6.4      | 38.9 | 4.5      | 43.8 | 0.4      | 43.3 | 0.1      | 41.4 | 2.0      | 36.5 | 6.9      | 36.9 | 6.5      | 43.4         |
| 3               | 92.2 | 10.4     | 88.3 | 14.3     | 94.3 | 8.3      | 87.6 | 15.0     | 91.8 | 10.8     | 94.5 | 8.1      | 92.9 | 9.7      | 92.9 | 9.7      | 102.6        |
| 4               | 76.6 | 12.4     | 77.7 | 11.3     | 80.9 | 8.1      | 80.9 | 8.1      | 86.0 | 3.0      | 81.6 | 7.4      | 75.7 | 13.3     | 73.3 | 15.7     | 89.0         |
| 5               | 66.9 | 6.8      | 65.6 | 8.1      | 67.2 | 6.5      | 66.6 | 7.1      | 71.1 | 2.6      | 71.7 | 2.0      | 70.7 | 3.0      | 71.3 | 2.4      | 73.7         |
| 6               | 19.0 | 0.8      | 17.7 | 2.1      | 18.5 | 1.3      | 19.0 | 0.8      | 19.1 | 0.7      | 19.1 | 0.7      | 18.7 | 1.1      | 18.9 | 0.9      | 19.8         |
| 7               | 26.2 | 6.6      | 26.0 | 6.4      | 19.4 | 0.2      | 27.5 | 7.9      | 27.0 | 7.4      | 20.0 | 0.4      | 27.0 | 7.4      | 24.4 | 4.8      | 19.6         |
| Sum of $\Delta$ |      | 42.2     |      | 46.9     |      | 32.4     |      | 36.5     |      | 18.6     |      | 22.9     |      | 36.3     |      | 36.8     |              |
| DP4 (%)         | 0.0  |          | 0.0  |          | 47.9 |          | 0.0  |          | 0.1  |          | 52.0 |          | 0.0  |          | 0.0  |          |              |

**Figure S15.** Characterization of sugar S3 using molecular modeling and DFT calculations

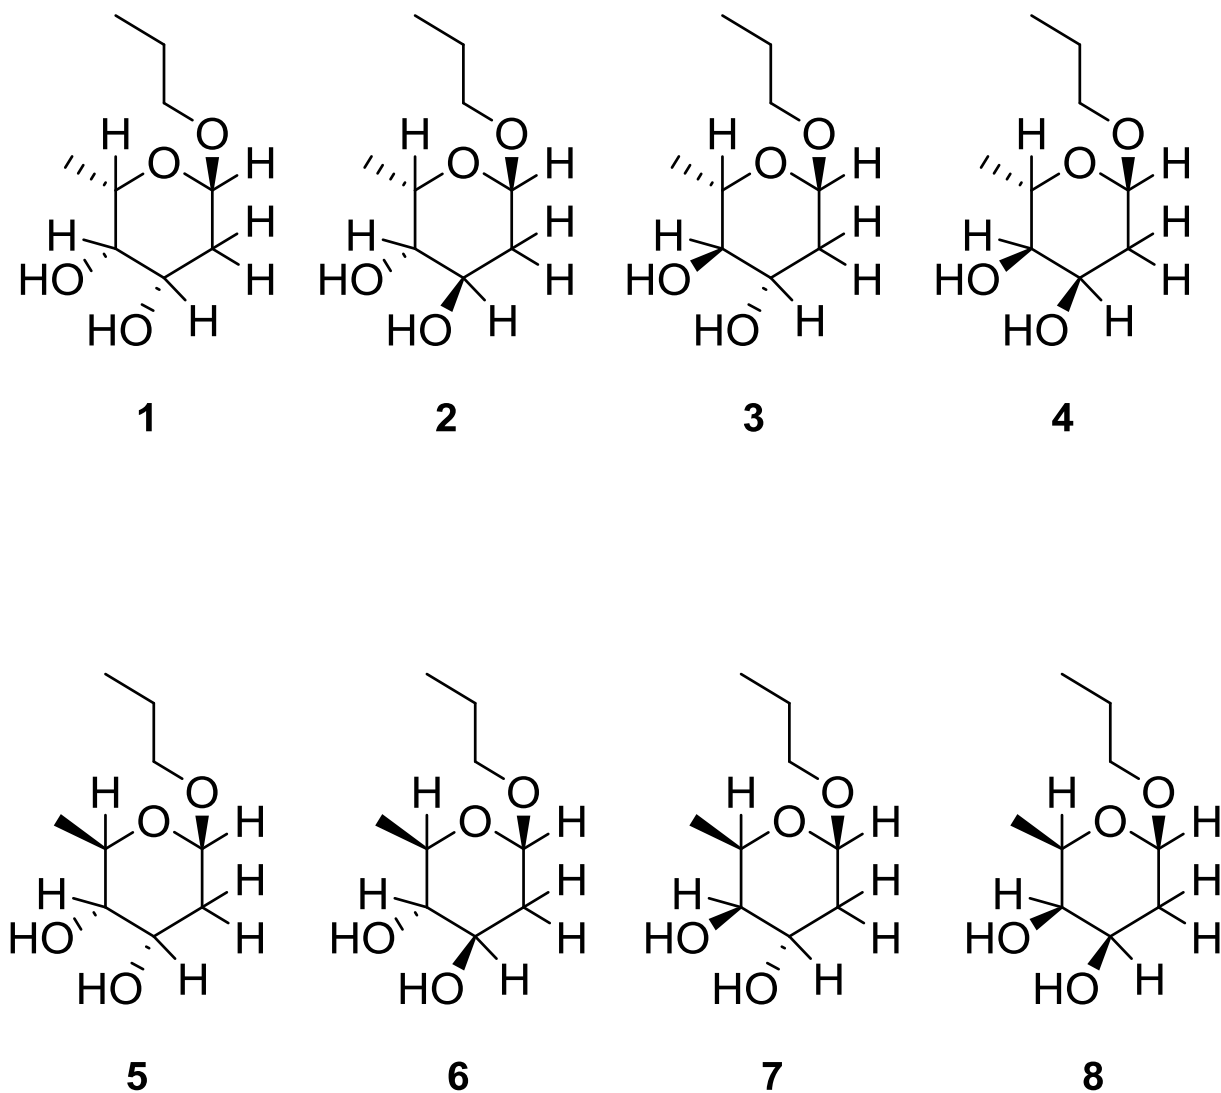

|   | 1    | $\Delta$ | 2    | $\Delta$ | 3    | $\Delta$ | 4    | $\Delta$ | 5    | $\Delta$ | 6     | $\Delta$ | 7    | $\Delta$ | 8     | $\Delta$ | Experimental |
|---|------|----------|------|----------|------|----------|------|----------|------|----------|-------|----------|------|----------|-------|----------|--------------|
| 1 | 98.1 | 4.8      | 99.3 | 3.6      | 98.3 | 4.6      | 97.8 | 5.1      | 98.2 | 4.7      | 100.4 | 2.5      | 99.3 | 3.6      | 100.6 | 2.3      | 102.9        |
| 2 | 36.5 | 2.7      | 31.9 | 1.9      | 39.9 | 6.1      | 36.0 | 2.2      | 39.7 | 5.9      | 40.5  | 6.7      | 35.4 | 1.6      | 37.9  | 4.1      | 33.8         |
| 3 | 65.8 | 0.9      | 69.3 | 2.6      | 70.9 | 4.2      | 68.6 | 1.9      | 70.8 | 4.1      | 73.2  | 6.5      | 71.9 | 5.2      | 68.8  | 2.1      | 66.7         |
| 4 | 72.6 | 0.4      | 71.6 | 0.6      | 77.6 | 5.4      | 71.5 | 0.7      | 74.1 | 1.9      | 78.3  | 6.1      | 71.8 | 0.4      | 71.9  | 0.3      | 72.2         |
| 5 | 67.2 | 1.5      | 64.9 | 3.8      | 69.2 | 0.5      | 67.7 | 1.0      | 71.1 | 2.4      | 72.8  | 4.1      | 70.7 | 2.0      | 72.4  | 3.7      | 68.7         |
| 6 | 18.1 | 0.9      | 17.9 | 0.7      | 18.8 | 1.6      | 18.8 | 1.6      | 18.9 | 1.7      | 18.5  | 1.3      | 17.6 | 0.4      | 17.9  | 0.7      | 17.2         |

**Figure S16.** Characterization of sugar S4 using molecular modeling and DFT calculations

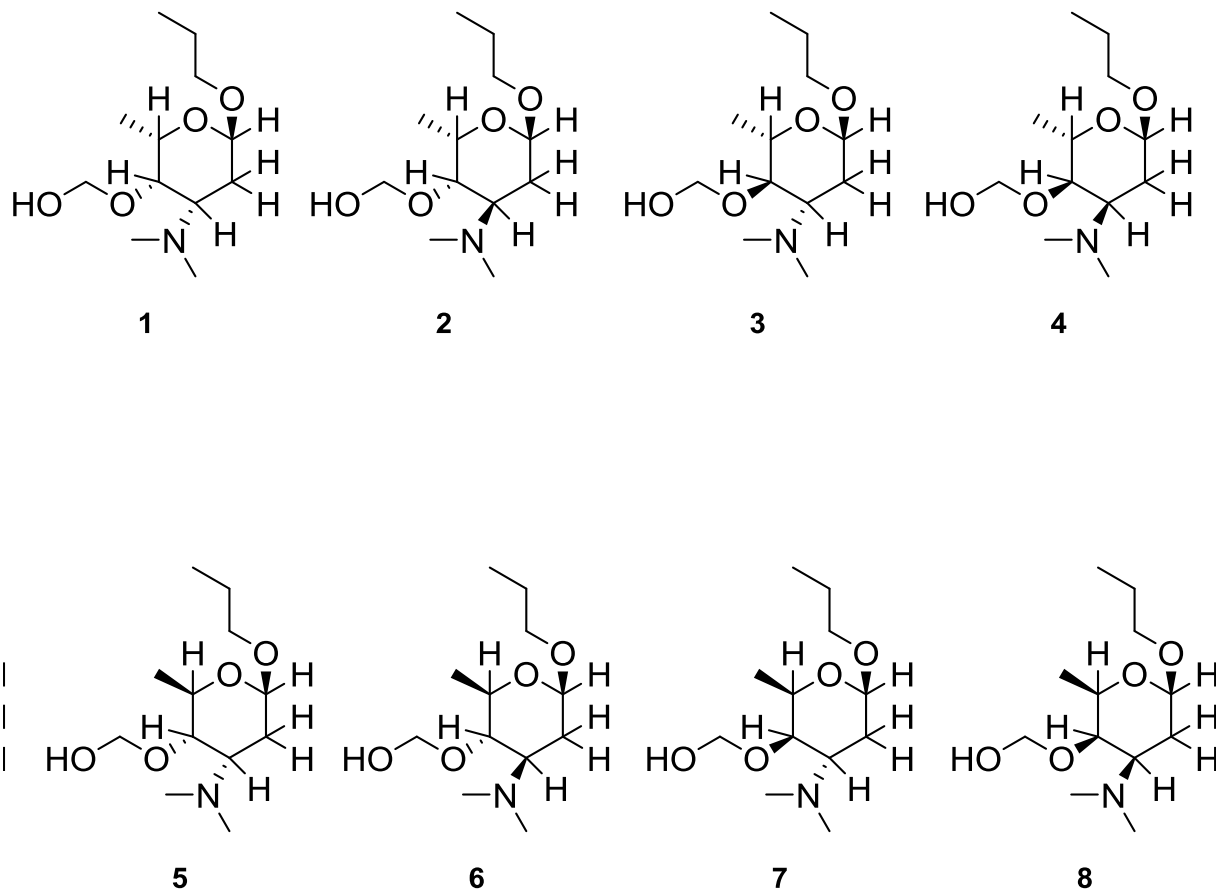

|                 | 1    | $\Delta$ | 2    | $\Delta$ | 3    | $\Delta$ | 4    | $\Delta$ | 5    | $\Delta$ | 6     | $\Delta$ | 7    | $\Delta$ | 8     | $\Delta$ | Experimental |
|-----------------|------|----------|------|----------|------|----------|------|----------|------|----------|-------|----------|------|----------|-------|----------|--------------|
| 1               | 97.6 | 4.3      | 95.2 | 6.7      | 97.4 | 4.5      | 99.0 | 2.9      | 98.9 | 3.0      | 101.2 | 0.7      | 99.1 | 2.8      | 101.4 | 0.5      | 101.9        |
| 2               | 31.3 | 1.2      | 29.0 | 1.1      | 27.7 | 2.4      | 26.0 | 4.1      | 35.8 | 5.7      | 28.7  | 1.4      | 28.8 | 1.3      | 32.4  | 2.3      | 30.1         |
| 3               | 62.5 | 1.4      | 61.3 | 2.6      | 62.0 | 1.9      | 58.9 | 5.0      | 61.7 | 2.2      | 65.8  | 1.9      | 58.1 | 5.8      | 66.5  | 2.6      | 63.9         |
| 4               | 78.8 | 3.3      | 78.7 | 3.2      | 82.2 | 6.7      | 77.0 | 1.5      | 79.7 | 4.2      | 80.8  | 5.3      | 80.1 | 4.6      | 78.1  | 2.6      | 75.5         |
| 5               | 69.7 | 0.2      | 73.3 | 3.4      | 69.1 | 0.9      | 67.9 | 2.0      | 76.0 | 6.1      | 73.7  | 3.8      | 74.6 | 4.7      | 73.3  | 3.4      | 69.9         |
| 6               | 18.7 | 0.2      | 13.7 | 4.8      | 19.4 | 0.9      | 19.4 | 0.9      | 20.1 | 1.6      | 19.2  | 0.7      | 17.8 | 0.7      | 18.6  | 0.1      | 18.5         |
| 7               | 41.0 | 3.6      | 39.0 | 5.6      | 38.9 | 5.7      | 41.7 | 2.9      | 41.4 | 3.2      | 39.3  | 5.3      | 38.7 | 5.9      | 41.3  | 3.3      | 44.6         |
| Sum of $\Delta$ |      | 14.3     |      | 27.4     |      | 22.9     |      | 19.3     |      | 26.0     |       | 19.1     |      | 25.9     |       | 14.7     |              |
| DP4 (%)         | 26.2 |          | 0.1  |          | 0.2  |          | 32.6 |          | 0.0  |          | 1.7   |          | 0.0  |          | 39.2  |          |              |

**Figure S17.** Characterization of sugar S5 using molecular modeling and DFT calculations

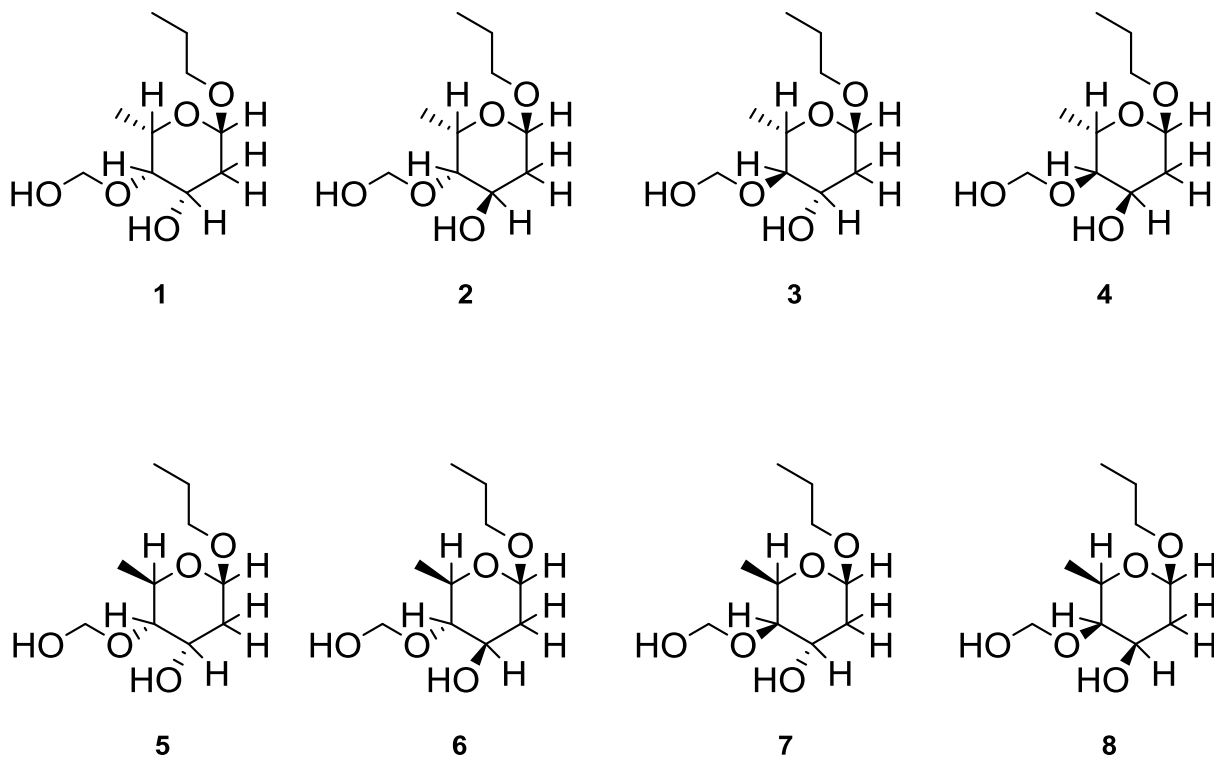

|                 | 1    | $\Delta$ | 2    | $\Delta$ | 3    | $\Delta$ | 4    | $\Delta$ | 5    | $\Delta$ | 6     | $\Delta$ | 7    | $\Delta$ | 8     | 0.3  | Experimental |
|-----------------|------|----------|------|----------|------|----------|------|----------|------|----------|-------|----------|------|----------|-------|------|--------------|
| 1               | 98.9 | 2.2      | 99.6 | 1.5      | 98.1 | 3.0      | 98.8 | 2.3      | 98.4 | 2.7      | 100.9 | 0.2      | 99.9 | 1.2      | 100.8 | 2.7  | 101.1        |
| 2               | 36.6 | 1.4      | 31.7 | 3.5      | 38.1 | 2.9      | 36.8 | 1.6      | 38.5 | 3.3      | 39.1  | 3.9      | 38.8 | 3.6      | 37.9  | 2.8  | 35.2         |
| 3               | 65.3 | 1.0      | 67.8 | 1.5      | 66.8 | 0.5      | 68.5 | 2.2      | 66.4 | 0.1      | 70.0  | 3.7      | 62.8 | 3.5      | 69.1  | 1.8  | 66.3         |
| 4               | 86.0 | 3.1      | 78.7 | 4.2      | 91.5 | 8.6      | 78.7 | 4.2      | 81.2 | 1.7      | 90.8  | 7.9      | 88.2 | 5.3      | 84.7  | 3.2  | 82.9         |
| 5               | 68.1 | 0.5      | 64.0 | 4.6      | 66.5 | 2.1      | 63.9 | 4.7      | 68.8 | 0.2      | 71.0  | 2.4      | 72.9 | 4.3      | 71.8  | 0.8  | 68.6         |
| 6               | 18.3 | 0.9      | 18.3 | 0.9      | 19.2 | 1.8      | 19.0 | 1.6      | 18.9 | 1.5      | 19.1  | 1.7      | 18.2 | 0.8      | 18.2  | 11.7 | 17.4         |
| Sum of $\Delta$ |      | 9.2      |      | 16.2     |      | 18.8     |      | 16.6     |      | 9.4      |       | 19.8     |      | 18.7     |       | 0.3  |              |
| DP4 (%)         | 9.1  |          | 6.5  |          | 0.0  |          | 16.3 |          | 45.9 |          | 0.8   |          | 0.0  |          | 21.4  |      |              |



**Figure S18.** Characterization of sugar S6 using molecular modeling and DFT calculations

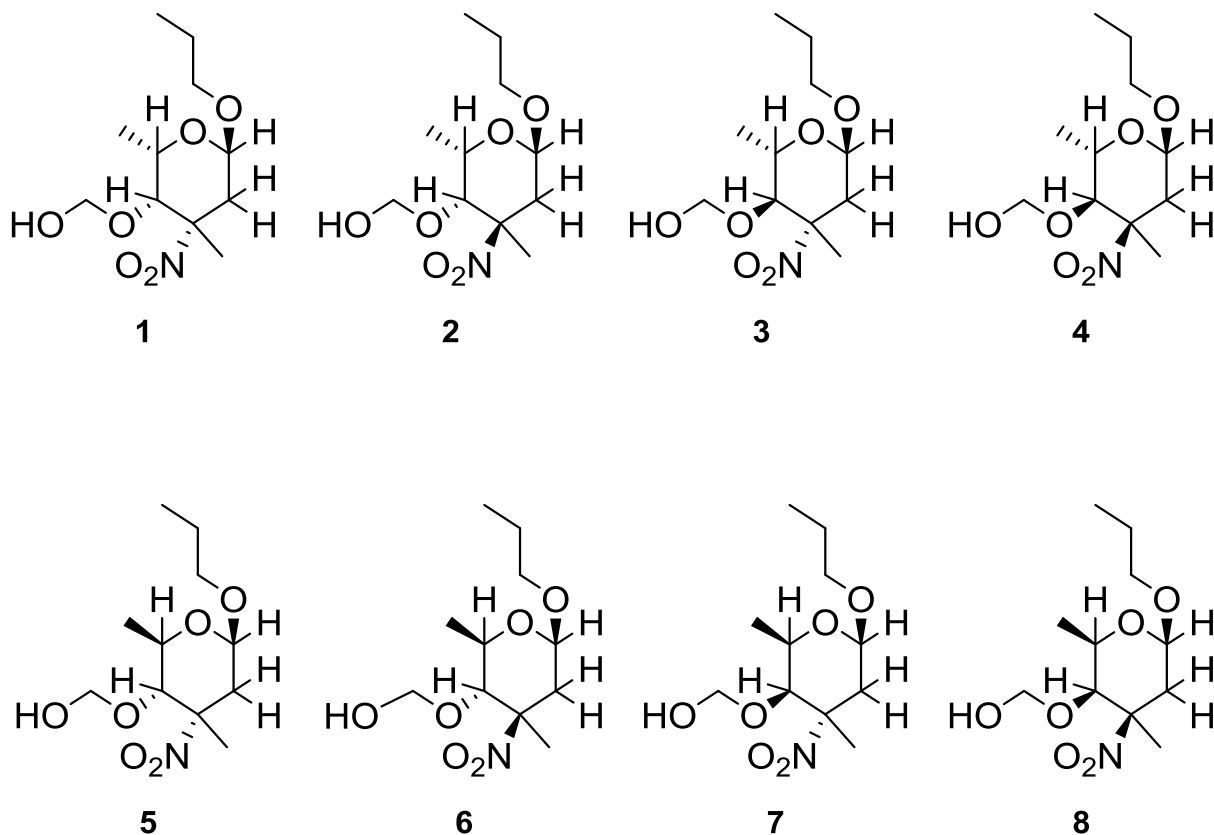

|                 | 1    | $\Delta$ | 2    | $\Delta$ | 3    | $\Delta$ | 4    | $\Delta$ | 5    | $\Delta$ | 6    | $\Delta$ | 7    | $\Delta$ | 8    | $\Delta$ | Experimental |
|-----------------|------|----------|------|----------|------|----------|------|----------|------|----------|------|----------|------|----------|------|----------|--------------|
| 1               | 98.2 | 2.9      | 96.5 | 4.6      | 97.3 | 3.8      | 96.0 | 5.1      | 99.6 | 1.5      | 98.5 | 2.6      | 98.7 | 2.4      | 99.5 | 1.6      | 101.1        |
| 2               | 34.5 | 8.1      | 37.0 | 5.6      | 38.9 | 3.7      | 43.8 | 1.2      | 43.3 | 0.7      | 41.4 | 1.2      | 36.5 | 6.1      | 36.9 | 5.7      | 42.6         |
| 3               | 92.2 | 1.9      | 88.3 | 2.0      | 94.3 | 4.0      | 87.6 | 2.7      | 91.8 | 1.5      | 94.5 | 4.2      | 92.9 | 2.6      | 92.9 | 2.6      | 90.3         |
| 4               | 76.6 | 8.3      | 77.7 | 7.2      | 80.9 | 4.0      | 80.9 | 4.0      | 86.0 | 1.1      | 81.6 | 3.3      | 75.7 | 9.2      | 73.3 | 11.6     | 84.9         |
| 5               | 66.9 | 4.9      | 65.6 | 6.2      | 67.2 | 4.6      | 66.6 | 5.2      | 71.1 | 0.7      | 71.7 | 0.1      | 70.7 | 1.1      | 71.3 | 0.5      | 71.8         |
| 6               | 19.0 | 0.0      | 17.7 | 1.3      | 18.5 | 0.5      | 19.0 | 0.0      | 19.1 | 0.1      | 19.1 | 0.1      | 18.7 | 0.3      | 18.9 | 0.1      | 19.0         |
| 7               | 26.2 | 0.7      | 26.0 | 0.5      | 19.4 | 6.1      | 27.5 | 2.0      | 27.0 | 1.5      | 20.0 | 5.5      | 27.0 | 1.5      | 24.4 | 1.1      | 25.5         |
| Sum of $\Delta$ |      | 26.1     |      | 27.0     |      | 20.6     |      | 18.2     |      | 5.6      |      | 11.5     |      | 21.7     |      | 22.1     |              |
| DP4 (%)         | 0.0  |          | 0.0  |          | 0.1  |          | 17.4 |          | 64.6 |          | 0.1  |          | 0.0  |          | 17.8 |          |              |

**Figure S19.** Characterization of sugar S7 using molecular modeling and DFT calculations



|   | 1    | $\Delta$ | 2    | $\Delta$ | 3    | $\Delta$ | 4    | $\Delta$ | 5    | $\Delta$ | 6     | $\Delta$ | 7    | $\Delta$ | 8     | $\Delta$ | Experimental |
|---|------|----------|------|----------|------|----------|------|----------|------|----------|-------|----------|------|----------|-------|----------|--------------|
| 1 | 98.1 | 5.0      | 99.3 | 3.8      | 98.3 | 4.8      | 97.8 | 5.3      | 98.2 | 4.9      | 100.4 | 2.7      | 99.3 | 3.8      | 100.6 | 2.5      | 103.1        |
| 2 | 36.5 | 2.7      | 31.9 | 1.9      | 39.9 | 6.1      | 36.0 | 2.2      | 39.7 | 5.9      | 40.5  | 6.7      | 35.4 | 1.6      | 37.9  | 4.1      | 33.8         |
| 3 | 65.8 | 0.9      | 69.3 | 2.6      | 70.9 | 4.2      | 68.6 | 1.9      | 70.8 | 4.1      | 73.2  | 6.5      | 71.9 | 5.2      | 68.8  | 2.1      | 66.7         |
| 4 | 72.6 | 0.3      | 71.6 | 0.7      | 77.6 | 5.3      | 71.5 | 0.8      | 74.1 | 1.8      | 78.3  | 6.0      | 71.8 | 0.5      | 71.9  | 0.4      | 72.3         |
| 5 | 67.2 | 1.9      | 64.9 | 4.2      | 69.2 | 0.1      | 67.7 | 1.4      | 71.1 | 2.0      | 72.8  | 3.7      | 70.7 | 1.6      | 72.4  | 3.3      | 69.1         |
| 6 | 18.1 | 1.0      | 17.9 | 0.8      | 18.8 | 1.7      | 18.8 | 1.7      | 18.9 | 1.8      | 18.5  | 1.4      | 17.6 | 0.5      | 17.9  | 0.8      | 17.1         |

**Figure S20.** Characterization of anthracycline core using molecular modeling and DFT calculations

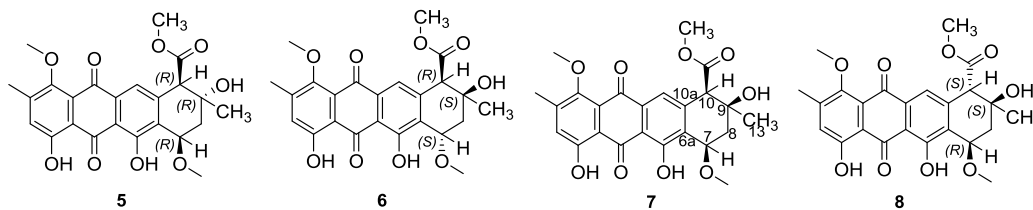

|                  | <b>5</b> | $\Delta$ | <b>6</b> | $\Delta$ | <b>7</b> | $\Delta$ | <b>8</b> | $\Delta$ | Experimental |
|------------------|----------|----------|----------|----------|----------|----------|----------|----------|--------------|
| 6a               | 128.5    | 3.7      | 129.0    | 3.2      | 126.7    | 5.5      | 127.0    | 5.2      | 132.2        |
| 7                | 71.7     | 1.1      | 72.9     | 0.1      | 70.2     | 2.6      | 73.0     | 0.2      | 72.8         |
| 8                | 39.3     | 0.7      | 37.4     | 2.6      | 42.7     | 2.7      | 32.6     | 7.4      | 40.0         |
| 9                | 71.5     | 1.2      | 72.9     | 2.6      | 71.3     | 1.0      | 72.0     | 1.7      | 70.3         |
| 10               | 60.6     | 1.2      | 58.7     | 0.7      | 60.6     | 1.2      | 60.7     | 1.3      | 59.4         |
| 10a              | 139.4    | 5.4      | 141.2    | 3.6      | 145.2    | 0.4      | 142.1    | 2.7      | 144.8        |
| 13               | 26.6     | 3.6      | 30.7     | 0.5      | 31.2     | 1.0      | 27.4     | 2.8      | 30.2         |
| COO              | 165.9    | 7.0      | 165.1    | 7.8      | 165.0    | 7.9      | 166.3    | 6.6      | 172.9        |
| OCH <sub>3</sub> | 51.2     | 1.8      | 51.2     | 1.8      | 51.0     | 2.0      | 51.4     | 1.6      | 53.0         |
| Sum of $\Delta$  |          | 25.7     |          | 22.9     |          | 24.3     |          | 29.5     |              |
| DP4 (%)          | 49.1     |          | 41.9     |          | 8.8      |          | 0.2      |          |              |

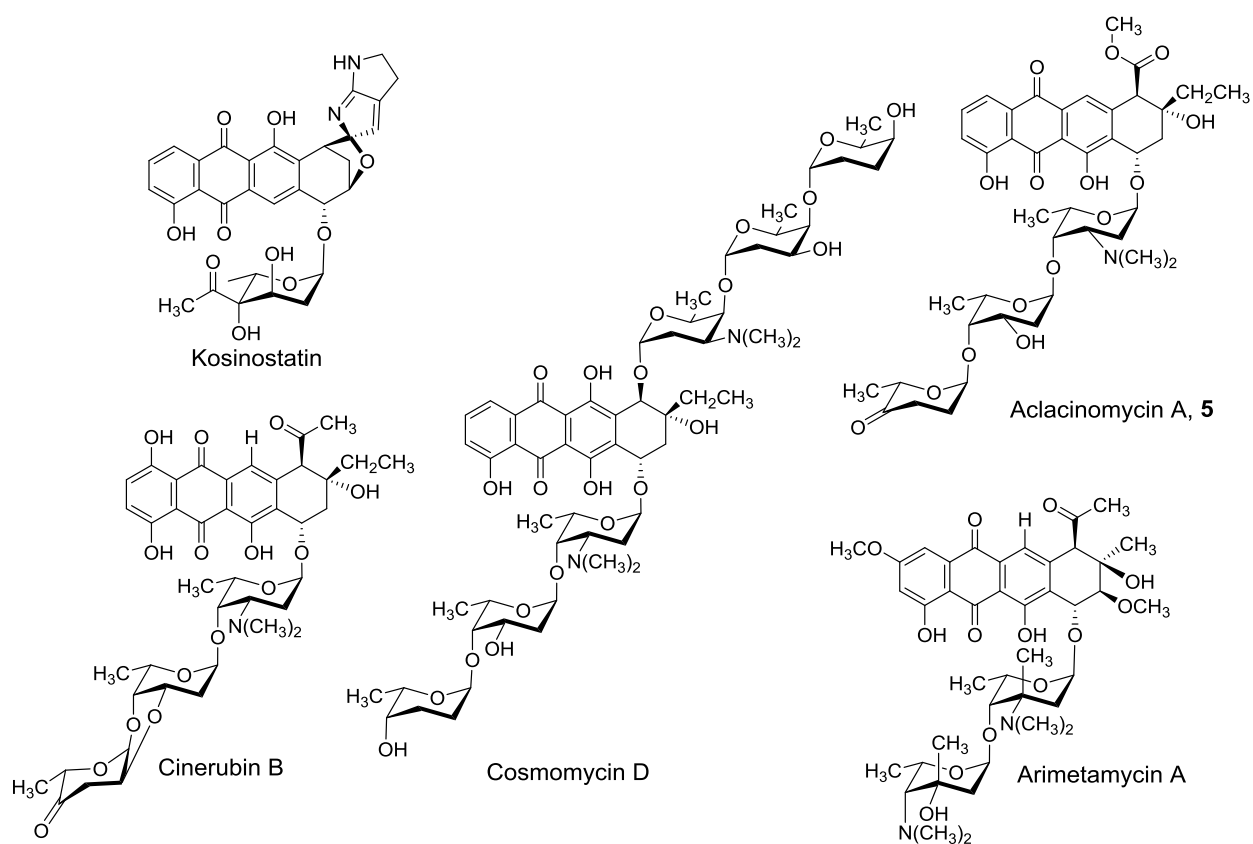

**Figure S21.** Structures of natural products sharing biosynthetic and structural similarities to keyicin.

**Figure S22.** Clustered chemical genomics profile generated using a barcoded *E. coli* deletion collection. Cell populations were treated with either keyicin (12.5 $\mu$ g/mL), methyl methanesulfonate (MMS, 0.0125%), or ethidium bromide (EtBr, 100 $\mu$ g/mL). MMS and EtBr are established DNA damaging agents. Red indicates negative genetic interactions between gene mutants and compounds relative to solvent (DMSO) control. Each profile represents the average of 3 independent replicates.

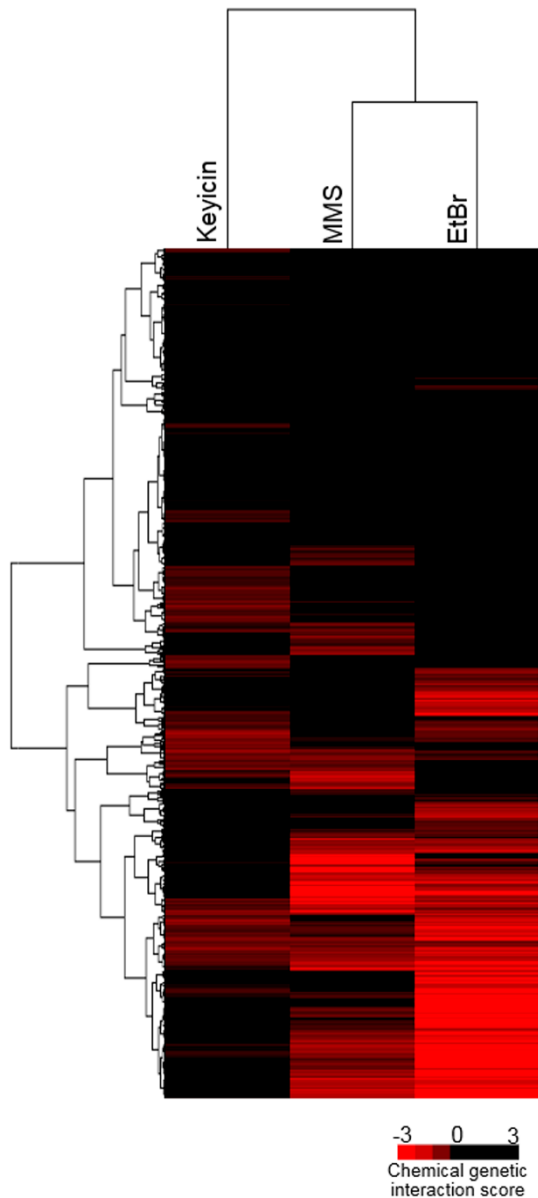

Table S3. Summary of BGC genes identified in *Micromonospora* sp. WMMB-235 with proposed roles in keycin biosynthesis on basis of comparisons to nogalamycin BGC components.

| kyc Gene Name | kyc Accession # | Nogalamycin (BGC0000250) Gene Name | Nogalamycin (BGC0000250) Accession # | Protein Percent Identity | E-value | MiBiG Annotation (putative function of gene product)                                 |
|---------------|-----------------|------------------------------------|--------------------------------------|--------------------------|---------|--------------------------------------------------------------------------------------|
| kyc7          | OHX07111.1      | snogK                              | AAF01814.1                           | 44.04                    | 5E-86   | putative dTDP-glucose-4,6-dehydratase                                                |
| kyc8          | OHX01512.1      | snogJ                              | AAF01820.1                           | 74.31                    | 8E-159  | putative dTDP-glucose synthase, glucose-1-phosphate adenyllyl/thymidyllyltransferase |
| kyc9          | OHX01513.1      | snoaM                              | AAF01818.1                           | 77.99                    | 5E-148  | putative polyketide cyclase                                                          |
| kyc10         | OHX07112.1      | snoO                               | AAF01807.1                           | 52.6                     | 6E-40   | Nuclear transport factor 2 (NTF2-like) superfamily                                   |
| kyc12         | OHX01515.1      | snogE                              | AAF01809.1                           | 43.02                    | 2E-87   | putative glycosyl transferase                                                        |
| kyc13         | OHX01516.1      | snoa1                              | CAA12017.1                           | 65.71                    | 0       | KSI (minimal PKS), Beta-ketoacyl synthase                                            |
| kyc14         | OHX01517.1      | snoa2                              | CAA12018.1                           | 62.03                    | 2E-167  | KSI (minimal PKS), Beta-ketoacyl synthase                                            |
| kyc15         | OHX01518.1      | snoa3                              | CAA12019.1                           | 48.15                    | 6E-17   | ACP, polyketide                                                                      |
| kyc17         | OHX01520.1      | snoK                               | AAF01812.1                           | 62                       | 3E-116  | non-heme iron $\alpha$ -ketoglutarate ( $\alpha$ -KG)-dependent carbocyclase         |
| kyc19         | OHX01522.1      | snoG                               | AAF01816.1                           | 37.93                    | 3E-89   | SMCOG1248:methyltransferase                                                          |
| kyc20         | OHX01523.1      | snogE                              | AAF01809.1                           | 46.51                    | 1E-101  | putative glycosyl transferase                                                        |
| kyc21         | OHX01524.1      | snoaE                              | CAA12012.1                           | 53.31                    | 4E-111  | aromatase, polyketide                                                                |
| kyc22         | OHX01525.1      | snoaD                              | CAA12013.1                           | 74.62                    | 6E-133  | polyketide ketoreductase, short-chain_dehydrogenase/reductase_SDR                    |
| kyc24         | OHX07113.1      | snogE                              | AAF01809.1                           | 45.73                    | 4E-99   | putative glycosyl transferase                                                        |
| kyc25         | OHX01526.1      | snogE                              | AAF01809.1                           | 61.87                    | 4E-178  | putative glycosyl transferase                                                        |
| kyc26         | OHX01527.1      | snogN                              | AAF01817.1                           | 42.62                    | 3E-57   | SMCOG1007:cytochrome_P450                                                            |
| kyc27         | OHX01528.1      | snogG                              | CAA12010.1                           | 54.58                    | 7E-104  | putative dTDP-4-keto-6-deoxyhexose reductase                                         |
| kyc28         | OHX01529.1      | snogF                              | CAA12011.1                           | 68.16                    | 3E-97   | 3,5-epimerase                                                                        |
| kyc29         | OHX01530.1      | snogE                              | AAF01809.1                           | 41.33                    | 1E-83   | putative glycosyl transferase                                                        |
| kyc31         | OHX01532.1      | snoaW                              | AAF01810.1                           | 50.88                    | 4E-80   | putative hydroxylase                                                                 |
| kyc32         | OHX01533.1      | snogE                              | AAF01809.1                           | 43.55                    | 2E-88   | putative glycosyl transferase                                                        |
| kyc32         | OHX01533.1      | snogZ                              | CAB59003.1                           | 28.47                    | 4E-28   | putative dTDP-4-dehydrorhamnose reductase, NAD-dependent epimerase/dehydratase       |
| kyc33         | OHX01534.1      | snoaF                              | AAF01806.1                           | 58.37                    | 3E-96   | C-7 ketoreductase                                                                    |
| kyc34         | OHX01535.1      | snoaL                              | AAF01813.1                           | 77.78                    | 2E-79   | nogalonic acid methyl ester cyclase                                                  |
| kyc35         | OHX07114.1      | snoaC                              | CAA12014.1                           | 63.83                    | 3E-120  | methyltransferase, aklanonic acid                                                    |
| kyc36         | OHX01536.1      | snoaW                              | AAF01810.1                           | 60.73                    | 6E-99   | putative hydroxylase                                                                 |
| kyc38         | OHX01538.1      | snoaB                              | CAA12015.1                           | 60.92                    | 1E-32   | oxygenase, polyketide                                                                |
| kyc42         | OHX01541.1      | snorA                              | CAA12016.1                           | 53.23                    | 7E-178  | activator, polyketide                                                                |
| kyc44         | OHX01543.1      | snogA                              | AAF01819.1                           | 66.81                    | 5E-111  | putative amino methyltransferase                                                     |
| kyc45         | OHX01544.1      | snogI                              | AAF01821.1                           | 73.68                    | 0       | putative aminotransferase, DegT/Dnri/EryC1/StrS aminotransferase                     |
| kyc46         | OHX01545.1      | snogH                              | CAA12009.1                           | 57.45                    | 0       | putative 2,3-dehydratase                                                             |
| kyc48         | OHX01546.1      | snogZ                              | CAB59003.1                           | 62.96                    | 9E-167  | putative dTDP-4-dehydrorhamnose reductase, NAD-dependent epimerase/dehydratase       |
| kyc50         | OHX01548.1      | snogX                              | CAA12020.1                           | 59.4                     | 2E-98   | putative N-methylase                                                                 |
| kyc51         | OHX01549.1      | snoL                               | AAF01808.1                           | 63.16                    | 6E-61   | Snoal-like polyketide cyclase; pfam07366                                             |
| kyc52         | OHX01550.1      | snogD                              | AAF01811.1                           | 64.89                    | 1E-159  | putative glycosyl transferase, MGT family                                            |
| kyc54         | OHX01552.1      | snorA                              | CAA12016.1                           | 35.47                    | 3E-76   | activator, polyketide                                                                |
| kyc62         | OHX01559.1      | snorA                              | CAA12016.1                           | 35.87                    | 4E-73   | activator, polyketide                                                                |

**Table S4.** Selected GTs from anthracycline BGCs with similarity to putative kyc GTs

| kyc Accession # | SEARCHGT Consensus | Predicted Substrate/Function                       | Reference (PMID)   |
|-----------------|--------------------|----------------------------------------------------|--------------------|
| OHX01515.1      | AknK               | L-2-deoxyfucose                                    | 15078101           |
| OHX01523.1      | AknK               | L-2-deoxyfucose                                    | 15078101           |
| OHX07113.1      | AknK               | L-2-deoxyfucose                                    | 15078101           |
| OHX01526.1      | SnogE              | Nogalose                                           | 22120896           |
| OHX01530.1      | AknK               | L-2-deoxyfucose                                    | 15078101           |
| OHX01533.1      | AknK, dauH         | L-2-deoxyfucose, L-daunosamine                     | 15078101, 8655529  |
| OHX01546.1      | SnogZ              | Redundant; can activate other glycosyltransferases | 22120896, 25524457 |
| OHX01550.1      | SnogD              | Nogalamine                                         | 22120896           |

**Table S5.** Overview of overall cluster similarities between kyc cluster and other anthracycline members**ClusterBlast (antiSMASH 4)**

| Cluster       | MIBiG Accession | Percent of Genes Similar to kyc cluster |
|---------------|-----------------|-----------------------------------------|
| Cinerubin B   | BGC0000212      | 88%                                     |
| Cosmomycin D  | BGC0001074      | 88%                                     |
| Arimetamycin  | BGC0000199      | 84%                                     |
| Kosinostatin  | BGC0001073      | 76%                                     |
| Aclacinomycin | BGC0000191      | 72%                                     |
| Nogalamycin   | BGC0000250      | 52%                                     |
| Aclacinomycin | BGC0000192      | 44%                                     |
| BE-7585A      | BGC0000203      | 40%                                     |
| Cosmomycin    | BGC0000214      | 24%                                     |

**Table S6:** Average chemical genetic interaction profiles for keyicin (12.5 µg/mL), ethidium bromide (EtBr, 100µg/mL), and methyl methanesulfonate (MMS, 0.0125%)

| Gene | Keyicin   | MMS      | EtBr      |
|------|-----------|----------|-----------|
| yegP | -0.329342 | 0.764072 | 0.108858  |
| allC | -0.631506 | 1.348474 | 0.230172  |
| slyA | -1.029156 | 3.312604 | 0.894277  |
| acrR | -0.870094 | 2.634704 | 0.747246  |
| melR | -0.416204 | 1.474132 | 0.409495  |
| fliJ | -0.465341 | 1.599695 | 0.409426  |
| mutM | -0.598777 | 1.274581 | 0.349647  |
| ksgA | -1.178998 | 3.060106 | 0.814421  |
| nhaA | -0.428125 | 1.02815  | 0.28988   |
| fliG | -0.688832 | 1.915999 | 0.726952  |
| entD | -0.625749 | 1.527119 | 0.580673  |
| ynaJ | -0.475413 | 1.469073 | 0.111823  |
| fimA | -0.826211 | 3.402978 | 0.312207  |
| purK | -1.509718 | 5.516694 | 0.64496   |
| gpp  | -0.649773 | 2.420248 | 0.264966  |
| djlA | -0.879816 | 3.584505 | 0.596893  |
| aroF | -0.02916  | 0.952117 | 0.085389  |
| fliC | -0.107722 | 1.593072 | 0.23363   |
| sucD | -0.064182 | 1.128427 | 0.165592  |
| yafV | -0.11706  | 1.746174 | 0.296911  |
| rpmF | -0.059291 | 0.541752 | 0.076701  |
| yadE | -0.17007  | 1.493138 | 0.118234  |
| sixA | 0.339052  | 6.318928 | 0.795778  |
| kefC | 0.072222  | 2.22186  | 0.273984  |
| gadX | 0.130399  | 3.071498 | 0.482787  |
| ypjD | -0.152502 | 5.723593 | 0.930226  |
| htrE | 0.001045  | 1.17862  | 0.202515  |
| yqgE | -0.007739 | 1.495201 | 0.258224  |
| fimH | -0.351876 | 3.431692 | 0.732845  |
| ygjH | -0.099778 | 0.683142 | 0.162068  |
| plsX | -0.36295  | 1.944811 | 0.320535  |
| ybdM | -0.405749 | 2.456645 | 0.431262  |
| nmpC | 0.616897  | 3.519173 | -0.11073  |
| fliE | 0.255315  | 1.650448 | -0.018023 |
| hscC | 0.122743  | 0.871652 | 0.012743  |
| cheR | 0.176267  | 1.680984 | -0.053454 |
| hslJ | 0.062998  | 0.897902 | -0.019584 |
| yhfW | 0.034412  | 3.549235 | -0.047718 |
| yfaQ | -0.010183 | 0.653952 | 0.017471  |
| ccmD | 0.005102  | 1.436231 | -0.091092 |
| tatE | -0.01422  | 1.30812  | -0.070064 |
| purN | 0.130836  | 2.953256 | -0.410946 |
| aroG | 0.062556  | 1.390407 | -0.162648 |
| srmB | -0.456322 | 5.567656 | -0.700622 |
| yadL | -0.307596 | 2.03151  | -0.301795 |
| sgcE | -0.113358 | 0.80459  | -0.070139 |
| srlR | -0.071762 | 0.584869 | -0.036864 |
| ybfE | -0.464418 | 3.512956 | -0.149563 |
| nagC | -0.247906 | 1.671148 | -0.002693 |
| yhdX | 0.345778  | 1.768078 | 0.437188  |
| carA | 0.61049   | 3.389678 | 0.87466   |
| yhcM | 0.537575  | 3.094197 | 0.882815  |
| hflK | 0.88401   | 7.20492  | 1.816648  |
| nudH | 0.426033  | 2.930722 | 0.738854  |
| rfbB | 0.27754   | 1.818569 | 0.407465  |
| icd  | 0.147459  | 2.311789 | 0.565154  |
| mngA | 0.171425  | 1.349674 | 0.461102  |



|      |           |          |          |
|------|-----------|----------|----------|
| carB | 0.375268  | 3.691857 | 1.092057 |
| wbbH | 0.222823  | 2.850715 | 0.859224 |
| ydiE | -0.017939 | 1.113463 | 0.492941 |
| ybbN | -0.060934 | 2.852219 | 1.349213 |
| hemY | -0.132469 | 3.82119  | 1.553486 |
| rmuC | -0.0127   | 0.990425 | 0.409382 |
| pinH | -0.022555 | 1.481046 | 0.602467 |
| panF | 0.029781  | 2.82718  | 1.131062 |
| rihA | 0.003122  | 1.118937 | 0.436346 |
| ygbE | 0.020879  | 0.774621 | 0.325112 |
| hycF | 0.03662   | 1.776957 | 0.630032 |
| xseA | 0.153655  | 2.678238 | 0.945267 |
| damX | 0.049005  | 2.599833 | 0.82121  |
| deoC | 0.007172  | 1.277752 | 0.387417 |
| aaeA | -0.005158 | 1.158508 | 0.360847 |
| ydcM | -0.0186   | 0.723416 | 0.229699 |
| marR | -0.176209 | 4.188716 | 1.143488 |
| dsbB | -0.073026 | 1.986883 | 0.530452 |
| yeiR | -0.249033 | 3.751146 | 0.90887  |
| ytfP | 0.215915  | 0.809653 | 0.369644 |
| yfcT | 0.702948  | 2.4397   | 1.12828  |
| gspC | 0.195     | 0.700294 | 0.351967 |
| treR | 0.977189  | 3.462828 | 1.72944  |
| ybcI | 0.303462  | 1.255507 | 0.594339 |
| ccmB | 0.730346  | 3.249693 | 1.560382 |
| flhB | 0.628927  | 2.322831 | 1.296677 |
| rfaS | 0.977912  | 3.546368 | 1.95947  |
| menD | 0.140028  | 1.480801 | 0.708735 |
| gltD | 0.213204  | 2.229872 | 1.054266 |
| corA | 0.397566  | 3.760667 | 1.653815 |
| yidR | 0.972813  | 4.986153 | 2.650047 |
| flhA | 0.611414  | 3.399494 | 1.752683 |
| gntT | 0.202563  | 1.353316 | 0.573517 |
| fbp  | 0.186259  | 1.336412 | 0.601832 |
| dacA | 0.263031  | 1.385492 | 0.606649 |
| ygfZ | 0.291745  | 1.503309 | 0.709801 |
| treB | 0.214413  | 1.271796 | 0.60951  |
| greA | 1.148956  | 5.997074 | 2.355075 |
| rpmB | 0.597399  | 3.424233 | 1.222948 |
| glnD | 0.27222   | 1.557026 | 0.571566 |
| yjiQ | 0.209933  | 0.868493 | 0.336821 |
| yadM | 0.443004  | 1.831571 | 0.730366 |
| ydjI | 0.040133  | 0.179906 | 0.068983 |
| ilvI | 0.224975  | 0.978724 | 0.35855  |
| proP | 0.777294  | 2.724546 | 0.7144   |
| pfkA | 1.131365  | 3.128974 | 1.004922 |
| yqjG | 0.64012   | 2.099258 | 0.703218 |
| yeaP | 0.705403  | 1.84922  | 0.476159 |
| sapF | -0.292639 | 2.596334 | 1.236153 |
| pyrC | -0.678052 | 4.684748 | 2.04726  |
| xseB | -0.210825 | 1.045087 | 0.470261 |
| ompF | -0.2315   | 0.933385 | 0.396045 |
| fimF | -0.659518 | 3.643505 | 1.102932 |
| glnG | -0.280179 | 1.454442 | 0.397268 |
| chpR | -0.246792 | 1.300259 | 0.472174 |
| yfcS | -0.256441 | 1.699787 | 0.626043 |
| ybcM | -0.177413 | 1.156795 | 0.403038 |
| pyrB | -0.23631  | 1.922536 | 1.198125 |
| yeaW | -0.323611 | 2.025504 | 1.354613 |
| trpB | -0.361867 | 1.879787 | 1.139543 |
| yfiN | -0.245298 | 1.04961  | 0.764317 |

|      |           |          |          |
|------|-----------|----------|----------|
| yeeT | -0.373325 | 1.419544 | 0.779523 |
| yeeA | -0.225456 | 0.805646 | 0.428648 |
| yfbB | -0.547616 | 2.413623 | 1.340384 |
| yhdN | -2.158055 | 6.398396 | 3.063373 |
| ybhE | 0.273244  | 2.964181 | 1.571024 |
| ycdM | 0.050574  | 1.413153 | 0.745962 |
| fliO | 0.064128  | 1.077634 | 0.590232 |
| yjeF | 0.02355   | 0.609988 | 0.336787 |
| yjfO | -0.078983 | 1.10046  | 0.563091 |
| rep  | -0.247203 | 2.122735 | 1.187437 |
| ubiC | -0.2891   | 3.266067 | 1.778717 |
| yebV | -0.088152 | 1.027924 | 0.559154 |
| nfo  | -0.126114 | 1.471383 | 0.808157 |
| ycfH | -0.025708 | 1.098885 | 0.573318 |
| uvrY | 0.004948  | 0.677221 | 0.417469 |
| rcsD | 0.041986  | 3.621432 | 2.26941  |
| fliP | -0.010462 | 1.854856 | 1.14333  |
| yneK | 0.022063  | 1.018786 | 0.619011 |
| cheB | -0.038631 | 0.716549 | 0.484366 |
| purD | -0.245943 | 4.034187 | 2.392316 |
| yhjJ | -0.080127 | 1.53669  | 0.9252   |
| purC | -0.195615 | 3.737383 | 2.290535 |
| prpR | -0.151114 | 2.623963 | 1.623959 |
| yehS | -0.054727 | 1.658995 | 0.96271  |
| wzxE | 2.589645  | 3.542018 | 0.190494 |
| atpA | 1.659964  | 2.798407 | 0.19418  |
| ycjM | 0.04464   | 0.070126 | 0.002985 |
| ybiV | 0.716497  | 1.375188 | 0.026048 |
| ubiF | 0.606145  | 1.448189 | 0.212689 |
| ycel | 0.500794  | 1.030146 | 0.141379 |
| yjjK | 1.433726  | 1.494648 | 0.330658 |
| yebO | 0.713283  | 0.814686 | 0.275894 |
| yidP | 1.092613  | 1.291693 | 0.515222 |
| hscB | 0.997225  | 1.226131 | 0.293042 |
| metC | 0.285669  | 0.391109 | 0.104025 |
| yddG | 0.743764  | 1.513341 | 0.587615 |
| rffC | 1.574616  | 2.974908 | 1.17877  |
| citB | 0.547945  | 1.077233 | 0.488339 |
| ybaP | 0.926065  | 1.82338  | 0.602332 |
| hepA | 1.86874   | 3.65565  | 1.080289 |
| ggt  | 0.286656  | 0.507991 | 0.103412 |
| yicR | 0.549793  | 1.028757 | 0.272092 |
| ypdJ | 0.211667  | 0.409508 | 0.093474 |
| rpiB | 0.5206    | 0.824172 | 0.247902 |
| ytfB | 0.507816  | 0.772281 | 0.2046   |
| proX | 0.382998  | 0.624652 | 0.149147 |
| yghY | 0.805999  | 1.194186 | 0.421188 |
| yihP | 2.089957  | 3.012759 | 1.060114 |
| proV | 0.663635  | 1.342506 | 1.015708 |
| dcuB | 0.296644  | 0.621613 | 0.454526 |
| iadA | 0.800565  | 1.55201  | 1.117765 |
| fadB | 1.231357  | 2.479296 | 1.991824 |
| yraQ | 0.55687   | 1.14613  | 0.928945 |
| ybdZ | 0.424033  | 0.997572 | 0.747063 |
| mhpD | 0.278509  | 0.618149 | 0.455226 |
| fliD | 0.796459  | 1.886132 | 1.47792  |
| guaB | 1.113993  | 2.610915 | 2.113615 |
| cycA | 0.332172  | 0.862839 | 0.623904 |
| gshB | 0.93054   | 2.458054 | 1.90206  |
| melA | 0.654491  | 1.798792 | 1.449507 |
| ilvN | 1.127614  | 2.492656 | 1.639773 |

|      |           |          |          |
|------|-----------|----------|----------|
| ulaF | 0.414376  | 0.987832 | 0.65247  |
| fre  | 1.081354  | 2.589297 | 1.481538 |
| yjgF | 1.123148  | 2.703039 | 1.633879 |
| galR | 1.430089  | 3.137223 | 1.81957  |
| yigE | 0.721584  | 1.961284 | 1.14718  |
| ykgC | 0.868366  | 2.311195 | 1.456686 |
| fruK | 1.192641  | 3.271744 | 1.760884 |
| purH | 1.858394  | 4.504509 | 2.291047 |
| yafD | 1.466401  | 3.969014 | 1.825301 |
| rffA | 1.83639   | 4.478025 | 2.067261 |
| yfbF | 0.715643  | 1.722769 | 0.745692 |
| yihQ | 1.60365   | 1.739261 | 1.152241 |
| nuoA | 0.833874  | 0.869212 | 0.660428 |
| uhpB | 1.744364  | 1.684452 | 1.474557 |
| yihT | 1.49784   | 1.578119 | 1.296421 |
| trmU | 2.103505  | 2.248398 | 1.931201 |
| yagQ | 2.124576  | 2.211217 | 1.978696 |
| glpF | 2.886486  | 3.43355  | 3.000012 |
| hdeB | 1.477056  | 1.858118 | 1.664095 |
| ydbH | 2.219461  | 2.841275 | 2.544372 |
| trmE | 2.202168  | 3.87448  | 2.529218 |
| fliN | 1.236032  | 2.178936 | 1.299676 |
| ydgD | 0.521921  | 0.889276 | 0.472497 |
| crcA | 0.7723    | 1.182522 | 0.876367 |
| thiQ | 0.68948   | 1.048486 | 0.736681 |
| yrfF | 1.086706  | 1.561993 | 0.96192  |
| pepA | 0.911022  | 1.23474  | 0.752544 |
| garD | 0.722755  | 0.920201 | 0.539227 |
| yliD | 0.219924  | 0.289047 | 0.166262 |
| dgt  | -0.424501 | 3.32386  | 3.190834 |
| emrD | -0.19504  | 1.103344 | 1.181615 |
| rnt  | -0.100884 | 0.690521 | 0.702689 |
| yqiK | -0.13729  | 0.764373 | 0.768971 |
| bgfF | -0.327665 | 1.552915 | 1.459226 |
| narH | -0.162685 | 1.821914 | 1.870435 |
| yefM | -0.250528 | 2.584157 | 2.608309 |
| pflD | -0.104801 | 1.10545  | 1.169031 |
| sucC | -0.24899  | 4.298513 | 4.27361  |
| rlpA | -0.104192 | 1.8794   | 1.869213 |
| rffT | -0.136167 | 1.166395 | 0.999999 |
| yeeS | -0.475965 | 2.793648 | 2.398328 |
| rsxB | -0.117404 | 0.781513 | 0.688307 |
| purF | -0.74485  | 5.980206 | 4.702888 |
| panC | -0.259695 | 2.363781 | 1.895955 |
| pspC | -0.071803 | 0.778184 | 0.604963 |
| yjdF | -0.185414 | 1.482578 | 1.109817 |
| mepA | -0.122181 | 0.904781 | 0.67841  |
| yodB | -0.174066 | 1.153712 | 0.900773 |
| hdeD | -0.070299 | 0.991536 | 0.847344 |
| ydiQ | -0.167781 | 2.105805 | 1.818741 |
| yafJ | -0.13153  | 2.017036 | 1.862751 |
| cpxP | -0.05479  | 0.787653 | 0.705368 |
| rbsA | -0.117277 | 2.395245 | 1.869496 |
| yehH | -0.117054 | 1.937001 | 1.463567 |
| gpt  | -0.100928 | 2.494449 | 2.029842 |
| glxK | -0.093997 | 3.075377 | 3.63804  |
| hrpB | -0.129802 | 2.332702 | 2.792169 |
| abgR | -0.070603 | 1.281019 | 1.466331 |
| yrfG | -0.207805 | 1.607583 | 1.915489 |
| ulaD | -0.152018 | 1.306985 | 1.577085 |
| ymfN | -0.197322 | 2.090622 | 2.453329 |

|      |           |          |          |
|------|-----------|----------|----------|
| pdxB | -0.127902 | 0.986442 | 1.239476 |
| yacG | -0.148655 | 2.529613 | 3.302559 |
| flgG | -0.091534 | 1.484098 | 1.977286 |
| glpQ | -0.080705 | 1.951048 | 2.52824  |
| yhbQ | -0.052417 | 1.041505 | 1.445073 |
| leuD | 0.08868   | 2.307407 | 2.774462 |
| yehY | 0.151728  | 2.772002 | 3.326154 |
| yahl | 0.051754  | 2.908746 | 3.546565 |
| rzpD | -0.042711 | 2.686489 | 2.955147 |
| kbl  | 0.035513  | 1.582514 | 1.763478 |
| ycbY | 0.061512  | 2.104783 | 2.207771 |
| panB | 0.38673   | 5.213384 | 3.779746 |
| ybeZ | 0.173301  | 2.824089 | 1.971485 |
| clpB | 0.001378  | 0.074799 | 0.053908 |
| flu  | 0.517484  | 3.38926  | 1.966362 |
| ptsN | 0.403599  | 3.680546 | 2.228696 |
| yfaE | 0.104635  | 1.333333 | 0.777174 |
| gltA | 0.351254  | 3.076    | 2.02124  |
| cheZ | 0.179542  | 1.478656 | 1.021118 |
| purL | 0.701374  | 4.337102 | 3.006018 |
| yneE | 0.093652  | 0.622574 | 0.4054   |
| nadR | 0.768271  | 3.073817 | 2.197889 |
| prmB | 0.805765  | 3.750152 | 2.666442 |
| agal | 0.494403  | 2.299219 | 1.57103  |
| yhaJ | 0.31728   | 1.342749 | 0.883576 |
| yibK | 0.102661  | 0.493779 | 0.304719 |
| allD | 0.098417  | 0.33709  | 0.229512 |
| yigZ | 0.401229  | 1.486336 | 0.934784 |
| yajL | 0.445375  | 1.726971 | 1.508724 |
| ygiH | 0.161767  | 0.695694 | 0.636518 |
| wcaL | 0.455922  | 1.491828 | 1.312459 |
| acnB | 0.722431  | 2.606234 | 2.157461 |
| yifK | 0.571384  | 1.752373 | 1.678942 |
| ydeJ | 0.108756  | 0.288097 | 0.287529 |
| fepA | 1.282975  | 7.035098 | 6.937397 |
| phnN | 0.420336  | 2.027124 | 1.969437 |
| ydeS | 0.540567  | 2.006418 | 2.017886 |
| ais  | 0.021539  | 1.844471 | 1.658051 |
| napH | -0.039919 | 2.405163 | 2.08348  |
| yadI | 0.064119  | 1.73709  | 1.647241 |
| yhcF | 0.151589  | 3.254048 | 2.899677 |
| ybaO | 0.203313  | 3.367416 | 2.896923 |
| yifL | 0.209049  | 2.844707 | 2.487817 |
| frmA | 0.117339  | 1.373317 | 1.226183 |
| chpB | 0.04798   | 1.396683 | 1.157936 |
| hisM | 0.094799  | 3.54419  | 2.922729 |
| yehZ | 0.262798  | 2.10618  | 1.967675 |
| proB | 0.220119  | 2.066779 | 1.887647 |
| btuC | 0.348093  | 2.253749 | 1.878602 |
| aroB | 0.87176   | 4.799233 | 4.06809  |
| udk  | 0.210899  | 1.228054 | 1.028302 |
| yfdI | 0.38331   | 2.529241 | 2.208524 |
| add  | 0.073074  | 0.477865 | 0.40939  |
| sgbH | 0.16838   | 1.20218  | 1.021705 |
| malZ | 0.099921  | 0.528028 | 0.475787 |
| pyrF | 0.347215  | 2.281323 | 2.079772 |
| yhaM | 0.084187  | 0.51937  | 0.480849 |
| gspG | 0.121299  | 1.055383 | 0.853169 |
| yigG | 0.175891  | 1.825514 | 1.496007 |
| ppdA | 0.151088  | 1.57471  | 1.274534 |
| ygdL | 0.310569  | 2.072278 | 1.52872  |

|      |          |          |          |
|------|----------|----------|----------|
| ycfP | 0.237738 | 1.517371 | 1.208971 |
| ytfN | 0.251387 | 1.516961 | 1.188198 |
| uspG | 0.112181 | 0.561868 | 0.441953 |
| trxB | 0.431128 | 1.378443 | 1.567101 |
| yacF | 1.236331 | 4.181184 | 5.014564 |
| sdhC | 0.374848 | 1.400089 | 1.631102 |
| ppiD | 0.55884  | 2.724646 | 3.096172 |
| trkH | 0.28641  | 1.240111 | 1.461992 |
| ymjC | 0.102728 | 0.418787 | 0.470338 |
| yjdB | 0.493434 | 2.904087 | 3.205506 |
| yhfK | 0.205724 | 1.819317 | 1.954691 |
| fruB | 0.265809 | 1.930362 | 2.060703 |
| hflC | 0.706088 | 3.791321 | 4.63921  |
| hypA | 0.093967 | 0.555316 | 0.648081 |
| yjbE | 0.388343 | 2.646576 | 3.121634 |
| prpB | 0.425766 | 2.910778 | 3.370793 |
| yeiS | 0.405786 | 2.352983 | 3.037373 |
| yegZ | 0.106869 | 0.756743 | 0.952565 |
| yfgB | 0.327753 | 1.561612 | 2.042479 |
| yfeN | 0.361923 | 1.836862 | 2.412109 |
| malE | 0.612929 | 2.840252 | 3.862033 |
| proC | 0.202308 | 1.016964 | 1.378007 |
| ugpQ | 0.209381 | 1.243838 | 1.767921 |
| ycdT | 0.367637 | 2.576987 | 3.479011 |
| yfbW | 0.419623 | 3.106611 | 4.192153 |
| ydiJ | 0.358596 | 2.710442 | 3.696389 |
| moaB | 0.300304 | 2.263625 | 3.302604 |
| asr  | 0.154699 | 0.972425 | 1.474205 |
| pyrI | 0.239245 | 1.434829 | 2.165309 |
| cchB | 0.397008 | 2.70263  | 4.428009 |
| nudF | 0.386774 | 2.063883 | 3.281906 |
| panE | 0.321416 | 1.804237 | 2.854154 |
| yfeT | 0.241189 | 1.16121  | 1.853568 |
| yqhD | 0.157059 | 2.481328 | 3.484282 |
| ydbD | 0.049052 | 1.018039 | 1.500182 |
| hslR | 0.137449 | 1.399427 | 2.093419 |
| intR | 0.110132 | 1.383735 | 2.00889  |
| hisL | 0.388536 | 1.002891 | 1.284178 |
| recQ | 0.828987 | 2.531105 | 3.262241 |
| malG | 0.629095 | 1.760782 | 2.299536 |
| yheO | 0.744674 | 1.824044 | 2.512395 |
| yfcG | 0.06782  | 0.156895 | 0.223878 |
| wcaI | 0.527993 | 1.122254 | 1.576256 |
| ybhQ | 0.334842 | 0.857212 | 1.256239 |
| ybdN | 0.384201 | 0.97182  | 1.511427 |
| apaG | 0.767287 | 2.216795 | 3.336396 |
| yggT | 0.546832 | 1.605232 | 2.395143 |
| dcuA | 0.526782 | 1.736639 | 2.446334 |
| ydeW | 0.240047 | 0.762813 | 1.100964 |
| motB | 0.366145 | 1.072906 | 1.523915 |
| yafX | 1.010114 | 2.896573 | 4.000545 |
| yfaU | 0.198172 | 0.549792 | 0.900439 |
| aas  | 0.712071 | 2.219791 | 3.487089 |
| ptr  | 0.384129 | 0.438099 | 0.55465  |
| yegJ | 0.839137 | 0.832065 | 1.167379 |
| rffM | 0.782837 | 0.802242 | 1.064649 |
| ykgF | 1.092622 | 1.183588 | 1.292051 |
| gntR | 1.951176 | 2.171562 | 2.316497 |
| yagN | 1.384759 | 1.405266 | 1.717539 |
| mtlR | 0.900057 | 0.955136 | 1.148015 |
| glpB | 1.330223 | 1.958239 | 1.808101 |

|      |          |          |          |
|------|----------|----------|----------|
| ybhB | 1.360076 | 2.011289 | 1.986431 |
| ygiE | 0.482201 | 0.731223 | 0.726739 |
| ulaA | 0.985213 | 1.247897 | 1.331942 |
| glpA | 0.886183 | 1.121456 | 1.142249 |
| ykfF | 2.015258 | 2.81734  | 3.16658  |
| dgoT | 1.627519 | 2.508898 | 2.67723  |
| mdtB | 0.761797 | 1.170006 | 1.226678 |
| agaD | 0.820881 | 1.30136  | 1.358783 |
| gspH | 1.201234 | 1.890104 | 2.054146 |
| yheU | 1.856611 | 2.901703 | 3.319512 |
| hemX | 0.437311 | 0.703453 | 0.803562 |
| rpml | 0.599601 | 1.510823 | 1.634845 |
| hemN | 1.243144 | 2.803836 | 3.060347 |
| ysgA | 0.6688   | 1.839017 | 2.080587 |
| yiiR | 0.299048 | 0.791416 | 0.895321 |
| sdhD | 1.078069 | 3.019802 | 3.345257 |
| ygjK | 0.819844 | 1.638438 | 1.970775 |
| yhaK | 0.344156 | 0.750574 | 0.861854 |
| bioH | 0.919386 | 1.971169 | 2.284679 |
| wcaC | 0.604763 | 1.27888  | 1.485799 |
| yagU | 0.971381 | 2.323649 | 2.79159  |
| wcaB | 0.255994 | 0.600603 | 0.704765 |
| cbrA | 0.293733 | 0.650807 | 0.82187  |
| yahE | 0.736671 | 1.587499 | 1.953012 |
| aceB | 0.800518 | 1.741521 | 1.583379 |
| pioO | 1.109338 | 2.571097 | 2.239602 |
| hslO | 0.590743 | 1.404763 | 1.242309 |
| ppiB | 1.414652 | 3.070478 | 3.261011 |
| yajQ | 0.388566 | 0.797871 | 0.838005 |
| rffH | 0.295007 | 0.617185 | 0.639231 |
| mdtJ | 0.253986 | 0.5054   | 0.556261 |
| glgP | 0.632606 | 1.290576 | 1.406222 |
| potG | 0.41179  | 0.826821 | 0.828035 |
| yeiT | 0.236453 | 0.467621 | 0.458956 |
| fkpA | 0.419577 | 0.777278 | 0.775536 |
| gltJ | 1.34613  | 1.352846 | 3.129574 |
| appC | 1.407051 | 1.445318 | 3.008283 |
| cbrC | 1.293398 | 1.308129 | 2.732506 |
| cobS | 0.654937 | 0.612626 | 1.387382 |
| yagM | 1.391414 | 1.87484  | 3.249404 |
| yfdG | 1.229424 | 1.60213  | 2.971083 |
| ybdG | 0.919509 | 1.20541  | 2.270611 |
| yeeN | 0.306633 | 0.346796 | 0.670117 |
| ygiZ | 2.148125 | 2.686716 | 5.378219 |
| rarD | 0.75265  | 0.993301 | 1.98201  |
| ydaU | 0.778418 | 0.899094 | 1.856412 |
| yibD | 1.051339 | 1.55228  | 3.047195 |
| nuoM | 0.555445 | 0.792489 | 1.471346 |
| hisD | 0.905461 | 1.278988 | 2.439627 |
| yieL | 1.406317 | 1.898645 | 2.683701 |
| malT | 0.870478 | 1.077318 | 1.54244  |
| yieK | 1.346855 | 1.680811 | 2.264985 |
| wcaA | 0.237173 | 0.287522 | 0.37643  |
| ykfJ | 1.0379   | 1.116993 | 1.731279 |
| rsxD | 0.889933 | 0.939961 | 1.404975 |
| yhjH | 0.40965  | 0.436251 | 0.650806 |
| yagK | 2.174194 | 2.693151 | 4.18183  |
| djlB | 0.273407 | 0.325144 | 0.527039 |
| mtlA | 0.282049 | 0.357624 | 0.566706 |
| yfjI | 0.564006 | 0.732051 | 1.147103 |
| fruA | 0.615581 | 0.803523 | 1.257675 |

|      |          |          |          |
|------|----------|----------|----------|
| sbmC | 0.611654 | 1.043002 | 1.418356 |
| tdcR | 0.55368  | 1.028798 | 1.411958 |
| folX | 0.214234 | 0.396708 | 0.501407 |
| atoD | 0.684225 | 1.142806 | 1.888443 |
| yieP | 1.273389 | 2.222738 | 3.80698  |
| soxR | 0.454109 | 0.686602 | 1.11549  |
| malK | 0.280716 | 0.443844 | 0.670897 |
| yhjY | 0.790432 | 1.126843 | 1.758177 |
| ydiR | 0.514168 | 0.864898 | 1.318524 |
| eco  | 0.554041 | 0.975963 | 1.499815 |
| phnI | 2.03668  | 1.740685 | 4.819794 |
| dinD | 1.237549 | 0.907175 | 2.735038 |
| yqiH | 0.999253 | 0.683242 | 2.306665 |
| phnO | 1.29933  | 0.747749 | 2.066297 |
| yecA | 0.35136  | 0.239126 | 0.563106 |
| ydfB | 1.710802 | 0.927658 | 2.923544 |
| smtA | 0.383626 | 0.209104 | 0.689039 |
| pldB | 0.501635 | 0.319409 | 0.882897 |
| dppF | 1.984023 | 1.346913 | 3.802309 |
| yfcM | 0.736593 | 0.522493 | 1.459107 |
| yfjK | 0.801553 | 0.603231 | 1.592532 |
| ycjO | 0.498064 | 0.380142 | 0.972449 |
| yjfP | 0.514854 | 0.393423 | 0.954643 |
| phnJ | 0.579503 | 0.438334 | 1.041838 |
| yfjF | 1.451159 | 1.054514 | 1.695693 |
| ycjZ | 0.588238 | 0.40351  | 0.675953 |
| ycjW | 0.731506 | 0.501445 | 0.942974 |
| ytfH | 1.390161 | 0.963304 | 1.831268 |
| glpX | 1.302593 | 1.015253 | 1.681549 |
| hyfG | 1.355289 | 1.003402 | 1.754074 |
| hycA | 1.008712 | 0.768186 | 1.336048 |
| yiaN | 1.81101  | 1.009291 | 1.803174 |
| narG | 0.578146 | 0.340908 | 0.627323 |
| yfbU | 0.792444 | 0.45391  | 1.039194 |
| metB | 0.969989 | 0.58898  | 1.234263 |
| cspl | 0.193323 | 0.122693 | 0.255476 |
| recN | 0.79753  | 0.402552 | 1.073082 |
| ulaR | 0.716042 | 0.344385 | 0.927148 |
| yghD | 0.485418 | 0.216134 | 0.650323 |
| zntR | 1.554153 | 1.220198 | 2.523706 |
| ydeR | 1.260572 | 0.99469  | 2.029263 |
| aaeB | 1.243286 | 0.938864 | 2.031311 |
| ilvD | 1.227666 | 1.024294 | 2.082802 |
| yqjF | 0.252213 | 0.20485  | 0.431835 |
| glvC | 0.615804 | 0.521643 | 1.136224 |
| yagT | 2.468288 | 2.189573 | 4.407403 |
| nuoC | 0.46427  | 0.41151  | 0.746868 |
| gltP | 0.723868 | 0.682549 | 1.180581 |
| adiC | 1.160213 | 0.952521 | 1.724925 |
| ynhG | 0.24219  | 0.197023 | 0.352616 |
| yicE | 1.02579  | 0.796633 | 1.457981 |
| mmuP | 4.100179 | 3.618691 | 5.711577 |
| glpR | 0.949751 | 0.669422 | 0.765832 |
| rsxC | 1.769055 | 1.102903 | 1.498884 |
| galF | 0.708436 | 0.463989 | 0.635139 |
| yraO | 0.544742 | 0.514565 | 0.538895 |
| yibQ | 1.604825 | 1.366035 | 1.54624  |
| speG | 0.522194 | 0.41912  | 0.46561  |
| yhaO | 1.695556 | 1.248483 | 1.651859 |
| yjbJ | 1.120482 | 0.84756  | 1.075925 |
| yecE | 1.43503  | 1.140011 | 1.450963 |

|      |          |          |           |
|------|----------|----------|-----------|
| ycbR | 0.421026 | 0.329757 | 0.424909  |
| ybfH | 1.037931 | 0.859536 | 1.066609  |
| atpl | 1.255104 | 0.942176 | 1.32448   |
| yagA | 5.30651  | 3.944536 | 5.547174  |
| yfcC | 1.107613 | 1.016079 | 1.351241  |
| pflA | 1.643801 | 1.446813 | 1.90188   |
| ygeI | 1.141517 | 0.963278 | 1.272986  |
| yjbM | 0.91808  | 0.741948 | 1.045315  |
| gadE | 1.024057 | 4.069546 | 0.420057  |
| yidQ | 1.583354 | 7.80625  | 0.739508  |
| lysC | 0.260103 | 1.261636 | 0.146481  |
| bacA | 0.585556 | 2.697597 | 0.499475  |
| fliS | 0.267832 | 2.072914 | 0.253281  |
| tatA | 0.281196 | 1.13046  | 0.00735   |
| dgkA | 1.278223 | 5.835644 | -0.061081 |
| purE | 0.639753 | 2.33964  | 0.146394  |
| rlmB | 1.033445 | 3.917263 | 0.162239  |
| rhaS | 0.302765 | 0.814959 | 0.026038  |
| aspA | 0.768043 | 2.211512 | 0.122953  |
| tfaS | 0.501992 | 1.473899 | 0.126524  |
| yfaT | 0.279939 | 0.878387 | 0.116501  |
| nuoG | 0.711523 | 1.983144 | -0.651689 |
| yqjI | 0.33832  | 0.783334 | -0.256767 |
| ygfY | 0.485651 | 0.94204  | -0.213959 |
| pstB | 1.404614 | 2.771277 | -0.537717 |
| yaaU | 0.799731 | 1.905225 | -0.312717 |
| ydaN | 0.811935 | 1.767994 | -0.378726 |
| pykA | 0.968182 | 2.276614 | -0.519964 |
| rbfA | 1.623087 | 4.473698 | -0.916614 |
| yjgM | 0.726368 | 2.249436 | -0.410405 |
| intD | 0.526521 | 1.343755 | -0.099204 |
| hycE | 0.045982 | 0.114703 | -0.0035   |
| bipA | 0.391315 | 1.776638 | -0.164111 |
| ybgC | 0.328528 | 1.362065 | -0.076865 |
| sucB | 0.506769 | 1.821485 | -0.284972 |
| yehK | 0.372484 | 1.192994 | -0.164664 |
| yjfZ | 0.865726 | 2.88953  | -0.243902 |
| ydhX | 0.470104 | 1.51556  | -0.124388 |
| pntB | 0.985966 | 0.796805 | -0.046968 |
| envC | 2.236974 | 1.642475 | -0.038781 |
| fliM | 0.860016 | 0.625626 | -0.095222 |
| serB | 0.743389 | 0.702794 | -0.027757 |
| rluD | 0.744713 | 0.734187 | -0.101058 |
| cyaA | 2.417425 | 2.151909 | -0.379422 |
| pps  | 0.596244 | 0.532337 | -0.065572 |
| uup  | 1.162781 | 1.032075 | -0.2489   |
| yheN | 2.504005 | 2.124133 | 0.090061  |
| yheM | 1.861882 | 1.502522 | 0.122587  |
| cyaY | 2.377308 | 2.183061 | 0.282098  |
| rplU | 2.035378 | 1.484017 | 0.410006  |
| yagX | 1.242836 | 1.015425 | 0.307978  |
| napD | 0.941546 | 1.718369 | -0.207872 |
| hda  | 0.623815 | 1.126732 | -0.097473 |
| fimG | 1.116463 | 1.924256 | -0.166904 |
| yebB | 0.6042   | 0.874752 | -0.135414 |
| gntX | 1.401784 | 2.14549  | -0.447246 |
| ydcR | 0.303402 | 0.449096 | -0.140884 |
| yehC | 0.716218 | 1.188868 | -0.32391  |
| crr  | 7.079117 | 7.545772 | -2.95366  |
| yoaD | 0.750334 | 0.893023 | -0.311087 |
| cyoB | 0.691559 | 0.89676  | -0.328821 |



|      |          |          |           |
|------|----------|----------|-----------|
| ygaM | 1.075163 | 1.458965 | -0.579902 |
| pabA | 0.914505 | 1.118448 | -0.169454 |
| phnK | 0.849814 | 0.980102 | -0.249169 |
| oxyR | 0.757095 | 0.801979 | -0.506263 |
| ygaH | 0.646048 | 0.761781 | -0.532034 |
| ydfG | 0.55965  | 0.715637 | -0.445079 |
| zapA | 1.257021 | 1.536228 | -0.808697 |
| wza  | 0.232505 | 0.325329 | -0.1605   |
| bglB | 0.787727 | 1.28282  | -0.737736 |
| yjdL | 0.30522  | 0.468276 | -0.242483 |
| yehU | 0.899359 | 1.489479 | -0.765408 |
| rcaA | 0.182491 | 0.367631 | -0.143085 |
| ybgO | 0.44324  | 0.785918 | -0.354821 |
| ygdQ | 0.640533 | 0.395671 | 0.320107  |
| ddpD | 2.001742 | 1.333875 | 0.842002  |
| atoA | 0.931165 | 0.614282 | 0.40895   |
| yqcD | 0.774883 | 0.431848 | 0.316113  |
| yfcF | 1.784791 | 1.032346 | 0.606293  |
| yzcX | 0.830384 | 0.457354 | 0.202953  |
| ydcY | 1.283221 | 0.669027 | 0.349565  |
| frvB | 1.714577 | 1.087076 | 0.465714  |
| yhbC | 1.803067 | 1.478469 | 0.776725  |
| fdx  | 1.098504 | 1.058183 | 0.658536  |
| yjbD | 0.849967 | 0.910358 | 0.457517  |
| kefB | 1.72924  | 1.361372 | 0.935521  |
| flil | 1.311972 | 1.113146 | 0.837085  |
| yzgL | 1.272804 | 0.957579 | 0.892747  |
| yfgD | 0.890489 | 0.73536  | 0.648428  |
| iscA | 0.727858 | 0.558735 | 0.457755  |
| ykfC | 1.54256  | 1.151403 | 1.00267   |
| aer  | 1.218858 | 0.750099 | 0.751544  |
| fadA | 0.477333 | 0.299104 | 0.288691  |
| talB | 0.844652 | 0.247688 | 0.485061  |
| ygjJ | 0.263102 | 0.061267 | 0.162569  |
| epd  | 1.667936 | 0.804794 | 1.096107  |
| hdeA | 1.076146 | 0.518132 | 0.628702  |
| torS | 1.999542 | 0.879984 | 1.053394  |
| yfcZ | 0.684908 | 0.305837 | 0.382474  |
| yjbB | 1.339559 | 0.544615 | 0.737119  |
| yagG | 4.891785 | 1.809363 | 2.609415  |
| visC | 1.987095 | 0.820852 | 0.798351  |
| modF | 1.299685 | 0.528471 | 0.579078  |
| afuC | 3.406437 | 1.494345 | 1.498834  |
| lar  | 1.216419 | 0.335068 | 0.492132  |
| ppdD | 0.607124 | 0.207063 | 0.251215  |
| yidH | 1.511505 | 0.316796 | 0.056174  |
| ftsX | 1.578413 | 0.368076 | 0.185485  |
| nanT | 0.56066  | 0.133602 | 0.048067  |
| cyoA | 0.662405 | 0.189633 | 0.137889  |
| ymcE | 0.88302  | 0.272895 | 0.17347   |
| frc  | 1.178235 | 0.261658 | 0.237401  |
| yghW | 0.730342 | 0.09366  | 0.163852  |
| betA | 1.396374 | 0.179479 | 0.25387   |
| fur  | 2.250942 | 0.8735   | -0.087066 |
| yegV | 1.157981 | 0.417749 | -0.139459 |
| cyoD | 1.642765 | 0.38304  | -0.195004 |
| uvrA | 1.451469 | 0.353061 | -0.169232 |
| surE | 1.682505 | 0.800222 | 0.077828  |
| aslB | 0.649982 | 0.33917  | 0.041987  |
| xylH | 2.422661 | 1.22722  | 0.167643  |
| yiaL | 0.664021 | 0.38175  | 0.092341  |

|      |           |           |          |
|------|-----------|-----------|----------|
| norV | 0.669963  | 0.277004  | 0.092712 |
| yagZ | 1.237677  | 0.441054  | 0.094101 |
| yccA | 1.347089  | 0.441535  | 0.062585 |
| yagl | 2.537354  | 0.878122  | 0.094043 |
| cutA | 2.057979  | 0.065107  | 0.988583 |
| ccmC | 1.075375  | 0.078275  | 0.420338 |
| ycjP | 1.198779  | 0.215835  | 0.531572 |
| yagF | 3.164822  | 0.492304  | 1.118748 |
| yjfJ | 1.052013  | -0.004611 | 0.298145 |
| uxaC | 0.945605  | -0.033995 | 0.307513 |
| fxsA | 0.959482  | -0.019203 | 0.356407 |
| yaiO | 1.707453  | -0.137432 | 0.673876 |
| thiF | 1.112975  | -0.165456 | 0.457556 |
| frlD | 1.148826  | 0.234151  | 0.89085  |
| argE | 0.830479  | 0.199643  | 0.746904 |
| rhaB | 1.151966  | 0.229241  | 1.020133 |
| yjjN | 1.416609  | 0.308586  | 1.213073 |
| yliB | 1.271846  | 0.255371  | 1.212006 |
| zntA | 1.986079  | 0.849435  | 1.810939 |
| mdoD | 1.209514  | 0.560026  | 1.223286 |
| minE | 1.856064  | 0.855151  | 1.85316  |
| yebG | 0.308587  | 0.120106  | 0.265871 |
| norR | 0.994141  | 0.340156  | 0.845282 |
| ybhR | 2.140836  | 0.948361  | 1.60864  |
| ygeK | 0.904566  | 0.463788  | 0.741255 |
| fcl  | 0.822579  | 0.236915  | 1.004331 |
| wcaD | 0.426555  | 0.093861  | 0.51605  |
| yahO | 1.571031  | 0.389128  | 1.875253 |
| ygcB | 0.708456  | 0.14614   | 0.915691 |
| minC | 1.34538   | 0.278949  | 1.761704 |
| yfcE | 0.205159  | 0.060466  | 0.230402 |
| ybcL | 0.501635  | 0.147947  | 0.557342 |
| crcB | 0.793756  | 0.286129  | 0.991263 |
| frvX | 1.04855   | 0.364888  | 1.325881 |
| aroM | 0.359105  | 0.070652  | 0.519256 |
| yfiF | 0.758847  | 0.163748  | 1.207594 |
| glcF | 0.732706  | 0.017431  | 0.725615 |
| hyfJ | 0.241256  | 0.01215   | 0.237499 |
| yhjB | 0.211698  | 0.029408  | 0.232136 |
| ahpF | 0.641818  | 0.036195  | 0.742985 |
| gntK | 1.461817  | 0.056839  | 1.685786 |
| ydaG | 0.386914  | -0.023389 | 0.372532 |
| ypdB | 1.022635  | -0.04316  | 0.948923 |
| frmR | 1.006764  | -0.063645 | 1.020676 |
| potF | 0.877803  | -0.100955 | 0.800427 |
| mntR | 0.833422  | -0.113009 | 0.852647 |
| uhpC | 1.542265  | -0.183045 | 1.530019 |
| yfjL | 0.937802  | -0.082088 | 0.722422 |
| fucl | 0.180761  | 1.492632  | 2.736877 |
| cadC | 0.203488  | 2.523558  | 4.833297 |
| yoeE | 0.036812  | 0.518548  | 0.980677 |
| ilvL | 0.052798  | 0.671629  | 1.334829 |
| ydcX | 0.031896  | 1.681833  | 3.147008 |
| selB | 0.069928  | 2.201327  | 4.058091 |
| yhhK | 0.038449  | 2.466057  | 4.431863 |
| nfrA | 0.029023  | 1.124763  | 2.017961 |
| ytfQ | -0.004201 | 0.795769  | 1.466599 |
| yhcG | 0.2158    | 2.449885  | 4.28947  |
| yjgX | 0.085099  | 1.42655   | 2.516099 |
| yigF | 0.171076  | 2.338938  | 3.944825 |
| yraJ | -0.069639 | 1.293196  | 2.615814 |

|      |           |          |           |
|------|-----------|----------|-----------|
| yeaR | -0.090134 | 1.987635 | 3.748025  |
| yafK | 0.033699  | 2.671293 | 5.428546  |
| fldB | -0.108072 | 1.388591 | 2.104022  |
| paaD | -0.069247 | 0.646858 | 1.019294  |
| mgo  | -0.013913 | 1.515183 | 2.367889  |
| napC | 0.008895  | 2.034944 | 2.864749  |
| ygaD | -0.066633 | 2.190522 | 3.215781  |
| yhcH | -0.347675 | 2.61067  | 4.517397  |
| cusC | -0.86699  | 6.544938 | 11.496245 |
| yadK | -0.147442 | 1.248722 | 2.228936  |
| ypaA | -0.272772 | 2.298907 | 3.829887  |
| shiA | -0.03907  | 0.37344  | 0.618345  |
| dcp  | -0.060977 | 0.670152 | 1.153086  |
| yccX | -0.06705  | 0.918017 | 1.566977  |
| ydeQ | -0.041716 | 0.781249 | 1.326474  |
| yhdH | -0.067666 | 1.504529 | 2.574514  |
| yejF | -0.133549 | 1.066332 | 2.002882  |
| ysaB | -0.469185 | 2.134535 | 3.779853  |
| flgB | -0.204694 | 0.888742 | 1.649298  |
| glpC | -0.318146 | 1.558359 | 2.613065  |
| ymfC | -0.395968 | 0.600463 | 1.415884  |
| ynfM | -0.493718 | 0.826835 | 1.883485  |
| yeeF | -0.413593 | 0.738898 | 1.682174  |
| yfaA | -0.609817 | 1.32211  | 2.997002  |
| narV | -0.458391 | 0.951835 | 2.214784  |
| mrp  | -0.167575 | 0.32575  | 0.735306  |
| ydeK | -0.676845 | 1.159901 | 2.912239  |
| pitA | -1.764343 | 2.918725 | 7.610098  |
| yahC | -0.814637 | 1.744731 | 4.554435  |
| sppA | -0.332872 | 0.654689 | 1.663531  |
| tus  | -0.282696 | 0.762888 | 1.65447   |
| yfaL | -0.730889 | 1.730079 | 3.402282  |
| ybeL | -0.211772 | 0.572513 | 1.157976  |
| moeB | -0.646517 | 1.750302 | 3.562759  |
| chiA | -0.694819 | 1.908279 | 3.746563  |
| pfs  | -0.207284 | 1.001257 | 1.951963  |
| ycjG | -0.164807 | 0.957937 | 2.040313  |
| kefF | -0.413063 | 2.057051 | 4.229109  |
| atoS | -0.233886 | 1.243117 | 2.501616  |
| yoal | -0.347302 | 1.594949 | 3.376424  |
| wzc  | -0.290793 | 1.212902 | 2.536016  |
| manX | -0.397896 | 1.488085 | 3.081293  |
| arnT | -0.265718 | 1.748786 | 3.941641  |
| tap  | -0.204551 | 1.213811 | 2.824294  |
| nlpC | -0.082971 | 0.570759 | 1.369558  |
| ydfR | -0.037191 | 0.470523 | 1.013847  |
| yfbO | -0.142356 | 1.44748  | 3.211211  |
| ybgA | -0.124216 | 1.25081  | 2.714015  |
| cysG | -0.072604 | 0.615598 | 1.285681  |
| hybO | -0.213773 | 1.501586 | 3.873931  |
| yehX | -0.06661  | 1.451472 | 3.414741  |
| yohC | -0.009838 | 0.170507 | 0.424508  |
| napF | -0.227973 | 0.40871  | 1.199182  |
| fliH | -0.268324 | 0.469947 | 1.307179  |
| aceA | -0.412041 | 0.781044 | 2.421924  |
| ymgD | -0.19699  | 0.404447 | 1.208467  |
| lipB | -0.219467 | 0.563788 | 1.594316  |
| ycbV | -0.340196 | 0.804051 | 2.160293  |
| garL | -0.331207 | 1.320409 | 3.13266   |
| yjcD | -0.156841 | 0.632332 | 1.652452  |
| ycbZ | -0.270677 | 1.00691  | 2.680722  |

|      |           |          |          |
|------|-----------|----------|----------|
| gloA | -0.339398 | 0.81751  | 2.560757 |
| selD | -0.268067 | 0.772075 | 2.545488 |
| cynS | -0.541519 | 1.803187 | 5.280077 |
| yrdA | -0.200682 | 0.704885 | 2.119848 |
| mdtK | -0.178202 | 0.654515 | 1.912545 |
| ybaJ | -0.084565 | 0.269374 | 0.833515 |
| ymdC | -0.165797 | 0.495662 | 1.503187 |
| nudG | -0.119388 | 0.818763 | 2.509358 |
| aslA | -0.216358 | 0.921265 | 2.921114 |
| flk  | -0.192449 | 0.884195 | 2.617304 |
| fixC | 0.578397  | 1.222508 | 2.537549 |
| yqhG | 0.919603  | 2.009872 | 4.097248 |
| nuoH | 0.309269  | 0.683661 | 1.423398 |
| ygbJ | 0.792746  | 1.443141 | 3.203146 |
| ivbL | 0.703419  | 1.11175  | 2.431788 |
| yfjN | 0.645835  | 0.980982 | 2.247945 |
| rsxA | 1.040425  | 1.699709 | 3.809174 |
| dcuD | 1.159956  | 1.732035 | 3.764605 |
| ybhO | 0.830701  | 1.235551 | 2.593978 |
| guaC | 0.941785  | 2.457419 | 4.376171 |
| yhjG | 0.66303   | 1.651105 | 3.082796 |
| rfaK | 1.047265  | 2.146918 | 3.640795 |
| yheT | 0.728532  | 1.655711 | 2.963611 |
| sthA | 0.976529  | 2.304115 | 4.081185 |
| truB | 0.677243  | 1.541376 | 2.653479 |
| ygcO | 0.699516  | 1.594924 | 2.778176 |
| adiY | 0.424861  | 0.948343 | 1.606805 |
| ybbY | 0.324294  | 0.608765 | 1.159094 |
| fhiA | 0.749666  | 1.3671   | 2.611429 |
| ylcE | 0.179495  | 0.373043 | 0.695338 |
| yael | 1.15719   | 2.338143 | 4.60944  |
| yncJ | 0.578758  | 1.117546 | 2.161717 |
| clcA | 0.351142  | 0.706184 | 1.35728  |
| ygfX | 0.51303   | 1.812087 | 3.639447 |
| yafT | 0.382755  | 1.250717 | 2.530667 |
| yqiB | 0.354993  | 1.172297 | 2.326693 |
| yhdV | 0.666502  | 2.340004 | 4.835246 |
| yiiM | 0.088723  | 0.254392 | 0.543812 |
| speD | 0.188674  | 0.553649 | 1.180522 |
| yggR | 0.321072  | 1.878697 | 3.425746 |
| idnT | 0.197113  | 1.079695 | 1.875684 |
| ybhl | 0.483587  | 1.83926  | 3.50557  |
| gltL | 0.274026  | 1.154963 | 2.237089 |
| exbB | 0.547437  | 2.512362 | 4.692925 |
| hsdR | 0.134354  | 0.604907 | 1.113477 |
| yeaN | 0.059424  | 0.353429 | 0.695587 |
| yeeE | 0.195006  | 1.187835 | 2.347329 |
| yrfD | 0.363955  | 1.902996 | 3.64514  |
| yeeU | 0.299944  | 1.360572 | 2.786319 |
| eutJ | 0.664397  | 2.291429 | 4.006127 |
| fdrA | 0.516471  | 1.873882 | 3.280847 |
| selA | 0.947228  | 2.906361 | 5.277771 |
| ompL | 0.298181  | 0.909542 | 1.640195 |
| ego  | 0.203297  | 0.652343 | 1.182714 |
| mhpE | 0.134551  | 0.450906 | 0.831216 |
| htrG | 0.54485   | 2.068318 | 3.390293 |
| yicH | 0.416811  | 0.885635 | 2.169735 |
| caiD | 0.887697  | 1.804565 | 4.658886 |
| ssuE | 0.72595   | 1.716106 | 4.553851 |
| ybiN | 0.239195  | 0.61411  | 1.615673 |
| ypdI | 0.471983  | 1.456822 | 3.675793 |

|       |           |          |          |
|-------|-----------|----------|----------|
| yiaJ  | 0.337868  | 0.869486 | 2.102943 |
| galM  | 0.970608  | 2.463976 | 5.934846 |
| yjell | 0.273578  | 0.736866 | 1.79889  |
| yaiF  | 0.252693  | 0.69434  | 1.692799 |
| cusS  | 0.431696  | 1.256042 | 3.028756 |
| flgD  | 0.347722  | 0.695278 | 2.063571 |
| ydcC  | 0.38194   | 1.170934 | 3.718812 |
| yncN  | 0.140815  | 0.376518 | 1.214069 |
| mltB  | 0.298194  | 1.032226 | 3.064009 |
| yqjJ  | 0.245763  | 0.775151 | 2.243732 |
| yfjD  | 0.699273  | 1.680276 | 5.115117 |
| ynfF  | 0.395176  | 1.079534 | 3.159613 |
| gspE  | 0.409486  | 3.235461 | 6.817404 |
| agaS  | 0.174569  | 1.062599 | 2.192388 |
| mngB  | 0.137354  | 1.517366 | 3.305994 |
| sdaC  | 0.089036  | 1.782728 | 4.23334  |
| yhbY  | 0.49133   | 3.263746 | 7.910816 |
| rumA  | 0.180508  | 1.082147 | 2.702367 |
| yjgH  | 0.258393  | 2.548977 | 6.040961 |
| chbR  | 0.195878  | 1.493221 | 3.478411 |
| yejH  | 0.135893  | 0.980536 | 2.267882 |
| ybbK  | 0.308568  | 1.249886 | 3.213093 |
| ydgG  | 0.109033  | 0.560424 | 1.433272 |
| yncD  | 0.122194  | 0.574447 | 1.472942 |
| hyfH  | 0.293743  | 1.350255 | 3.563652 |
| glgB  | 0.115272  | 0.528622 | 1.405358 |
| yegS  | 0.173183  | 0.640921 | 1.514066 |
| aceK  | 0.250779  | 1.210148 | 2.801502 |
| yjbH  | 0.2018    | 0.982984 | 2.313999 |
| ybcD  | 0.324987  | 1.382092 | 3.198226 |
| ydjJ  | 0.187594  | 0.671396 | 1.48231  |
| ydiU  | 0.354681  | 1.524976 | 3.367113 |
| hisI  | 0.170015  | 1.479654 | 4.432462 |
| speA  | 0.074881  | 0.558916 | 1.685046 |
| yidE  | 0.250918  | 1.561581 | 4.465323 |
| yfcO  | 0.097602  | 0.720304 | 2.054028 |
| yfbH  | 0.214255  | 1.68127  | 4.75268  |
| ydhW  | 0.053505  | 1.649978 | 5.707432 |
| ymfP  | 0.198062  | 0.9538   | 3.107839 |
| ybgP  | 0.20289   | 1.640529 | 5.326358 |
| yeeP  | 0.10073   | 0.682782 | 2.256492 |
| yhbT  | 0.122127  | 1.285915 | 4.252438 |
| yhaV  | 0.037736  | 0.510212 | 1.624487 |
| cynT  | 0.140152  | 0.884528 | 3.086205 |
| fecR  | 0.152274  | 1.062175 | 3.745374 |
| moaD  | 0.536391  | 1.516798 | 5.298592 |
| metI  | 0.247253  | 0.744873 | 2.7019   |
| leuL  | 0.36183   | 1.343727 | 4.652038 |
| yaeR  | 0.191235  | 0.827181 | 3.091067 |
| yadS  | 0.019579  | 2.156483 | 6.498046 |
| moaE  | -0.204477 | 2.236589 | 7.197935 |
| yhdT  | -0.06122  | 1.319017 | 4.054876 |
| yeaK  | -0.045874 | 0.727937 | 2.282428 |
| ygdI  | -0.000795 | 0.74558  | 2.030142 |
| yjiA  | 1.308877  | 2.093597 | 5.866022 |
| pspA  | 0.510515  | 0.721109 | 2.076945 |
| ybfB  | 0.592401  | 0.801729 | 2.249746 |
| glvG  | 0.26887   | 0.335919 | 0.969912 |
| rbsD  | 0.38167   | 0.651315 | 1.683928 |
| ybfM  | 0.662047  | 1.067262 | 2.621216 |
| thiD  | 0.626955  | 0.929269 | 2.423396 |

|      |          |          |          |
|------|----------|----------|----------|
| mscL | 1.056517 | 1.57787  | 4.055966 |
| yfjJ | 1.280854 | 1.409416 | 3.428843 |
| lepA | 1.021791 | 1.127651 | 2.754932 |
| gntY | 1.352672 | 1.397662 | 3.368046 |
| ymfD | 1.062317 | 1.007379 | 2.9796   |
| truD | 0.747724 | 0.758551 | 2.071108 |
| hybA | 0.622883 | 0.667351 | 1.794556 |
| yhgE | 0.394129 | 0.44559  | 1.17371  |
| ycbJ | 1.526141 | 1.840128 | 5.041206 |
| ttdB | 0.256474 | 0.296799 | 0.822744 |
| ygfG | 0.868921 | 0.906179 | 2.781387 |
| yecO | 0.115331 | 0.125592 | 0.370819 |
| betI | 0.553178 | 0.574348 | 1.829987 |
| frvA | 0.917047 | 0.802932 | 2.725706 |
| fliZ | 0.616928 | 0.48166  | 1.808321 |
| malS | 0.861759 | 0.835788 | 2.914473 |
| fkIB | 1.162409 | 1.157001 | 4.188899 |
| wbbI | 0.400283 | 0.426364 | 1.518066 |
| yhcO | 0.405521 | 0.333523 | 1.342863 |
| yhbO | 1.316642 | 1.139586 | 4.638269 |
| sfmH | 0.678556 | 0.407337 | 1.899201 |
| ppdC | 0.929805 | 0.522659 | 2.514622 |
| mak  | 0.634921 | 0.445823 | 1.895348 |
| gcl  | 0.47029  | 0.328945 | 1.373145 |
| ybaX | 0.303415 | 0.439509 | 1.483735 |
| dppD | 0.592733 | 0.814472 | 3.002766 |
| fucK | 0.496476 | 0.838926 | 2.807932 |
| menE | 0.782781 | 1.238312 | 4.127591 |
| yfdP | 0.477339 | 0.838095 | 2.884195 |
| ygiV | 0.575696 | 0.911828 | 3.234824 |
| yfaH | 0.293218 | 0.481293 | 1.727381 |
| yjgR | 0.232712 | 0.396216 | 1.593247 |
| yfjX | 0.272388 | 0.53719  | 1.963466 |
| yibJ | 1.046072 | 1.86511  | 6.754905 |
| napG | 0.594536 | 0.682896 | 2.687642 |
| rzoD | 1.198266 | 1.475938 | 5.25596  |
| yjeB | 0.711973 | 0.795645 | 2.946801 |
| ygcM | 0.284391 | 0.30765  | 1.143641 |
| yidK | 0.898402 | 1.283988 | 3.931284 |
| sodC | 0.406509 | 0.576609 | 1.852567 |
| ompW | 0.736854 | 0.878894 | 2.96299  |
| hyfD | 1.287932 | 1.594168 | 5.090884 |
| ybaY | 0.645951 | 0.794345 | 3.45941  |
| aroH | 0.686976 | 0.744214 | 3.748682 |
| mutL | 1.550841 | 1.448747 | 6.654132 |
| yhfS | 0.671219 | 0.630885 | 2.944832 |
| yihM | 0.801274 | 0.843361 | 3.854293 |
| cybC | 0.380021 | 0.306598 | 1.42147  |
| lacA | 0.938047 | 0.680932 | 3.439278 |
| bioF | 0.799225 | 0.618427 | 3.166733 |
| brnQ | 1.683673 | 1.282504 | 6.543356 |
| yiiL | 0.632712 | 0.403091 | 2.151505 |
| ycbL | 0.341578 | 0.20606  | 1.131402 |
| glgX | 1.354542 | 0.937756 | 4.623798 |
| alx  | 0.800391 | 0.46371  | 2.789661 |
| yjdJ | 0.706545 | 0.611249 | 3.420196 |
| nudD | 0.383013 | 0.280743 | 1.717177 |
| hokC | 0.445995 | 0.340809 | 2.031892 |
| creC | 0.808682 | 0.52414  | 3.333579 |
| yihL | 1.083203 | 0.653411 | 4.588272 |
| sieB | 0.803982 | 0.451742 | 3.461985 |

|      |           |          |          |
|------|-----------|----------|----------|
| ygfQ | 0.712211  | 0.422507 | 3.271802 |
| sufA | 0.598736  | 0.177042 | 1.866877 |
| rnb  | 0.904364  | 0.352086 | 2.970106 |
| fixA | 0.712853  | 0.256361 | 2.331234 |
| envR | 0.618549  | 0.298516 | 2.166332 |
| ygeW | 0.700038  | 0.305722 | 2.527302 |
| grxC | 0.75181   | 0.377182 | 2.281938 |
| csgD | 0.469244  | 0.205942 | 1.44632  |
| ygaR | 0.384264  | 0.105319 | 1.589174 |
| fdhE | 0.924741  | 0.185207 | 3.483586 |
| alkB | 0.362643  | 0.12358  | 1.338996 |
| yjiS | 0.840945  | 0.342761 | 3.379731 |
| yijD | 0.682634  | 0.297672 | 3.497691 |
| hyfE | 0.538919  | 0.27115  | 2.599505 |
| kdpF | 0.44058   | 0.254217 | 2.304736 |
| ydjF | 0.601734  | 0.237664 | 2.679999 |
| rsmB | -0.10069  | 0.430602 | 2.019455 |
| nikB | -0.085901 | 0.327043 | 1.602127 |
| gpmA | -0.131486 | 0.636581 | 3.194396 |
| slyX | -0.090852 | 0.498395 | 2.490826 |
| ycbB | -0.086737 | 0.62631  | 3.361469 |
| ybeB | -0.056728 | 0.305292 | 1.667007 |
| yoaH | -0.077052 | 0.262828 | 1.459733 |
| hflX | -0.025991 | 0.31188  | 2.044477 |
| pinQ | -0.029571 | 0.289144 | 1.948085 |
| ygbI | -0.201491 | 0.309478 | 2.406471 |
| yjgL | -0.247115 | 0.563063 | 3.58306  |
| yfiB | 0.179319  | 0.647505 | 2.880504 |
| sbcC | 0.130854  | 0.375942 | 1.757642 |
| ybhK | 0.205522  | 1.050274 | 4.797082 |
| yfjV | 0.102849  | 0.49299  | 2.069061 |
| ybbP | 0.088435  | 0.702274 | 3.547395 |
| ycfJ | 0.154637  | 0.760194 | 4.366551 |
| rmf  | 0.229064  | 0.846261 | 4.907544 |
| yedX | 0.024793  | 0.47491  | 1.921518 |
| yaiE | 0.030209  | 0.610045 | 2.395683 |
| ydbL | 0.080282  | 0.810478 | 3.240715 |
| yjiA | 0.035114  | 0.589536 | 2.470943 |
| yecC | -0.023368 | 0.802687 | 3.159841 |
| yfhR | -0.009587 | 0.533558 | 2.165909 |
| yegU | 0.030391  | 0.6499   | 2.93585  |
| yjfl | 0.042279  | 0.735156 | 3.428758 |
| cof  | -0.001763 | 0.204395 | 0.888388 |
| ybhJ | -0.061609 | 0.596756 | 2.599203 |
| rhaT | -0.071799 | 0.556921 | 2.405833 |
| rimJ | 0.017724  | 0.460404 | 4.111418 |
| yeaC | 0.011801  | 0.257406 | 2.438944 |
| rrmA | 0.139871  | 0.34095  | 3.282619 |
| yhbS | 0.110256  | 0.319145 | 3.342557 |
| yggW | 0.15422   | 0.677441 | 4.589747 |
| ycbX | 0.079582  | 0.443228 | 3.23218  |
| ydjO | 0.098821  | 0.378086 | 2.890318 |
| ygfH | 0.163937  | 0.275177 | 1.25626  |
| atoE | 0.329687  | 0.685817 | 3.57202  |
| yiiD | 0.625481  | 1.111936 | 5.670056 |
| mdlA | 0.473145  | 0.928454 | 4.561322 |
| yeeX | 0.278226  | 0.544544 | 2.762262 |
| ycgH | 0.247542  | 0.363945 | 2.643753 |
| araC | 0.194471  | 0.293371 | 1.872893 |
| sbmA | 0.300383  | 0.609656 | 3.906716 |
| eptA | 0.096258  | 0.19003  | 1.202979 |

|      |           |           |           |
|------|-----------|-----------|-----------|
| yebY | 0.166686  | 0.302521  | 1.961084  |
| yfcA | 0.186029  | 0.400228  | 2.352822  |
| phnF | 0.448445  | 0.429693  | 3.113954  |
| yggH | 0.453007  | 0.473901  | 3.370762  |
| yceF | 0.353989  | 0.412339  | 3.696995  |
| hycH | 0.381741  | 0.488082  | 4.2077    |
| ybhL | 0.270118  | 0.395799  | 3.760346  |
| hflD | 0.554218  | 0.406537  | 5.028904  |
| yedQ | 0.166547  | 0.14997   | 1.534724  |
| renD | -0.399723 | 0.996122  | 17.023569 |
| ydhl | -0.10893  | 0.21706   | 4.488219  |
| yegD | -0.025406 | 0.122728  | 2.037355  |
| tyrB | -0.150602 | 0.371495  | 4.506477  |
| ydjY | -0.382533 | 0.321645  | 5.955607  |
| codB | -0.150926 | 0.092633  | 2.944373  |
| fnr  | -0.128608 | 0.012473  | 2.100571  |
| ynfK | -0.494323 | 0.25839   | 4.595627  |
| ybaE | -0.246256 | 0.185236  | 2.071121  |
| yjjG | -0.074098 | 0.080106  | 0.886952  |
| nrdI | -0.212697 | 0.252134  | 2.444291  |
| ynaK | -0.194518 | 0.047562  | 1.773009  |
| mviM | -0.475805 | 0.032875  | 4.384815  |
| hyaA | 0.140632  | 0.072311  | 1.610905  |
| uvrB | 0.220527  | 0.155509  | 2.50937   |
| glcB | 0.36748   | 0.03405   | 5.521705  |
| glcG | 0.182715  | 0.026426  | 2.637825  |
| yjbA | 0.310358  | 0.075338  | 3.272036  |
| chbF | 0.285331  | 0.092603  | 3.293083  |
| yghT | 0.14278   | 0.112588  | 2.609351  |
| yeaM | 0.01578   | 0.015379  | 0.299476  |
| narZ | 0.104919  | 0.106743  | 2.175027  |
| yqeF | 0.103279  | 0.252801  | 3.69017   |
| yfjP | 0.073257  | 0.13475   | 2.003481  |
| ada  | 0.04402   | 0.274816  | 4.699043  |
| ybaW | 0.049676  | 0.181868  | 3.355882  |
| yecD | 0.039258  | 0.068022  | 1.543961  |
| ynaE | 0.047023  | 0.018406  | 1.899246  |
| rihB | 0.088613  | 0.033298  | 3.139456  |
| yaiU | 0.078038  | 0.074921  | 3.194288  |
| trkG | 0.111003  | 0.166031  | 5.877758  |
| gsk  | 0.080419  | -0.031401 | 5.85222   |
| ldhA | -0.017917 | 0.039629  | 2.086059  |
| ybeH | -0.064221 | 0.000818  | 2.961867  |
| yfbP | -0.091325 | -0.070839 | 3.039877  |
| ynjE | -0.030474 | -0.044348 | 1.451367  |
| stfQ | 0.016483  | -0.090586 | 2.631581  |
| kdgR | -0.003751 | -0.038972 | 1.4133    |
| sfmF | 0.001892  | -0.029515 | 0.491578  |
| ynjD | 0.038618  | -0.140324 | 2.955004  |
| macB | 0.127761  | -0.11736  | 2.361654  |
| nrfD | 0.065468  | -0.023758 | 1.522855  |
| yphE | -0.089564 | -0.117694 | 1.550424  |
| emrY | -0.027819 | -0.142658 | 1.219191  |
| endA | -0.731178 | 0.581409  | 2.713814  |
| menF | -0.378568 | 0.302232  | 1.421186  |
| citC | -0.44708  | 0.352409  | 1.673949  |
| chbC | -0.768703 | 0.625793  | 3.055592  |
| ydhA | -0.63398  | 0.440558  | 2.475546  |
| ygjP | -0.208694 | 0.153045  | 0.800314  |
| citT | -0.371911 | 0.246611  | 1.350235  |
| pncA | -0.176612 | 0.115948  | 0.652118  |



|      |           |           |          |
|------|-----------|-----------|----------|
| hycC | -0.930454 | 0.64841   | 3.866929 |
| uidA | -0.134543 | 0.085042  | 0.525381 |
| paaG | -0.997758 | 0.656121  | 3.304989 |
| ypeC | -0.61658  | 0.391222  | 2.012132 |
| acrD | -0.914472 | 0.645277  | 3.064602 |
| yoaC | -0.172052 | 0.076679  | 0.723056 |
| hypF | -0.335635 | 0.158071  | 1.537398 |
| flgI | -0.175085 | 0.056706  | 0.690231 |
| pabB | -0.55688  | 0.197667  | 2.148826 |
| pmrD | -0.584491 | 0.318425  | 2.373539 |
| tdcF | -0.715588 | 0.184104  | 2.243314 |
| slt  | -0.427141 | 0.141008  | 1.346138 |
| yeaQ | -0.741419 | 0.273738  | 2.511328 |
| gmr  | -0.438719 | 0.172828  | 1.586513 |
| ydjQ | -0.357423 | 0.733768  | 3.195918 |
| pspD | -0.208269 | 0.476503  | 2.073018 |
| yaeF | -0.348568 | 0.890449  | 3.879214 |
| yqjE | -0.351141 | 0.504838  | 2.808224 |
| rspA | -0.221085 | 0.318985  | 1.579667 |
| bglG | -0.594283 | 0.811238  | 4.110314 |
| ypeA | -0.264402 | 0.308017  | 2.096107 |
| nirB | -0.796654 | 0.847755  | 5.108229 |
| ydeV | -0.514215 | 0.536829  | 2.195952 |
| yfjQ | -0.619717 | 0.821947  | 3.176095 |
| ydiA | -0.105836 | 0.139206  | 0.541385 |
| livK | -0.517314 | 0.777835  | 3.257033 |
| pheP | -0.353607 | 0.526545  | 2.127845 |
| yncl | -0.303307 | 0.49403   | 1.727062 |
| ybbM | -0.409168 | 0.76291   | 2.637228 |
| hyaB | -0.450526 | -0.002469 | 2.106969 |
| ycal | -0.933787 | 0.096312  | 5.612031 |
| yfhD | -0.060793 | -0.000643 | 0.383832 |
| pepB | -0.220292 | -0.038384 | 1.21942  |
| uhpT | -0.485893 | -0.095583 | 2.995232 |
| pheA | -0.59915  | 0.190835  | 3.222094 |
| ydcU | -0.803481 | 0.179583  | 4.216006 |
| potC | -0.827306 | 0.254119  | 3.726805 |
| ybaN | -0.603781 | 0.18629   | 2.766617 |
| yebS | -0.891415 | 0.312151  | 5.919214 |
| yeiW | -0.239344 | 0.089484  | 1.664824 |
| ydiP | -0.933877 | 0.443875  | 5.583132 |
| modC | -0.7413   | 0.548326  | 4.670755 |
| ygeD | -0.330833 | 0.208926  | 1.716558 |
| nrfA | -0.398141 | 0.201366  | 2.091399 |
| yiaF | 1.144365  | 0.330954  | 2.604539 |
| dcm  | 1.114579  | 0.481459  | 2.527851 |
| yibl | 0.500573  | 0.187541  | 1.058843 |
| yhhX | 1.883684  | 0.628062  | 3.523236 |
| yigB | 0.602356  | 0.232219  | 1.139884 |
| ychF | 0.84679   | 0.307827  | 1.619293 |
| yjcR | 2.520795  | 0.691846  | 4.950608 |
| mntH | 0.772822  | 0.214562  | 1.572674 |
| yjdK | 1.081009  | 0.22041   | 2.151079 |
| arpA | 0.470373  | 0.110549  | 0.929229 |
| ypdA | 0.729114  | 0.175493  | 1.421361 |
| malP | 0.778073  | -0.286447 | 1.806801 |
| tdcA | 0.369757  | -0.120543 | 0.954084 |
| ydcA | 0.386639  | -0.120062 | 1.013957 |
| nupG | 1.062053  | -0.363269 | 3.33083  |
| yajD | 0.754562  | -0.204749 | 2.678207 |
| metR | 0.827326  | -0.150761 | 2.753697 |

|      |          |           |          |
|------|----------|-----------|----------|
| argP | 0.82343  | -0.12204  | 2.806839 |
| ykgM | 1.260034 | -0.227602 | 3.397331 |
| gudX | 1.014775 | -0.115766 | 3.005456 |
| paaE | 0.634501 | -0.053539 | 1.867793 |
| yhjX | 0.61106  | 0.012112  | 1.71013  |
| alsA | 1.355434 | 0.082384  | 3.693389 |
| abrB | 0.700154 | 0.009828  | 1.841127 |
| sodA | 1.853776 | 0.217541  | 4.935549 |
| yieH | 0.639027 | 0.070186  | 2.073877 |
| ynaA | 0.228938 | 0.006691  | 0.688169 |
| yjcC | 0.804467 | 0.174472  | 2.263882 |
| gidA | 1.658666 | 0.284016  | 4.602251 |
| mdlB | 1.130207 | 0.258469  | 2.945305 |
| mioC | 0.689149 | 0.071602  | 1.685019 |
| hokA | 1.2368   | 0.118373  | 2.964276 |
| alr  | 1.163865 | 0.096691  | 2.821306 |
| mcrA | 1.096144 | 0.186854  | 2.557011 |
| pck  | 1.14098  | -0.037745 | 2.442844 |
| ybeX | 1.143625 | -0.046543 | 2.296779 |
| tsgA | 0.657224 | -0.042383 | 1.254756 |
| ppc  | 0.695326 | -0.106532 | 1.401264 |
| hyaE | 0.481704 | -0.056394 | 0.906335 |
| yhhM | 0.845506 | -0.097831 | 1.634456 |
| yraK | 0.984533 | -0.088636 | 2.324765 |
| abgT | 1.29851  | -0.311554 | 2.711324 |
| mdtG | 0.234788 | -0.051905 | 0.506278 |
| yihN | 0.653815 | -0.182403 | 1.250745 |
| ygiN | 1.44358  | -0.289585 | 2.72852  |
| ygjO | 0.196337 | -0.023714 | 0.301068 |
| yjaB | 1.529564 | -0.153516 | 2.461844 |
| nrdE | 0.881675 | -0.048829 | 1.294077 |
| yfhB | 0.682497 | 0.028613  | 1.002806 |
| yjfC | 0.739535 | 0.031108  | 1.121045 |
| ugpE | 2.254457 | 0.186002  | 3.862247 |
| ygaU | 1.484661 | 0.059923  | 2.665433 |
| cheW | 0.398219 | -0.204138 | 0.594198 |
| dgoK | 1.682678 | -0.619338 | 2.598666 |
| pqiA | 0.844109 | -0.331181 | 1.448835 |
| erfK | 0.55533  | -0.230533 | 0.986012 |
| yqhA | 0.300257 | -0.079801 | 0.436927 |
| yigL | 0.971191 | -0.26383  | 1.409699 |
| ygiT | 0.738813 | -0.204347 | 1.300042 |
| bcp  | 0.844302 | -0.248334 | 1.416244 |
| ygaC | 1.002096 | -0.208635 | 1.587557 |
| rseC | 1.182581 | -0.404272 | 6.639774 |
| paaJ | 0.133595 | -0.080963 | 0.891223 |
| srlE | 0.512289 | -0.111861 | 4.21326  |
| xylG | 0.22737  | -0.091167 | 1.706404 |
| fic  | 0.384902 | -0.14691  | 2.979383 |
| mbhA | 0.421379 | -0.139552 | 3.410328 |
| yfjU | 0.3308   | -0.261209 | 3.453698 |
| yjjU | 0.913567 | -0.024966 | 3.510234 |
| kbaY | 0.329459 | -0.038076 | 1.529528 |
| nlpA | 0.16657  | -0.019848 | 0.806048 |
| slp  | 0.284126 | -0.023989 | 1.253673 |
| leuC | 0.419332 | -0.02863  | 1.8165   |
| yrdB | 0.642122 | -0.091437 | 2.679351 |
| yobG | 0.966388 | -0.079124 | 5.124504 |
| ybaK | 0.269599 | 0.011826  | 1.486667 |
| elaC | 0.434669 | 0.026734  | 2.418594 |
| intA | 0.572407 | 0.025093  | 3.772473 |

|      |           |           |          |
|------|-----------|-----------|----------|
| yidA | 0.213258  | 0.004924  | 1.56549  |
| ygaY | 0.231972  | -0.025659 | 1.548523 |
| yjiP | 0.872979  | -0.127744 | 5.739649 |
| ilvB | 0.244111  | 0.049866  | 1.520106 |
| astB | 0.383129  | 0.182326  | 2.525369 |
| gspD | 0.473315  | 0.210551  | 2.827606 |
| ftn  | 0.345122  | 0.11442   | 2.077212 |
| yafE | 0.601878  | 0.255352  | 4.264755 |
| nhoA | 0.274899  | -0.207666 | 1.021061 |
| yjcF | 0.737507  | -0.651196 | 2.953837 |
| yqiC | 0.377149  | -0.401592 | 1.490022 |
| cysD | 0.424557  | -0.511597 | 1.995762 |
| yiaV | 0.318561  | -0.334823 | 1.85937  |
| ygdE | 0.205557  | -0.227768 | 1.197796 |
| yegQ | 0.265642  | -0.209274 | 1.237462 |
| ascG | 0.216129  | -0.122647 | 0.852124 |
| ygiP | 0.899815  | -0.454558 | 3.463845 |
| yphG | 1.05178   | -0.425242 | 3.824257 |
| yodD | 0.221448  | -0.109353 | 1.034078 |
| srlD | 0.176473  | -0.093577 | 0.517803 |
| ade  | 1.36003   | -0.87313  | 4.374964 |
| rhtA | 0.739629  | -0.382257 | 2.471225 |
| pspB | -0.008194 | -1.156346 | 3.184318 |
| yfeO | -0.058205 | -0.78731  | 2.332786 |
| ymdF | -0.033669 | -1.379386 | 4.209447 |
| ybbL | -0.061639 | -0.576221 | 1.504568 |
| yhhP | 0.098313  | -0.542713 | 1.843021 |
| yggC | 0.083232  | -0.629602 | 2.056236 |
| intQ | 0.017697  | -0.248273 | 0.907058 |
| yjiM | 0.183767  | -0.603097 | 1.914214 |
| ybjO | 0.379027  | -0.531699 | 2.982127 |
| pnuC | 0.114214  | -0.159808 | 1.013331 |
| dadA | 0.260496  | -0.272681 | 2.447287 |
| yifB | 0.257108  | -0.380919 | 3.228979 |
| cysN | 0.32636   | -0.555372 | 3.88391  |
| ymbA | 0.014691  | -0.076868 | 0.476457 |
| purU | 0.066421  | -0.253011 | 1.705745 |
| yghF | 0.047974  | -0.124766 | 0.893018 |
| yfmM | 0.098757  | -0.255935 | 1.493661 |
| stpA | 0.115066  | -0.253089 | 1.522617 |
| clpX | 0.272324  | -0.576136 | 2.442361 |
| cobU | 0.205397  | -0.380308 | 1.506318 |
| yjgK | 0.244258  | -0.387295 | 1.773274 |
| caiF | 0.101176  | -0.359829 | 1.666931 |
| gatD | 0.275618  | -1.172497 | 5.310177 |
| nrfC | 0.107444  | -0.432688 | 2.253379 |
| yohK | 0.151441  | -0.399264 | 1.703884 |
| tpr  | 0.269747  | -0.71891  | 3.439121 |
| yjjQ | 0.113716  | -0.292058 | 1.342578 |
| ygeV | -0.073099 | -0.705119 | 3.943148 |
| yqfA | -0.098091 | -0.760703 | 3.559429 |
| sgcB | 0.729604  | -0.56371  | 1.337782 |
| galE | 0.656324  | -0.507149 | 1.198113 |
| yjcE | 0.780226  | -0.509223 | 1.467073 |
| yghK | 1.255264  | -0.918824 | 2.506948 |
| ytjB | 0.973672  | -0.976579 | 2.090966 |
| htpX | 0.414616  | -0.413321 | 0.864017 |
| gudP | 0.495122  | -0.49463  | 1.09232  |
| yjcO | 0.941081  | -0.826173 | 1.963453 |
| ybcC | 0.088907  | -0.051026 | 0.215779 |
| copA | 0.861169  | -0.598621 | 1.998976 |

|      |           |           |          |
|------|-----------|-----------|----------|
| yqil | 0.413156  | -0.269038 | 0.97024  |
| hisB | 0.460467  | -0.236952 | 0.961962 |
| nrfG | 0.0741    | -0.084261 | 0.261659 |
| ychn | 0.205681  | -0.162908 | 0.590216 |
| rfaJ | 0.778136  | -0.619714 | 2.30792  |
| yghG | 1.163554  | -0.901763 | 3.543776 |
| creD | 0.198714  | -0.221995 | 0.554334 |
| yfhL | 0.451152  | -0.412365 | 1.181526 |
| potD | 0.299222  | -0.66688  | 2.086886 |
| yfdY | 0.108893  | -0.217399 | 0.700034 |
| yicN | 0.244691  | -0.494154 | 1.638967 |
| nrfF | 0.216     | -0.386633 | 1.243917 |
| yqaA | 0.243992  | -0.50353  | 1.485192 |
| ygaF | 0.727103  | -1.481443 | 4.327728 |
| ybfN | 0.192051  | -0.304879 | 1.125635 |
| fecB | 0.503075  | -0.898676 | 3.12235  |
| cspG | 0.351395  | -0.720484 | 1.739794 |
| yobF | 0.151369  | -0.367187 | 0.761585 |
| rhsD | 0.179176  | -0.514143 | 1.115861 |
| ybaM | 0.14639   | -0.514181 | 1.087675 |
| ypjM | 0.579066  | -2.186976 | 4.499282 |
| aes  | 0.10526   | -0.518275 | 1.129724 |
| rnr  | 1.170422  | -1.965617 | 3.801262 |
| alpA | 0.386307  | -0.606241 | 1.334075 |
| recX | 0.374405  | -0.546656 | 1.263254 |
| wbbJ | 0.54181   | -0.717306 | 1.56729  |
| degQ | 0.317575  | -0.696249 | 1.083166 |
| ydil | 0.295139  | -0.609312 | 0.979762 |
| ycaK | 0.265037  | -0.633888 | 1.0598   |
| alsB | -0.554775 | 1.160165  | 1.171663 |
| entC | -0.839009 | 1.763497  | 1.705013 |
| yjhV | -0.344432 | 0.801714  | 0.746715 |
| mdtI | -0.38031  | 0.974176  | 0.870605 |
| yabl | -0.935841 | 2.21929   | 2.331517 |
| dos  | -0.367451 | 1.019903  | 1.08621  |
| ynfE | -1.113721 | 2.12659   | 2.233119 |
| yfbN | -0.401214 | 0.735184  | 0.809773 |
| ycjQ | -0.290152 | 0.518497  | 0.578138 |
| sbcB | -1.021832 | 2.061848  | 2.300187 |
| ycfT | -0.389035 | 0.77425   | 0.872581 |
| betB | -1.134397 | 2.196455  | 2.484045 |
| argT | -0.66134  | 2.267922  | 1.944897 |
| ytfF | -0.343734 | 1.045646  | 0.943163 |
| hycl | -0.208307 | 0.629172  | 0.574836 |
| gcvT | -0.358097 | 1.160282  | 0.94918  |
| fhuD | -0.403208 | 1.229476  | 0.992036 |
| clcB | -0.21777  | 0.361222  | 0.476602 |
| umuD | -0.498919 | 0.87461   | 1.159261 |
| melB | -0.342273 | 0.739164  | 0.94954  |
| ylbF | -0.537401 | 1.1404    | 1.391624 |
| fsaB | -1.322711 | 2.550087  | 3.393978 |
| ycjS | -0.733923 | 1.413914  | 1.841045 |
| yejO | -1.036461 | 1.327807  | 2.070992 |
| flgE | -0.607334 | 0.805133  | 1.294197 |
| sfmA | -0.598043 | 0.919305  | 1.479092 |
| napB | -0.746143 | 1.172515  | 1.838524 |
| rfbX | -0.753095 | 1.180972  | 1.739473 |
| ylbA | -0.800051 | 1.228636  | 1.854822 |
| ypdF | -0.303568 | 0.447252  | 0.685747 |
| cheY | -0.545509 | 0.685865  | 0.91162  |
| yjeP | -0.542717 | 0.645938  | 0.975112 |

|      |           |          |          |
|------|-----------|----------|----------|
| lysA | -0.670148 | 0.813188 | 1.199193 |
| yciH | -0.899214 | 1.058114 | 2.256561 |
| ydaT | -0.508805 | 0.719019 | 1.363675 |
| nhaR | -0.698895 | 1.453528 | 2.137569 |
| flgJ | -0.645096 | 1.204755 | 1.856184 |
| yebR | -0.813413 | 1.544412 | 2.761619 |
| ypdD | -0.59077  | 1.149615 | 2.153875 |
| yncH | -0.917027 | 1.572706 | 3.010079 |
| ycbT | -0.32892  | 0.587106 | 1.024337 |
| kdpC | -0.805975 | 1.384002 | 2.333394 |
| bcsZ | -0.135185 | 0.525672 | 0.564918 |
| citD | -0.185532 | 0.78471  | 0.804003 |
| hipB | -0.216738 | 0.841925 | 0.963339 |
| yaaA | -0.488643 | 2.564381 | 2.932491 |
| btuF | -0.561313 | 3.118315 | 3.767546 |
| flgC | -0.295776 | 1.424158 | 1.701058 |
| uxaB | -0.151135 | 0.679992 | 0.830771 |
| yhiF | -0.523519 | 1.347206 | 1.855698 |
| yehT | -0.632474 | 1.965148 | 2.617037 |
| kefG | -0.221697 | 0.715894 | 0.924342 |
| ygcE | -0.336669 | 1.188061 | 1.577885 |
| napA | -0.756542 | 1.92252  | 2.241597 |
| lysR | -0.264495 | 0.77272  | 0.888423 |
| lsrG | -0.474787 | 1.492432 | 1.777134 |
| ptsA | -0.826185 | 2.290086 | 2.857273 |
| yahF | -1.132052 | 3.392513 | 4.253129 |
| rihC | -0.245677 | 1.024836 | 1.433467 |
| yfaP | -0.28437  | 1.691215 | 2.250444 |
| caiB | -0.398167 | 2.15835  | 3.014567 |
| yqeJ | -0.13548  | 0.779298 | 1.072326 |
| rbsB | -0.821679 | 3.507461 | 5.483146 |
| glpT | -0.283248 | 1.151863 | 1.793505 |
| sufS | -0.233545 | 1.089983 | 1.714871 |
| yfeX | -0.383508 | 2.210531 | 3.276785 |
| adiA | -0.54096  | 1.410927 | 2.153922 |
| fucU | -0.392605 | 1.229865 | 1.901093 |
| trmA | -0.297134 | 0.907204 | 1.453378 |
| eda  | -0.736109 | 1.639006 | 2.823935 |
| ycaR | -0.661858 | 1.588834 | 2.744594 |
| yfcJ | -0.246995 | 0.649941 | 1.103195 |
| tyrP | -0.391594 | 1.101943 | 1.879395 |
| yhdW | -0.470539 | 1.497313 | 2.778862 |
| ydeP | -0.319952 | 0.9085   | 1.633551 |
| gst  | -0.135327 | 0.418741 | 0.73017  |
| yehW | -0.245117 | 0.870354 | 1.503531 |
| pdxA | -0.510088 | 1.630097 | 2.700071 |
| yafQ | -0.18562  | 0.60242  | 1.014112 |
| yqcE | -0.627444 | 0.568768 | 1.130413 |
| ycbF | -1.45056  | 1.468368 | 2.889384 |
| yeaT | -0.376639 | 0.398469 | 0.746758 |
| cspF | -0.458131 | 0.307567 | 0.668617 |
| ycbQ | -0.990572 | 0.607749 | 1.350728 |
| ydgT | -1.304584 | 1.084047 | 2.088933 |
| yrbA | -0.800414 | 0.627631 | 1.273227 |
| ybdA | -0.793666 | 0.643608 | 1.086315 |
| yjeH | -1.076791 | 0.570318 | 1.685634 |
| lysP | -1.263165 | 0.600226 | 1.918414 |
| hisA | -0.922005 | 0.32917  | 1.27136  |
| ydhC | -1.095089 | 0.442989 | 1.536815 |
| citF | -1.362113 | 0.52107  | 1.63813  |
| prkB | -0.615567 | 0.655181 | 2.093698 |

|      |           |           |          |
|------|-----------|-----------|----------|
| elaA | -0.497074 | 0.500401  | 1.557484 |
| ycaL | -0.867101 | 0.696333  | 2.673792 |
| chbA | -0.931004 | 1.31299   | 3.655996 |
| sufB | -0.163733 | 0.214964  | 0.616824 |
| yjeT | -0.657483 | 0.851744  | 2.783425 |
| artM | -0.738109 | 0.993761  | 3.07203  |
| yzfA | -0.470815 | 0.410601  | 1.276781 |
| metE | -0.341832 | 0.338636  | 0.895669 |
| relE | -1.189727 | 1.341572  | 3.711378 |
| wrbA | -0.702566 | 0.729987  | 2.02346  |
| grxB | -0.90939  | 1.181106  | 2.805278 |
| yedL | -0.752447 | 1.019184  | 2.382937 |
| yfbM | -0.521493 | 0.632328  | 1.485482 |
| yohG | -0.989266 | 1.210901  | 2.881924 |
| osmE | -0.800022 | 0.613581  | 1.589302 |
| znuA | -0.708366 | 0.501197  | 1.336883 |
| dacD | -0.198504 | 0.136351  | 0.364889 |
| maoC | -0.48911  | 0.430709  | 1.112299 |
| ydeU | -0.906536 | 0.543659  | 1.942428 |
| yibH | -0.698729 | 0.416102  | 1.405512 |
| fhuE | -0.280634 | 0.166718  | 0.567023 |
| allA | -0.584485 | 0.369345  | 1.343564 |
| yeiL | -0.232834 | 0.15699   | 0.509968 |
| ydhF | -1.24304  | 0.943628  | 2.763892 |
| flhE | -0.58815  | 0.815182  | 0.846882 |
| tyrR | -0.419748 | 0.521113  | 0.563175 |
| yicO | -0.824808 | 0.871022  | 0.801395 |
| yfcU | -0.403927 | 0.491434  | 0.409164 |
| yeiB | -0.994855 | 1.408784  | 1.232033 |
| citE | -1.018481 | 1.316889  | 1.16575  |
| yrat | -0.593164 | 0.820594  | 0.548638 |
| ycaN | -0.766008 | 1.117754  | 0.839391 |
| wcaF | -0.687314 | 0.94168   | 0.485238 |
| flgL | -0.435352 | 0.560805  | 0.350563 |
| agaV | -0.964929 | 1.199014  | 0.716938 |
| yfjT | -0.382949 | 0.456041  | 0.249843 |
| ybeF | -0.622009 | 0.672972  | 0.389545 |
| fliF | -0.945001 | 1.667355  | 0.824715 |
| ykgA | -0.685734 | 1.325379  | 0.698153 |
| ypdG | -0.624857 | 1.148027  | 0.867822 |
| ucpA | -0.503832 | 0.958376  | 0.704325 |
| hisC | -0.433973 | 1.003013  | 0.639057 |
| yfaW | -0.561039 | 1.344533  | 1.009342 |
| ynal | -0.279769 | 0.619241  | 0.440412 |
| yecI | -0.974067 | -0.494358 | 1.474041 |
| modB | -1.835174 | -0.620369 | 2.610558 |
| phoH | -0.49077  | -0.166577 | 0.745086 |
| ydfX | -1.318991 | -0.532443 | 1.964601 |
| rstB | -0.685475 | -0.441741 | 0.981722 |
| yjgA | -1.458889 | -0.725168 | 1.568481 |
| yedA | -0.879236 | -0.459951 | 0.977785 |
| yneI | -1.036688 | -0.466623 | 1.147064 |
| ydiK | -0.751099 | -0.145969 | 0.875719 |
| ynbA | -0.439932 | -0.086378 | 0.555363 |
| motA | -0.434248 | -0.093677 | 0.476438 |
| yegE | -0.7373   | -0.147459 | 0.764286 |
| crl  | -0.202156 | -0.044088 | 0.21302  |
| sprT | -1.203349 | -0.315796 | 1.272282 |
| narJ | -0.888683 | -0.162895 | 0.83545  |
| yoaG | -0.652732 | -0.196305 | 0.350307 |
| cysQ | -1.075969 | -0.33106  | 0.665507 |

|      |           |           |          |
|------|-----------|-----------|----------|
| ycct | -0.46968  | -0.142109 | 0.30632  |
| slyD | -0.307251 | -0.111322 | 0.233012 |
| cysA | -1.261772 | -0.444531 | 1.09222  |
| ydhJ | -1.458563 | -0.681746 | 1.081513 |
| ydaQ | -1.41976  | 0.024106  | 0.846418 |
| otsA | -0.829042 | -0.017345 | 0.433966 |
| yahK | -1.663743 | -0.030413 | 0.838569 |
| uvrC | -0.714149 | 0.025893  | 0.27205  |
| yeaS | -0.784214 | 0.16834   | 0.96605  |
| ybfG | -0.704379 | 0.097391  | 0.755474 |
| ybdH | -0.521218 | 0.004864  | 0.486774 |
| ybaQ | -1.30714  | 0.010344  | 1.272462 |
| ydgK | -0.777994 | 0.095825  | 0.520061 |
| cysC | -0.880824 | 0.100666  | 0.653457 |
| ydiO | -0.70593  | 0.079993  | 0.575502 |
| apt  | -1.729378 | -0.035055 | 1.275075 |
| ydeO | -0.703294 | -0.10666  | 1.964388 |
| artJ | -0.757765 | -0.125908 | 2.198675 |
| rhsE | -0.958643 | -0.154588 | 2.578302 |
| yjgW | -0.327917 | -0.052591 | 0.80567  |
| yedM | -0.18098  | -0.009028 | 0.617995 |
| ydaE | -0.173937 | -0.005857 | 0.547939 |
| yobD | -0.472206 | 0.048117  | 1.733027 |
| ycfQ | -0.227873 | -0.046328 | 0.738047 |
| yebW | -0.294289 | -0.050434 | 1.131335 |
| chaB | -0.460797 | 0.101854  | 1.298461 |
| ynfB | -0.93267  | 0.130938  | 2.488775 |
| feaB | -1.015629 | 0.054776  | 2.571588 |
| yaeB | -0.812324 | -0.333125 | 2.277887 |
| ygfS | -0.601842 | -0.241137 | 1.93611  |
| iaaA | -0.666893 | -0.270531 | 2.005752 |
| yfdE | -0.30821  | -0.164635 | 0.888243 |
| mall | -0.47017  | -0.279185 | 1.268546 |
| ycgG | -0.542001 | -0.357648 | 1.423796 |
| astA | -0.709276 | -0.526595 | 2.501634 |
| malX | -0.640599 | -0.448757 | 2.433296 |
| yjfN | -0.26655  | -0.257519 | 1.159841 |
| ypfJ | -0.366786 | -0.229077 | 1.557591 |
| yaaJ | -0.586322 | -0.229248 | 1.195269 |
| yqfB | -0.259186 | -0.114767 | 0.500276 |
| yedP | -0.813232 | -0.460135 | 1.805058 |
| yraR | -0.406437 | -0.221076 | 0.820117 |
| yniA | -1.971    | -0.313386 | 3.368749 |
| idnD | -0.3734   | -0.109853 | 0.788754 |
| ydhO | -0.758019 | -0.225808 | 1.758072 |
| ydgR | -0.642314 | -0.147091 | 1.353049 |
| ymgA | -1.83998  | -0.345814 | 3.870338 |
| ytfM | -0.419932 | 0.110302  | 0.937836 |
| yneF | -1.070506 | 0.340214  | 2.578587 |
| ygeR | -1.225814 | 0.306941  | 3.035014 |
| gadC | -1.395666 | 0.228888  | 3.331327 |
| yjhD | -0.395087 | 0.123296  | 0.820909 |
| ydjL | -1.059196 | 0.356456  | 2.330818 |
| fucR | -1.238224 | 0.559344  | 3.52795  |
| ompG | -0.485484 | 0.199339  | 1.168313 |
| ydcO | -0.94568  | 0.507134  | 2.337054 |
| yfdZ | -0.529962 | 0.270408  | 1.19232  |
| ygjE | -0.26966  | 0.032372  | 0.440631 |
| spy  | -0.434898 | 0.030933  | 0.675749 |
| ybdD | -1.341898 | 0.010371  | 1.940697 |
| narK | -1.275672 | -0.003728 | 1.735078 |

|      |           |           |          |
|------|-----------|-----------|----------|
| hypD | -0.633071 | 0.002992  | 1.243868 |
| ycjD | -0.969551 | -0.034889 | 2.014068 |
| ydhK | -0.896912 | 0.16379   | 1.875339 |
| ycdX | -0.567768 | 0.053092  | 1.057351 |
| yeaJ | -0.577431 | 0.076386  | 1.12341  |
| yniD | -0.652169 | 0.184293  | 1.114982 |
| ykfG | -0.144972 | -0.308243 | 0.964303 |
| znuB | -0.476053 | -0.803712 | 2.43352  |
| yggE | -0.496185 | -0.889526 | 2.424379 |
| yeaV | -0.867522 | -0.869584 | 3.015832 |
| yqcC | -0.527729 | -0.684957 | 2.173922 |
| modA | -0.729199 | -1.67725  | 3.515563 |
| ybhG | -0.385521 | -0.694713 | 1.682568 |
| cynR | -0.293099 | -0.468777 | 1.155732 |
| glpK | -0.343558 | -1.250309 | 2.556794 |
| yphH | -0.176854 | -0.643051 | 1.350146 |
| pnp  | -0.157828 | -0.516932 | 1.41812  |
| mipA | -0.397355 | -1.32047  | 3.407877 |
| glnK | -0.409705 | -1.664555 | 4.149072 |
| ydiN | -0.29121  | -0.497674 | 2.096872 |
| proY | -0.378582 | -0.58918  | 2.485467 |
| ypfN | -0.62006  | -0.863608 | 3.278934 |
| yfaZ | -0.073584 | -0.105587 | 0.578115 |
| narL | -0.351193 | -0.557443 | 2.799919 |
| yfcN | -0.25052  | -0.561446 | 2.849279 |
| lplA | -0.234703 | -0.223639 | 2.163362 |
| ccmH | -0.352149 | -0.21666  | 2.518213 |
| pin  | -0.381909 | -0.277941 | 2.265479 |
| yfjM | -0.695901 | -0.40443  | 3.869899 |
| gabP | -0.358305 | -0.339619 | 2.286764 |
| kdgK | -0.328404 | -0.571552 | 0.721035 |
| yeeW | -0.416237 | -0.740672 | 1.002211 |
| ydiL | -0.472812 | -0.828069 | 1.125849 |
| ydfP | -0.197939 | -0.614085 | 0.986854 |
| ycdY | -0.166125 | -0.381597 | 0.625675 |
| yjhS | -0.359998 | -0.622858 | 1.144    |
| yfbR | -0.883014 | -1.494685 | 2.89421  |
| clpP | -0.956436 | -1.054199 | 2.083185 |
| yciF | -0.867801 | -1.068483 | 2.036054 |
| ybjK | -0.407487 | -0.408036 | 0.742174 |
| ychQ | -1.369545 | -1.263581 | 2.281608 |
| amiB | -0.524656 | -0.416255 | 1.083307 |
| rtcA | -0.567885 | -0.427984 | 1.209586 |
| ydiM | -1.537193 | -1.596946 | 4.314069 |
| priC | -0.68199  | -0.643058 | 1.881047 |
| sapA | -1.037822 | -0.850651 | 2.906164 |
| ymfQ | -0.12191  | -0.152439 | 0.359932 |
| yedR | -0.187919 | -1.170327 | 1.474953 |
| moaC | 0.061273  | -0.744908 | 1.771128 |
| yfaV | 0.003223  | -0.381934 | 0.81887  |
| yceA | 0.002201  | -0.100993 | 0.215226 |
| paaK | 0.03515   | -1.19862  | 2.674537 |
| ynfP | -0.0036   | -0.629983 | 1.288674 |
| ynfH | -0.049688 | -0.667516 | 1.449937 |
| ygeM | -0.026841 | -0.427535 | 0.739065 |
| yodC | -0.017391 | -0.357091 | 0.644762 |
| ycaC | -0.027539 | -0.235941 | 0.394773 |
| ydfJ | -0.140277 | -1.122515 | 1.9451   |
| mfd  | 0.025174  | -0.405439 | 0.750004 |
| glnL | 0.092782  | -0.669031 | 1.223308 |
| yhjV | -0.025707 | -1.031141 | 1.637069 |



|      |          |           |          |
|------|----------|-----------|----------|
| ung  | 0.025714 | -1.256381 | 1.932306 |
| nrdD | 0.245236 | -2.276713 | 3.603559 |
| yhhN | 0.151543 | -1.537772 | 2.539978 |
| yibA | 0.079062 | -0.517953 | 0.641216 |
| iap  | 0.151173 | -1.362744 | 1.490581 |
| gabT | 0.529175 | -1.79186  | 2.727241 |
| tiaE | 0.343009 | -1.353207 | 2.070215 |
| hmp  | 0.036126 | -0.161082 | 0.265604 |
| yaiY | 0.094947 | -0.724723 | 1.001411 |
| alsE | 0.10087  | -0.819819 | 1.175191 |
| yjhA | 0.138479 | -0.791875 | 1.143451 |
| sdaA | 0.027264 | -0.747535 | 1.016601 |
| uraA | 0.359105 | -0.262159 | 0.332251 |
| bcsC | 0.703669 | -0.570505 | 0.753146 |
| yibF | 0.836544 | -0.500922 | 0.723917 |
| gltF | 0.670509 | -0.338382 | 0.610384 |
| nrfB | 1.365215 | -0.651402 | 1.106125 |
| pflC | 0.751819 | -0.631259 | 1.012958 |
| malM | 0.940466 | -0.695551 | 1.407647 |
| secB | 1.261565 | -0.902774 | 1.458306 |
| yjfl | 0.080926 | -0.05724  | 0.100102 |
| acs  | 0.270698 | -0.163175 | 0.334717 |
| yggV | 1.810301 | -1.122953 | 2.215644 |
| glvB | 1.445747 | -0.868452 | 1.619693 |
| mcrC | 1.362696 | -0.87022  | 1.541677 |
| yjbL | 0.819446 | -0.406343 | 0.934477 |
| citX | 0.424338 | -0.206094 | 0.438725 |
| ygfU | 1.84749  | -0.768768 | 1.770175 |
| sseA | 0.829198 | -0.23823  | 0.93147  |
| dsdC | 1.358284 | -0.485638 | 1.574543 |
| yadG | 0.373024 | -0.077888 | 0.250954 |
| stfE | 0.542667 | -0.177022 | 0.426937 |
| zur  | 1.667276 | -0.441094 | 1.233035 |
| wzzE | 1.618754 | -0.566417 | 1.042888 |
| manA | 1.254766 | -0.446542 | 0.793424 |
| ygiF | 1.10358  | -0.439299 | 0.738556 |
| ykgL | 1.778549 | -0.542095 | 0.944766 |
| dtd  | 1.07739  | -0.514563 | 0.55381  |
| ylil | 0.493526 | -0.279709 | 0.322071 |
| yjaH | 0.468535 | -0.555433 | 0.809735 |
| frwD | 0.434389 | -0.49884  | 0.850491 |
| yiiX | 0.825058 | -1.402393 | 1.597776 |
| yeeZ | 0.150264 | -0.267502 | 0.378342 |
| fecE | 0.775289 | -1.495744 | 1.927008 |
| argH | 0.839186 | -1.728765 | 2.2254   |
| yiiU | 0.897516 | -1.082439 | 1.224184 |
| ygaQ | 0.971518 | -1.433273 | 1.503959 |
| livG | 1.341547 | -2.321851 | 2.053138 |
| yedE | 0.707394 | -1.434222 | 1.199591 |
| glnQ | 0.101447 | -0.281746 | 0.261624 |
| yncM | 0.346431 | -0.894546 | 0.939863 |
| yhfT | 0.142732 | -0.559481 | 0.462627 |
| ruvA | 1.914107 | -2.322792 | 1.635974 |
| ydfH | 0.540565 | -0.55399  | 0.50079  |
| thiH | 0.811142 | -0.639164 | 0.471879 |
| yacH | 0.439581 | -0.401724 | 0.276801 |
| rfe  | 0.747645 | -0.888932 | 0.243873 |
| rob  | 0.631982 | -0.773377 | 0.277564 |
| yhiP | 0.922539 | -1.29711  | 0.55369  |
| yihX | 0.91649  | -1.34576  | 0.438223 |
| zraS | 1.382581 | -1.229471 | 0.255628 |

|      |           |           |           |
|------|-----------|-----------|-----------|
| yqiA | 1.379676  | -1.244281 | 0.540069  |
| yebC | 0.732357  | -1.038153 | 0.062479  |
| yqaE | 1.216356  | -1.448578 | 0.151485  |
| pepT | 0.537299  | -1.274954 | 0.235153  |
| hyuA | 0.269222  | -0.681042 | 0.101961  |
| yjiR | 0.601691  | -1.468955 | 0.113046  |
| ybiS | 0.536392  | -1.499821 | 0.133023  |
| ompX | 0.426764  | -1.528913 | 0.275396  |
| ydbK | 0.37925   | -0.798133 | 0.26884   |
| yliK | 0.645705  | -1.101598 | 0.276811  |
| sufI | 0.438812  | -0.764297 | 0.385491  |
| dmsB | 0.940121  | -1.946363 | 0.923955  |
| yeiQ | 0.731421  | -1.78162  | 0.812624  |
| ppiA | -0.871762 | 0.972812  | -0.010561 |
| ybeD | -0.582908 | 0.525618  | 0.021908  |
| ydeT | -1.105255 | 1.081148  | 0.021538  |
| fliT | -0.533922 | 0.518048  | 0.024881  |
| yigA | -0.453416 | 0.289906  | 0.010788  |
| yjcZ | -0.56296  | 0.402605  | 0.043658  |
| ydjK | -0.906265 | 0.626584  | 0.088017  |
| chpS | -1.070295 | 0.835214  | 0.06848   |
| asnB | -0.780679 | 0.589914  | 0.062635  |
| ymfE | -0.46407  | 0.379864  | 0.015355  |
| rpiA | -0.286731 | 0.21615   | 0.102144  |
| leuB | -0.978768 | 0.883636  | 0.428171  |
| mlrA | -0.306645 | 0.241977  | 0.151292  |
| creA | -1.083974 | 1.794452  | 0.388139  |
| torT | -0.503765 | 0.761935  | 0.290642  |
| exuR | -0.315169 | 0.487248  | 0.150181  |
| cusA | -0.83398  | 0.778575  | 0.217297  |
| metH | -0.330749 | 0.402899  | 0.065237  |
| yeaU | -0.900717 | 1.028346  | 0.221125  |
| wcaE | -0.448612 | 0.536917  | 0.188276  |
| leuA | -1.308283 | 1.969548  | 0.054071  |
| yaiV | -0.241171 | 0.382257  | 0.038297  |
| yehl | -1.225837 | 0.554221  | -0.22944  |
| yejK | -1.934673 | 0.985206  | -0.514243 |
| hybG | -0.518754 | 0.322823  | -0.067097 |
| rsxG | -0.550043 | 0.296027  | -0.051281 |
| yohO | -0.97769  | 0.714183  | -0.102155 |
| yfeS | -0.599466 | 0.429774  | -0.161596 |
| ynbD | -1.462687 | 0.609975  | -0.099463 |
| agaW | -1.655656 | 0.551858  | -0.154796 |
| mgIB | -1.018454 | 0.24354   | -0.165252 |
| hcaT | -0.37429  | 0.101862  | -0.066026 |
| yoaE | -1.152488 | 0.486227  | 0.393035  |
| ydgC | -1.274225 | 0.46308   | 0.313902  |
| aaeR | -0.61138  | 0.246835  | 0.169649  |
| cvpA | -1.02949  | 0.536576  | 0.238188  |
| yeaO | -0.550234 | 0.279259  | 0.166007  |
| yehA | -1.234202 | 0.650965  | 0.39744   |
| gcvH | -1.09903  | 0.440737  | 0.162172  |
| pheL | -0.352017 | 0.081828  | 0.159878  |
| hisP | -1.017349 | 0.416629  | 0.599301  |
| ilvM | -0.238492 | 0.083841  | 0.150135  |
| cld  | -0.442532 | 0.210237  | 0.223986  |
| rfdD | -1.105104 | 0.499201  | 1.146314  |
| hcaB | -1.561107 | 0.878439  | 1.558448  |
| hypB | -0.255613 | 0.086143  | 0.204448  |
| ygdD | -0.666027 | 0.579099  | 0.712526  |
| ygaX | -0.908331 | 0.646089  | 0.88917   |

|      |           |          |           |
|------|-----------|----------|-----------|
| ddg  | -0.971484 | 0.783718 | 0.687534  |
| ylbG | -0.743573 | 0.602573 | 0.600611  |
| yddE | -0.73156  | 0.441928 | 0.503041  |
| uspF | -0.935246 | 0.518503 | 0.665603  |
| sapB | -0.617892 | 3.287908 | -3.683641 |
| yceJ | -0.035626 | 0.257437 | -0.276307 |
| ycjX | -0.123862 | 1.381793 | -1.527479 |
| dcuR | -0.035566 | 0.717206 | -0.783221 |
| yieG | -0.141052 | 1.479066 | -2.055687 |
| ydiY | -0.096319 | 0.515947 | -0.648049 |
| sgrR | -0.11286  | 1.036573 | -1.002941 |
| yliC | -0.096785 | 1.343138 | -1.29722  |
| yafS | -0.025542 | 1.213752 | -1.086903 |
| yoeF | -0.008883 | 0.134268 | -0.116566 |
| panD | 0.069573  | 2.279396 | -2.168342 |
| fimC | -0.743305 | 1.803395 | -1.23831  |
| pyrD | -0.385373 | 0.961189 | -0.671482 |
| deaD | -0.999861 | 2.704548 | -2.058249 |
| gloB | -0.394126 | 1.088747 | -0.826432 |
| yoaF | -0.063929 | 0.551132 | -0.428151 |
| frlC | -0.298261 | 1.676432 | -1.177024 |
| ybdR | -0.215018 | 1.201829 | -0.9638   |
| yfdQ | -0.054212 | 0.267636 | -0.206021 |
| yaeQ | -0.41118  | 1.315078 | -1.330254 |
| yhbP | -0.230874 | 0.780684 | -0.661252 |
| cfa  | -0.585155 | 1.83244  | -1.67226  |
| mprA | -0.623966 | 2.109761 | -1.888397 |
| ydgJ | -0.071687 | 0.310878 | -0.277581 |
| ycbC | -0.136781 | 0.651875 | -0.562953 |
| nrdH | -0.246511 | 0.851204 | -0.39868  |
| ychJ | -0.377505 | 1.320037 | -0.652838 |
| fimI | -0.43804  | 2.080885 | -0.891043 |
| yfcR | -0.205233 | 0.871201 | -0.412546 |
| fliR | -0.362616 | 1.453591 | -0.831023 |
| pabC | -0.776067 | 4.802498 | -2.401578 |
| rpiR | -0.13442  | 0.832163 | -0.498148 |
| sapD | -0.921415 | 3.879714 | -1.227162 |
| nagE | -0.190771 | 0.996088 | -0.3536   |
| yhfG | -0.625225 | 2.067837 | -0.652776 |
| ygfA | -0.217052 | 2.639084 | -0.673297 |
| ybjG | -0.103743 | 1.414284 | -0.431997 |
| yqhC | -0.169589 | 1.141299 | -0.28815  |
| yciS | -0.185827 | 1.597821 | -0.653064 |
| php  | 0.108308  | 1.256855 | -0.437911 |
| prfC | 0.271522  | 2.22838  | -0.828878 |
| gspA | 0.14191   | 1.623927 | -0.661043 |
| treC | 0.493534  | 2.906747 | -1.133485 |
| metL | -0.024126 | 2.024184 | -0.491026 |
| ybcK | 0.079131  | 2.336146 | -0.699847 |
| recD | 0.193054  | 1.401531 | -0.403398 |
| sfsB | 0.229312  | 1.94824  | -0.555953 |
| pspE | 0.024213  | 0.320087 | -0.070449 |
| yejL | 0.530554  | 2.46259  | -0.584418 |
| pbpG | 0.285293  | 1.140429 | -0.383186 |
| yccK | 0.003034  | 0.966806 | -0.660426 |
| msrA | 0.02307   | 0.989092 | -0.662786 |
| cpxA | 0.023099  | 3.205364 | -1.908684 |
| dcd  | 0.090402  | 3.502452 | -1.574207 |
| rpsT | 0.07481   | 2.451355 | -1.271815 |
| yegl | -0.012866 | 0.401    | -0.197926 |
| yagV | 0.150489  | 1.309425 | -0.726518 |

|      |          |          |           |
|------|----------|----------|-----------|
| gcvA | 1.147978 | 2.209022 | -1.437992 |
| malQ | 0.961549 | 1.915904 | -1.227368 |
| yihU | 0.81034  | 1.442319 | -1.055022 |
| cytR | 0.476959 | 0.995737 | -0.68875  |
| spr  | 1.919383 | 4.283311 | -3.186609 |
| cyoE | 0.811696 | 1.647237 | -1.26806  |
| yafU | 0.777275 | 1.593405 | -1.164284 |
| ygaZ | 0.729076 | 2.071501 | -1.393385 |
| hisJ | 0.790088 | 2.14151  | -1.33691  |
| ygfB | 0.556621 | 1.30347  | -0.770726 |
| sgcQ | 0.208847 | 0.502364 | -0.313461 |
| ybjN | 0.36978  | 0.83226  | -0.465203 |
| yfiH | 0.266436 | 0.975614 | -0.587886 |
| rnd  | 0.141105 | 0.477812 | -0.297712 |
| pyrL | 0.287029 | 1.057834 | -0.703746 |
| ybhH | 0.167824 | 0.647514 | -0.355131 |
| ygiC | 0.416146 | 1.30542  | -0.597842 |
| yheL | 0.354217 | 1.333472 | -1.203197 |
| ldcC | 0.445363 | 2.060809 | -1.7902   |
| exoX | 0.109076 | 0.808741 | -0.674971 |
| yfbJ | 0.35111  | 1.731418 | -1.160645 |
| exbD | 0.343557 | 1.572812 | -1.160044 |
| ygdR | 0.280896 | 1.424619 | -1.10225  |
| ppk  | 0.566154 | 1.91426  | -1.961092 |
| dgoR | 0.299376 | 0.817559 | -0.966091 |
| yaiS | 0.156944 | 0.455895 | -0.505694 |
| mngR | 0.285681 | 0.748116 | -0.703367 |
| abgB | 0.331734 | 0.894492 | -0.763782 |
| yibN | 1.312895 | 3.131521 | -2.711756 |
| yciB | 0.598428 | 0.906056 | -0.980135 |
| yfiR | 0.915729 | 1.163037 | -1.060424 |
| usg  | 1.153445 | 1.428788 | -1.480417 |
| glpD | 0.568354 | 0.751051 | -0.756135 |
| speB | 0.639154 | 1.015645 | -0.913335 |
| ykgH | 0.636044 | 0.967013 | -0.795775 |
| poxA | 0.344895 | 2.073631 | -2.472554 |
| rpmH | 0.163329 | 1.413742 | -1.566218 |
| exo  | 0.19888  | 1.259597 | -1.415774 |
| ppx  | 0.551248 | 1.533178 | -2.202755 |
| ymjB | 0.56339  | 1.531814 | -2.221637 |
| yfdH | 0.482691 | 1.613293 | -2.688416 |
| btuB | 0.229815 | 1.961117 | -2.700349 |
| ygbT | 0.149914 | 0.722877 | -1.052204 |
| fabF | 0.611281 | 2.530882 | -3.626739 |
| ygdK | 0.094929 | 0.493646 | -0.6781   |
| nusB | 1.240866 | 1.48687  | -2.040213 |
| yhaL | 0.634482 | 1.258919 | -1.491284 |
| fis  | 2.345375 | 4.651232 | -5.73476  |
| yhhT | 1.056917 | 1.939627 | -2.481778 |
| basS | 0.76617  | 1.217756 | -1.975322 |
| basR | 0.58087  | 0.84643  | -1.36618  |
| rhoL | 0.393555 | 0.574551 | -0.878321 |
| yeaD | 0.155002 | 0.249075 | -0.35704  |
| pflB | 1.463459 | 2.786167 | -4.242902 |
| glmM | 1.272297 | 1.538112 | -2.87035  |
| ycaO | 0.899251 | 0.781048 | -1.928247 |
| tldD | 0.809753 | 0.742878 | -1.859443 |
| gadW | 0.426867 | 0.397138 | -0.871824 |
| ldcA | 1.188382 | 1.196568 | -2.471233 |
| ybcV | 0.413666 | 0.608403 | -1.221905 |
| ygeN | 0.149398 | 0.279669 | -0.557523 |

|      |           |          |           |
|------|-----------|----------|-----------|
| ygcl | 0.135939  | 0.27175  | -0.478132 |
| yeiM | 0.247981  | 0.482712 | -1.124529 |
| yhal | 0.135217  | 0.318706 | -0.657129 |
| ybcS | 0.146517  | 0.472175 | -0.973788 |
| pmbA | 0.17942   | 0.546416 | -1.135512 |
| rpmJ | 0.266972  | 1.778643 | -4.18965  |
| yqgC | 0.093145  | 0.549935 | -1.183521 |
| cdh  | 0.143115  | 0.798968 | -1.757184 |
| yicL | 0.295918  | 1.389374 | -3.172454 |
| torI | 0.071794  | 0.469899 | -0.956457 |
| dppB | 0.610863  | 1.222567 | -3.459661 |
| gph  | 0.302371  | 0.592419 | -1.853611 |
| yfcD | 0.155149  | 0.47704  | -1.505251 |
| galS | 0.305432  | 0.855467 | -2.800334 |
| acrF | 0.100742  | 0.211547 | -0.761336 |
| yaiX | 0.276911  | 0.55576  | -1.906217 |
| fecA | 0.184861  | 0.548888 | -1.463726 |
| yqjA | 0.184172  | 0.625779 | -1.708386 |
| yfgH | 0.097523  | 0.382219 | -1.048863 |
| yfcM | 0.430339  | 1.809355 | -5.029717 |
| ycaP | 0.025493  | 0.469992 | -1.134559 |
| yfgM | 0.025578  | 0.284183 | -0.846899 |
| trpR | 0.045081  | 0.32246  | -0.885967 |
| ycjU | -0.153507 | 0.937581 | -2.452367 |
| rpmE | -0.073122 | 1.012199 | -2.611523 |
| gor  | -0.164784 | 0.590991 | -0.956151 |
| ybeA | -0.040061 | 0.178933 | -0.272441 |
| ubiH | -0.329082 | 1.096003 | -1.65468  |
| ycdS | -0.737509 | 2.263794 | -3.304692 |
| yiaK | -0.108518 | 0.430672 | -0.805244 |
| rnk  | -0.309889 | 1.208665 | -2.135731 |
| fdhD | -0.164484 | 0.514336 | -0.947142 |
| emrB | -0.176358 | 0.582443 | -1.092346 |
| yfgF | -0.07667  | 0.28606  | -0.609878 |
| rsuA | -0.346785 | 1.421446 | -2.889628 |
| ybcJ | -0.412463 | 0.860356 | -1.576853 |
| rhtB | -0.176827 | 0.356367 | -0.662346 |
| bgIX | -0.387383 | 0.720575 | -1.403307 |
| yihO | -0.465507 | 0.955078 | -1.542944 |
| rfbA | -0.390393 | 0.882336 | -1.392918 |
| yihG | -0.05684  | 0.910765 | -1.783847 |
| nfi  | -0.05498  | 0.391949 | -0.674783 |
| pykF | -0.037095 | 0.87378  | -1.509047 |
| lysU | 0.055547  | 0.793368 | -1.386985 |
| ybiJ | 0.026291  | 1.367682 | -2.01698  |
| gutQ | 0.030728  | 1.894629 | -2.884875 |
| thrB | -0.483691 | 0.393457 | -1.541038 |
| mhpA | -0.286938 | 0.244804 | -1.024082 |
| yfbS | -0.760182 | 0.706769 | -2.395637 |
| yehM | -0.354551 | 0.358589 | -1.190684 |
| yjjZ | -0.462413 | 0.522696 | -1.563452 |
| essD | -0.240896 | 0.191995 | -0.693657 |
| yejA | -0.497357 | 0.415496 | -1.46052  |
| yafM | -0.705852 | 0.523709 | -1.570148 |
| yjaG | -1.158989 | 0.872638 | -2.728771 |
| proW | -0.462649 | 0.350193 | -1.156041 |
| smf  | -0.812637 | 0.934407 | -1.944667 |
| ybfP | -0.463008 | 0.667686 | -1.383414 |
| ybaD | -0.778069 | 0.918088 | -2.388005 |
| seqA | -1.373546 | 1.894822 | -4.567141 |
| ulaG | -0.44305  | 0.884358 | -2.552861 |

|      |           |          |           |
|------|-----------|----------|-----------|
| tauB | -0.224203 | 0.414962 | -1.166184 |
| ynfD | -0.327572 | 0.580424 | -1.645275 |
| pcnB | -0.743205 | 1.644917 | -4.894827 |
| mdoC | -0.452516 | 0.684653 | -1.971019 |
| ligT | -0.746845 | 1.10035  | -4.060967 |
| smg  | -0.583255 | 0.808887 | -2.780927 |
| ydhP | -0.681778 | 1.859489 | -0.48693  |
| hofC | -0.676038 | 1.617697 | -0.436638 |
| creB | -0.279807 | 0.628688 | -0.200284 |
| djlC | -0.385256 | 0.858604 | -0.113548 |
| rbsC | -0.445392 | 1.089786 | -0.136388 |
| yeiC | -0.463604 | 1.120511 | -0.109563 |
| btuD | -0.535012 | 1.236983 | -0.24428  |
| yebQ | -0.593822 | 1.310063 | -0.273454 |
| aceF | -0.797079 | 3.235541 | -0.08603  |
| cadA | -0.869375 | 2.822421 | -0.129008 |
| ydiF | -0.329657 | 1.098885 | -0.12584  |
| yhcD | -0.418017 | 1.32008  | -0.19398  |
| ydaY | -0.177011 | 0.631197 | -0.105285 |
| pcm  | -0.299419 | 0.505877 | -0.073369 |
| purT | -0.830869 | 1.270293 | -0.477905 |
| fliQ | -0.63193  | 1.092381 | -0.355434 |
| yraH | -0.206726 | 0.373743 | -0.103047 |
| yfaD | -0.726668 | 0.785152 | -0.365178 |
| ydiH | -0.405463 | 0.455754 | -0.18274  |
| yegR | -0.341551 | 0.784178 | -0.432041 |
| fimB | -0.27831  | 0.570435 | -0.315373 |
| yghZ | -0.597185 | 1.235164 | -0.761132 |
| yaaY | -0.947889 | 2.018623 | -0.934967 |
| yohH | -0.393272 | 0.833387 | -0.413128 |
| htpG | -0.302109 | 0.623949 | -0.309354 |
| cspD | -0.516765 | 0.860125 | -0.431426 |
| yfjG | -0.36455  | 0.436516 | -0.264292 |
| fucO | -0.576386 | 0.813592 | -0.476327 |
| fadR | -1.051471 | 1.473713 | -1.138622 |
| dgsA | -1.9123   | 2.58655  | -1.972478 |
| ypjK | -0.768702 | 0.946808 | -0.702021 |
| rsmC | -0.330972 | 0.243768 | -0.228541 |
| btuE | -0.789143 | 0.693555 | -0.595406 |
| cobC | -0.590466 | 0.438909 | -0.589659 |
| yniB | -0.550142 | 0.494799 | -0.547141 |
| dicB | -1.978375 | 1.810674 | -1.962854 |
| yhgN | -0.403731 | 0.236049 | -0.305804 |
| phoB | -0.071343 | 0.038371 | -0.050222 |
| hyaF | -0.254844 | 0.143623 | -0.144256 |
| yjch | -0.173081 | 0.370653 | -0.495047 |
| dinB | -0.337819 | 0.674616 | -0.75015  |
| yhdY | -1.014053 | 0.970538 | -1.327781 |
| ybgS | -0.716968 | 0.646913 | -0.852598 |
| cusB | -0.583599 | 0.525339 | -0.803216 |
| nadA | -0.458891 | 0.488068 | -0.68794  |
| potE | -0.222263 | 0.219821 | -0.349954 |
| flgH | -0.294253 | 0.378965 | -0.529157 |
| hcaE | -0.747405 | 0.891946 | -1.296868 |
| ydjG | -0.816829 | 1.032441 | -1.342991 |
| ybcQ | -0.430857 | 0.650192 | -0.785672 |
| yafL | -0.29425  | 0.370525 | -0.61514  |
| astE | -0.400817 | 0.509267 | -0.783617 |
| ygbF | -0.998913 | 0.519286 | -1.679788 |
| yacL | -0.668284 | 0.374341 | -1.212512 |
| yccS | -0.82384  | 0.536723 | -1.574305 |

|      |           |           |           |
|------|-----------|-----------|-----------|
| trkA | -0.940075 | 0.825708  | -1.776132 |
| tesB | -0.534715 | 0.323665  | -0.776599 |
| rluB | -0.950907 | 0.70471   | -1.420092 |
| entB | -0.877585 | 0.41128   | -1.033791 |
| yedO | -0.943658 | 0.468701  | -1.063825 |
| zwf  | -1.784272 | 0.178536  | -0.559204 |
| stfR | -1.390102 | 0.141525  | -0.437395 |
| ydjJ | -1.415803 | 0.248889  | -0.533756 |
| yfbG | -0.963096 | 0.15058   | -0.335973 |
| yfiM | -0.46707  | 0.151727  | -0.211921 |
| lhr  | -0.310011 | 0.092255  | -0.133581 |
| slyB | -0.662925 | 0.273626  | -0.259823 |
| ndk  | -2.674304 | 0.328997  | -1.853079 |
| mdoG | -2.899691 | 0.750492  | -1.5781   |
| ihfB | -2.449598 | 0.6295    | -1.663031 |
| gatY | -0.830819 | 0.015507  | -0.382346 |
| cysZ | -0.800978 | -0.04881  | -0.420415 |
| clpA | -1.448869 | -0.070833 | -0.93443  |
| pdxJ | -1.717687 | -0.101304 | -0.536637 |
| gcvR | -1.864632 | -0.231777 | -0.751898 |
| yecM | -1.869809 | -0.186817 | -0.699966 |
| yeiE | -0.7773   | -0.03838  | -0.316697 |
| ymfl | -0.669976 | 0.04442   | -0.663424 |
| ybjM | -0.277923 | 0.049734  | -0.332499 |
| ydaW | -0.65739  | 0.085829  | -0.795118 |
| serC | -2.17064  | -0.185871 | -1.973504 |
| serA | -1.352647 | -0.132792 | -1.204162 |
| adhP | -1.598972 | -0.09122  | -1.706335 |
| gatC | -2.133049 | -0.790637 | -0.66786  |
| ybiP | -0.873122 | -0.278593 | -0.279776 |
| miaB | -1.451351 | -0.366362 | -0.702867 |
| cedA | -0.812509 | -0.214475 | -0.357713 |
| mhpT | -1.14391  | -0.3342   | -0.507506 |
| manY | -2.179517 | -0.645621 | -1.27463  |
| tfaD | -0.720527 | -0.359407 | -0.393224 |
| yebE | -0.515848 | -0.227983 | -0.280909 |
| ydhS | -0.29081  | -0.13426  | -0.169722 |
| yoaA | -0.964865 | -0.442372 | -0.476106 |
| yahJ | -0.379653 | -0.179118 | -0.174652 |
| yjiK | -0.83667  | -0.385549 | -0.588784 |
| treA | -0.385015 | -0.156268 | -0.253976 |
| potI | -0.836211 | -0.308222 | -0.555184 |
| tdcG | -0.22607  | -0.064065 | -0.182951 |
| pepP | -0.531509 | -0.157612 | -0.463272 |
| ihfA | -2.526009 | -0.912099 | -2.25931  |
| dicC | -1.039302 | -0.321539 | -0.778041 |
| ynfN | -1.122605 | -0.334605 | -0.842276 |
| yohL | -1.173923 | -0.544036 | -1.034926 |
| ebgC | -0.656105 | -0.329175 | -0.577014 |
| ycjN | -0.474994 | 0.084954  | 0.07216   |
| ydiS | -1.419346 | 0.043913  | 0.310707  |
| yeaY | -1.119593 | 0.035285  | 0.17099   |
| ycgM | -1.52938  | -0.053755 | 0.171563  |
| fsr  | -1.300891 | 0.009791  | 0.03146   |
| fucA | -0.828723 | -0.072646 | 0.029694  |
| oppB | -0.749926 | -0.063714 | -0.023976 |
| ydbC | -1.184267 | -0.126722 | -0.001582 |
| gatZ | -1.595624 | 0.130905  | -0.234799 |
| pntA | -0.360146 | 0.045094  | -0.041859 |
| yoeB | -1.193702 | 0.106816  | -0.074715 |
| yeaX | -1.232838 | 0.04236   | -0.143097 |

|      |           |           |           |
|------|-----------|-----------|-----------|
| ddpC | -0.245784 | -0.019204 | -0.043305 |
| yccU | -0.541241 | -0.02372  | -0.091057 |
| nac  | -1.043104 | -0.501721 | 0.28615   |
| tar  | -1.211047 | -0.436274 | 0.18921   |
| tam  | -0.867587 | -0.298243 | 0.184619  |
| puuC | -0.987238 | -0.372847 | 0.209028  |
| sra  | -1.259655 | -0.355074 | 0.306105  |
| ycbW | -0.501655 | -0.158816 | 0.170323  |
| mog  | -2.242777 | -0.756033 | -0.09492  |
| dps  | -0.937562 | -0.328632 | -0.0371   |
| srlB | -0.706637 | -0.206674 | -0.046205 |
| flxA | -1.657322 | -0.660698 | -0.292455 |
| tbpA | -0.157073 | -0.063938 | 0.009106  |
| ubiG | -0.171909 | -0.093405 | 0.023432  |
| cbpA | -0.450745 | -0.2465   | 0.011071  |
| bcr  | -0.977181 | -0.709588 | -0.003563 |
| argA | -0.970513 | -0.61776  | 0.024812  |
| iscR | -2.166785 | -1.633672 | -0.580498 |
| yfeY | -0.283504 | -0.232284 | -0.077839 |
| mraZ | -2.271098 | -2.1096   | -0.551835 |
| dbpA | -0.895182 | -0.753763 | -0.154513 |
| fumC | -0.795162 | -0.795341 | -0.131582 |
| yahB | -2.133585 | -1.362134 | -0.439522 |
| yfeW | -1.220749 | -0.757291 | -0.206696 |
| tsr  | -2.802049 | -2.304299 | -2.07087  |
| ydeE | -0.35883  | -0.272655 | -0.278851 |
| yecS | -0.931984 | -0.759864 | -0.593585 |
| dld  | -0.788623 | -0.663483 | -0.541591 |
| gdhA | -1.086967 | -1.10033  | -0.856376 |
| hycG | -0.660004 | -0.396277 | -0.310914 |
| ssuD | -1.321225 | -0.735177 | -0.636718 |
| paal | -0.583775 | -0.397782 | -0.264904 |
| entE | -1.279115 | -0.835222 | -0.622141 |
| ssuB | -1.03626  | -0.764969 | -0.615132 |
| paaC | -1.088528 | -0.743975 | -0.582924 |
| yjdl | -0.387129 | -0.471298 | -0.156794 |
| yebK | -0.668715 | -0.817576 | -0.251736 |
| astC | -0.445367 | -0.497952 | -0.157461 |
| cirA | -0.550803 | -0.578682 | -0.230157 |
| yjiE | -0.665569 | -0.978315 | -0.318427 |
| ycaJ | -1.062818 | -1.429631 | -0.539283 |
| yciG | -1.352987 | -1.814232 | -0.732892 |
| folM | -0.419328 | -0.492281 | -0.082725 |
| ompN | -0.780408 | -0.941787 | -0.176889 |
| cysB | -0.86222  | -0.837483 | -0.428839 |
| rtn  | -0.800471 | -0.782884 | -0.377097 |
| trpC | -1.865928 | -1.661749 | -0.981524 |
| yddK | -0.774026 | -0.761198 | -0.476048 |
| ydiT | -0.396544 | -0.41489  | -0.256126 |
| amn  | -1.186849 | -1.334811 | -0.699359 |
| ydhV | -1.296913 | -1.394318 | -0.717498 |
| tynA | -1.380769 | -1.627254 | -0.728402 |
| sgcC | -0.798305 | -1.002414 | -0.534728 |
| yjbO | -0.284434 | -0.388374 | -0.196637 |
| aegA | -0.997525 | -1.326821 | -0.703222 |
| dinI | -0.559651 | -0.795475 | -0.378475 |
| yegL | -0.793344 | -1.110322 | -0.708991 |
| yedY | -1.397903 | -1.830758 | -1.275522 |
| fecD | -1.281319 | -1.586878 | -0.989935 |
| pbpC | -0.342243 | -0.490959 | 0.24782   |
| abgA | -0.430728 | -0.603804 | 0.323414  |



|      |           |           |          |
|------|-----------|-----------|----------|
| ycgJ | -0.525173 | -0.687602 | 0.250229 |
| yeeV | -0.261543 | -0.257631 | 0.004132 |
| yfcP | -1.071384 | -1.135345 | 0.018949 |
| hdhA | -0.633265 | -0.783709 | 0.150926 |
| cysK | -0.903701 | -1.014701 | 0.221441 |
| glyA | -0.79215  | -0.843905 | 0.146082 |
| kdpE | -1.037931 | -1.181703 | 0.189543 |
| ydhL | -1.03469  | -1.401715 | 0.116577 |
| tdcC | -0.923648 | -0.50517  | 0.498705 |
| ynbE | -0.720266 | -0.500233 | 0.393282 |
| rssB | -0.805581 | -0.797276 | 0.342154 |
| kdgT | -1.114395 | -1.136641 | 0.449491 |
| ydhB | -0.697591 | -0.647428 | 0.254975 |
| yjbQ | -0.607482 | -0.397264 | 0.209742 |
| yciE | -1.162859 | -0.72078  | 0.465789 |
| tehB | -0.890468 | -0.683516 | 0.356923 |
| ynjB | -0.831445 | -0.631334 | 0.323304 |
| cysU | -1.378969 | -0.970885 | 0.352314 |
| maa  | -0.885629 | -0.825994 | 1.0884   |
| yfcV | -0.373671 | -0.372639 | 0.504235 |
| ycgE | -0.581987 | -0.439782 | 0.664248 |
| hokB | -0.112484 | -0.140788 | 0.174808 |
| yajR | -0.439528 | -0.564762 | 0.615007 |
| ybaB | -1.149352 | -1.44088  | 1.584741 |
| dmsD | -0.571019 | -0.632418 | 0.735764 |
| yeel | -0.999482 | -1.13692  | 1.19465  |
| fdnH | -0.41843  | -0.339591 | 0.337336 |
| yecF | -0.996697 | -0.811916 | 0.852732 |
| ydcJ | -1.029632 | -0.850346 | 0.737918 |
| solA | -2.710521 | -1.797998 | 2.341089 |
| yjfM | -0.403201 | -0.345049 | 0.416135 |
| ybiO | -0.584381 | -0.48498  | 0.577483 |
| ydhY | -1.160792 | -0.993897 | 1.091188 |
| amyA | -1.259611 | -1.527668 | 1.109527 |
| yiiS | -1.725663 | -1.947606 | 1.813376 |
| yebT | -0.498572 | -0.538548 | 0.503846 |
| azoR | -0.102049 | -0.354851 | 0.25419  |
| miaA | -0.280513 | -1.129881 | 0.757801 |
| ydhZ | -0.08305  | -0.318577 | 0.215131 |
| yhbH | -0.071082 | -0.230446 | 0.179529 |
| ydel | -0.507431 | -1.560661 | 1.278765 |
| ycdO | -0.750094 | -2.200176 | 1.755453 |
| ygjV | -0.511315 | -1.364178 | 1.176522 |
| ymcD | -0.366772 | -1.016643 | 0.752483 |
| lon  | -0.740502 | -3.591922 | 3.220497 |
| setA | -0.159272 | -0.879642 | 0.757571 |
| yijP | -0.60753  | -2.926097 | 2.450496 |
| apaH | -0.334371 | -1.605538 | 1.599226 |
| yehP | -0.254701 | -0.797204 | 0.85733  |
| ycdH | -0.458004 | -1.094275 | 1.223959 |
| ycgX | -0.253775 | -0.798288 | 0.750093 |
| yihF | -0.319011 | -0.697597 | 0.375796 |
| sanA | -1.392239 | -3.488194 | 1.818195 |
| mutH | -0.651656 | -1.392015 | 0.638931 |
| ybgD | -0.992865 | -1.585944 | 1.054766 |
| ydhT | -0.981996 | -2.305973 | 1.621299 |
| ycdK | -0.988176 | -1.849277 | 1.16676  |
| prpC | -0.909097 | -1.985161 | 1.235874 |
| bgIA | -0.918588 | -1.461383 | 1.202627 |
| rarA | -0.909649 | -1.743072 | 1.453348 |
| edd  | -0.897705 | -1.733718 | 1.373957 |

|      |           |           |           |
|------|-----------|-----------|-----------|
| trxC | -0.598943 | -1.028292 | 1.044796  |
| rhaD | -0.23553  | -1.091082 | 0.330282  |
| yifE | -0.898124 | -4.140138 | 1.437382  |
| yfhQ | -0.722124 | -3.754371 | 1.390866  |
| nadB | -0.248951 | -1.481869 | 0.608893  |
| phnG | -0.305231 | -0.948935 | 0.361546  |
| fepE | -0.070282 | -0.345316 | 0.175221  |
| agaB | -0.429182 | -2.037177 | 1.06034   |
| ybaT | -0.644211 | -2.476666 | 1.244015  |
| dhaL | -0.257461 | -1.585702 | 0.87504   |
| araF | 0.002095  | -0.211082 | 0.09294   |
| acpT | 0.052403  | -2.697148 | 1.216345  |
| yfaO | -0.02428  | -0.97814  | 0.533405  |
| yqgB | -0.039613 | -1.007083 | 0.546757  |
| rph  | -0.122265 | -3.666289 | 2.065974  |
| yqeI | 0.040773  | -1.656584 | 0.841775  |
| ymgH | 0.002186  | -1.368677 | 0.706791  |
| agaR | 0.099313  | -2.147623 | 1.221041  |
| yfbV | -0.049559 | -0.467981 | 0.337956  |
| ycgl | -0.136558 | -1.478633 | 1.018394  |
| yjfK | -0.125411 | -0.87725  | 0.583865  |
| pqiB | -0.079192 | -1.794194 | 1.446012  |
| yadB | -0.068508 | -3.062943 | 2.219895  |
| hybC | 0.013495  | -1.068515 | 1.016526  |
| frwB | -0.288113 | -1.013784 | -0.092089 |
| yjiZ | -0.163473 | -0.446771 | -0.02566  |
| dadX | -0.262359 | -0.776778 | -0.131719 |
| yciV | -0.302117 | -0.983089 | -0.172143 |
| yciN | -0.380802 | -2.048052 | 0.078696  |
| yaaX | -0.255325 | -1.015574 | 0.081533  |
| ydfI | -0.411977 | -0.803965 | -0.180022 |
| trg  | -0.700334 | -1.481345 | -0.219474 |
| yihD | -0.486912 | -0.836318 | -0.032209 |
| ybeT | -0.694255 | -1.1659   | -0.055073 |
| cueR | -0.259238 | -0.445799 | -0.026522 |
| fimZ | -0.562837 | -0.868875 | -0.116887 |
| ydcF | -0.456264 | -0.996071 | 0.251324  |
| hsdM | -0.575354 | -1.417488 | 0.44979   |
| ompT | -0.825782 | -1.862056 | 0.658763  |
| tauD | -0.467585 | -1.613591 | 0.438908  |
| ymfG | -0.27398  | -0.791758 | 0.187417  |
| ycgB | -0.404289 | -1.087621 | 0.255343  |
| yajI | -0.481694 | -1.324252 | 0.29435   |
| cchA | -0.249268 | -0.63497  | 0.126481  |
| yahM | -1.782487 | -5.10538  | 0.810357  |
| hchA | -0.495831 | -1.556994 | 0.285812  |
| galT | -0.614223 | -1.396455 | 0.043798  |
| thil | -0.650496 | -1.730119 | 0.188218  |
| trpL | -0.943045 | -2.428766 | 0.174796  |
| allR | -0.445634 | -0.922337 | 0.169941  |
| ygaP | -0.331647 | -0.670808 | 0.096135  |
| yoaB | -0.387739 | -0.915896 | 0.13483   |
| sdiA | -0.330195 | -0.811401 | 0.129023  |
| blr  | 0.835852  | -0.123065 | 0.179838  |
| yigI | 1.611654  | -0.304357 | 0.213016  |
| ygcP | 0.944493  | -0.245353 | 0.175383  |
| dcrB | 1.287375  | -0.272021 | 0.260342  |
| yjbF | 0.821976  | -0.409903 | 0.256775  |
| yqeC | 1.302593  | -0.564326 | 0.287065  |
| artI | 1.08757   | -0.481309 | 0.210016  |
| ampE | 1.929546  | -1.181851 | 0.392493  |

|      |          |           |           |
|------|----------|-----------|-----------|
| yjcQ | 0.661515 | -0.277628 | -0.082989 |
| cadB | 1.417479 | -0.611098 | -0.060384 |
| ybaA | 0.993947 | -0.465433 | -0.086113 |
| yfjY | 0.950019 | -0.250345 | -0.090715 |
| rsd  | 1.364492 | -0.347694 | -0.124212 |
| trpA | 0.129387 | -0.108817 | 0.010113  |
| rplI | 1.061246 | -0.855965 | -0.018706 |
| yfdL | 0.893211 | -0.685459 | -0.000255 |
| viaH | 1.511367 | -1.117783 | -0.153625 |
| lldP | 0.807684 | -0.517541 | -0.16905  |
| yibG | 1.547236 | -0.000071 | -0.848272 |
| frdA | 2.917412 | -0.150499 | -1.643201 |
| yieF | 0.605726 | -0.074993 | -0.274131 |
| yjbG | 0.433175 | -0.055048 | -0.192969 |
| yqeB | 0.290594 | -0.038592 | -0.116107 |
| yidB | 0.860899 | -0.234561 | -0.245403 |
| inaA | 1.08287  | -0.248446 | -0.276    |
| paaX | 0.694356 | -0.140436 | -0.218083 |
| galK | 0.537477 | -0.082387 | -0.183338 |
| ulaB | 0.855343 | -0.130393 | -0.23651  |
| ypjB | 0.90956  | -0.225921 | -0.362887 |
| yddW | 0.624579 | 0.079022  | -0.312854 |
| yagS | 2.816909 | 0.249577  | -1.396755 |
| ttdA | 0.847839 | 0.101236  | -0.304914 |
| dsdX | 0.595839 | 0.064039  | -0.247402 |
| hsdS | 1.68692  | 0.262254  | -0.681701 |
| argF | 4.532295 | 0.883172  | -2.716538 |
| yjjY | 1.946348 | -0.280514 | -0.057902 |
| phnM | 0.513669 | -0.054155 | -0.033179 |
| phnE | 1.54684  | -0.05055  | -0.087095 |
| yobH | 0.768864 | -0.13765  | 0.032692  |
| yqeH | 0.561939 | 0.046187  | -0.032412 |
| ydcT | 1.357005 | 0.02654   | 0.091765  |
| ybaS | 1.187269 | 0.094457  | 0.056783  |
| yjfF | 0.870276 | 0.121319  | -0.231334 |
| yhbU | 0.673802 | 0.09713   | -0.109511 |
| phnP | 0.614342 | -0.016424 | -0.118241 |
| yagE | 3.971057 | -0.070508 | -0.677154 |
| ykfA | 2.664767 | 0.042103  | -0.401809 |
| iclR | 0.865027 | -0.005466 | -0.779706 |
| yliH | 0.692172 | -0.086455 | -0.700798 |
| metF | 1.338205 | -0.208573 | -1.394102 |
| udp  | 0.709593 | -0.098151 | -0.671553 |
| hypC | 0.796978 | -0.083874 | -0.735695 |
| argB | 1.499235 | -0.178799 | -1.303913 |
| yrfA | 2.08656  | -0.490067 | -2.408326 |
| viaW | 0.614873 | -0.126899 | -0.692539 |
| yjgB | 0.622667 | -0.008489 | -0.450863 |
| ybiR | 1.949938 | 0.012418  | -1.397596 |
| tesA | 0.854159 | 0.039855  | -0.674829 |
| rbbA | 1.068353 | 0.178386  | -0.838894 |
| cmtB | 0.912318 | 0.157329  | -1.403266 |
| sgbE | 1.127171 | 0.157704  | -1.861801 |
| yjjX | 1.209989 | 0.055739  | -1.838197 |
| rhtC | 1.088336 | 0.243036  | -2.025085 |
| aldB | 1.149272 | 0.258026  | -2.053313 |
| fixB | 0.375461 | 0.065316  | -0.697913 |
| yrfB | 0.818125 | 0.08884   | -1.482222 |
| ppdB | 0.493774 | 0.050648  | -1.019289 |
| asnA | 0.646881 | -0.063037 | -1.190546 |
| yjiN | 0.201802 | -0.018205 | -0.386138 |

|      |          |           |           |
|------|----------|-----------|-----------|
| ybfC | 0.438583 | 0.01211   | -0.751213 |
| yjiM | 0.523189 | -0.006138 | -0.961507 |
| thiG | 0.692366 | -0.034598 | -1.034895 |
| cpsB | 0.533095 | -0.055791 | -0.842233 |
| ybbD | 1.084892 | -0.037966 | -1.778161 |
| relA | 1.518597 | -0.094876 | -2.509285 |
| hybE | 0.70369  | -0.065883 | -0.974472 |
| ibpA | 0.802407 | -0.018903 | -0.994406 |
| ybil | 1.559734 | -0.019784 | -2.03231  |
| ampH | 1.2098   | 0.098679  | -1.594057 |
| ykiA | 0.456607 | 0.06447   | -0.56331  |
| yagB | 1.405063 | 0.126406  | -1.583041 |
| nrfE | 1.056155 | 0.606124  | -1.901269 |
| fhuC | 0.532008 | 0.208261  | -0.921029 |
| ycjV | 0.668858 | 0.3368    | -1.276531 |
| mrcB | 1.743324 | 0.741051  | -3.47611  |
| pIdA | 0.580648 | 0.181211  | -0.894789 |
| glgS | 0.323257 | 0.066709  | -0.461965 |
| bioB | 0.456407 | 0.085914  | -0.637756 |
| mmuM | 1.70438  | 0.436269  | -2.2094   |
| gapA | 0.929656 | 0.377399  | -1.142508 |
| yhdE | 1.327523 | -0.371699 | -1.885887 |
| rimI | 0.349502 | -0.102107 | -0.477835 |
| yjgI | 1.053966 | -0.227581 | -1.511357 |
| ybhS | 1.673709 | -0.698921 | -2.580221 |
| grxA | 1.114011 | -0.461413 | -1.710757 |
| tkkB | 0.717953 | -0.319134 | -1.25194  |
| ilvE | 1.146733 | -0.475234 | -1.952576 |
| chbG | 0.657238 | -0.267776 | -1.067305 |
| gldA | 1.146726 | -0.292645 | -1.931208 |
| psiF | 0.544686 | -0.179319 | -0.883621 |
| yhjC | 0.703983 | -0.169584 | -1.344723 |
| dgoA | 1.532372 | -0.449709 | -2.855976 |
| yagY | 1.148982 | -0.370622 | -2.208108 |
| ypjC | 1.356599 | -0.354513 | -2.440295 |
| kdsC | 2.144624 | -0.967748 | -2.718046 |
| ygeQ | 1.657555 | -0.650464 | -2.204001 |
| ilvY | 0.936925 | -0.413833 | -1.325715 |
| lysS | 0.522926 | -0.303665 | -0.715201 |
| yjhT | 1.225402 | -0.80733  | -2.043379 |
| yidX | 1.417866 | -0.917251 | -2.354254 |
| yagW | 1.097322 | -0.54447  | -1.68864  |
| ascF | 0.451249 | -0.244427 | -0.679673 |
| ytfR | 0.44769  | 0.355099  | -0.515859 |
| yfiL | 1.052704 | 0.731442  | -1.112861 |
| yggJ | 0.801069 | 0.458605  | -0.833433 |
| ydfT | 0.395866 | 0.20231   | -0.36409  |
| betT | 1.560445 | 0.719153  | -1.562063 |
| fliY | 0.42185  | 0.212704  | -0.481533 |
| rffD | 1.411849 | 0.912519  | -1.774132 |
| csgB | 0.645804 | 0.500813  | -0.972102 |
| ykgJ | 1.04995  | 0.65639   | -1.517656 |
| pepE | 0.755974 | 0.409325  | -0.205054 |
| msyB | 0.676736 | 0.42403   | -0.145997 |
| garR | 1.976378 | 0.593733  | -0.696052 |
| yheS | 0.840177 | 0.214737  | -0.300136 |
| ykiB | 1.186995 | 0.364206  | -0.475263 |
| ykgN | 2.320009 | 0.743268  | -0.991311 |
| glnP | 0.185262 | 0.094046  | -0.076762 |
| ygjF | 1.221438 | 0.575899  | -0.463853 |
| afuB | 2.492073 | 1.185172  | -0.870178 |

|      |          |           |           |
|------|----------|-----------|-----------|
| ykfH | 2.518912 | 0.981401  | -0.941542 |
| yedI | 0.753969 | 0.31046   | -0.562241 |
| iscU | 0.998832 | 0.368211  | -0.809257 |
| yjcP | 1.345454 | 0.372974  | -0.951357 |
| yagR | 1.096187 | 0.355925  | -0.740155 |
| asnC | 0.881481 | 0.40206   | -0.536327 |
| puuD | 0.498026 | 0.185177  | -0.298058 |
| atoC | 1.178633 | 0.730576  | -0.717588 |
| lldR | 1.119095 | 0.803272  | -0.707285 |
| ligB | 1.116496 | 0.597561  | -0.77157  |
| gntP | 1.05372  | 0.509312  | -0.74886  |
| pepQ | 0.786906 | 0.502828  | -0.578771 |
| intF | 2.581654 | 1.712998  | -1.904943 |
| ybdL | 0.493208 | 0.288158  | -0.35971  |
| mhpF | 1.198332 | 0.723563  | -0.821363 |
| yeiJ | 0.732345 | 0.626176  | -0.56979  |
| katE | 0.308383 | 0.211604  | -0.148457 |
| yafO | 1.257704 | 0.92604   | -0.583128 |
| yagL | 3.469591 | 2.619763  | -1.811727 |
| uspA | 1.599352 | -0.676147 | -0.73435  |
| deoA | 1.083259 | -0.497664 | -0.505907 |
| ygjM | 1.021471 | -0.595873 | -0.555862 |
| mltD | 1.389199 | -0.716903 | -0.691983 |
| yggX | 1.803763 | -1.001876 | -0.596452 |
| thiC | 0.444576 | -0.236733 | -0.180568 |
| arsB | 1.206583 | -0.672317 | -0.490839 |
| ybbW | 0.401897 | -0.150142 | -0.384532 |
| frsA | 1.222244 | -0.403247 | -1.091719 |
| yfiQ | 1.932254 | -0.979829 | -1.979334 |
| ydjA | 0.479024 | -0.274091 | -0.422272 |
| malY | 0.372101 | -0.184528 | -0.33175  |
| ampG | 0.587906 | -0.273374 | -0.516071 |
| dedD | 0.711736 | -0.419476 | -0.503699 |
| kil  | 0.261809 | -0.140612 | -0.158542 |
| lsrF | 0.365166 | -0.169334 | -0.250318 |
| sstT | 1.265065 | -0.688886 | -0.962362 |
| minD | 3.103238 | -1.554324 | -2.333568 |
| barA | 1.305405 | -0.908646 | -1.068664 |
| actP | 1.41251  | -0.964955 | -1.138846 |
| rfaL | 0.363593 | -0.138776 | -0.253709 |
| fhIA | 0.652413 | -0.189241 | -0.356906 |
| nanA | 0.783235 | -0.222604 | -0.498613 |
| yojI | 0.750668 | -0.712932 | -0.320713 |
| rng  | 2.257408 | -2.147248 | -1.191809 |
| yidG | 0.508373 | -0.368962 | -0.186951 |
| yghR | 0.429802 | -0.329607 | -0.172477 |
| ytfK | 0.893593 | -1.09792  | -0.626462 |
| cheA | 1.061945 | -1.259454 | -0.671821 |
| ytfL | 0.290997 | -0.314522 | -0.209957 |
| xerC | 1.929861 | -2.091913 | -1.422885 |
| ybgQ | 0.466247 | -0.532432 | -0.335685 |
| ydiZ | 0.932154 | -1.153903 | -0.716867 |
| xdhA | 0.878241 | -1.09026  | -0.735008 |
| ybdB | 0.462512 | -0.471171 | -0.356523 |
| yagH | 0.704981 | -0.647513 | -0.514332 |
| ynjI | 0.490958 | -0.456579 | -0.4283   |
| racC | 0.852581 | -1.054413 | -0.273166 |
| yijO | 0.99435  | -1.271441 | -0.245442 |
| viaA | 0.814383 | -0.850859 | -0.213788 |
| qseB | 0.634675 | -0.986016 | -0.261394 |
| dinF | 0.36606  | -0.485153 | -0.160811 |

|      |           |           |           |
|------|-----------|-----------|-----------|
| gidB | 2.166116  | -3.314547 | -1.922501 |
| yijF | 0.68749   | -1.028479 | -0.527744 |
| ygfM | 1.823583  | -2.924319 | -1.398575 |
| ytjC | 0.992857  | -2.126497 | -1.048847 |
| ylaB | 0.812031  | -1.969744 | -0.92599  |
| glcC | 1.191851  | -2.319165 | -1.294952 |
| radA | 1.096098  | -1.073524 | -1.333107 |
| eutB | 0.712711  | -0.562883 | -0.801877 |
| yhbX | 0.250347  | -0.26498  | -0.409156 |
| dipZ | 0.955839  | -1.056853 | -1.584682 |
| ygbA | 0.684031  | -0.692903 | -1.008282 |
| yieM | 1.730446  | -1.340798 | -2.394985 |
| hofQ | 1.60532   | -1.310786 | -2.339777 |
| glnE | 1.206013  | -0.911859 | -1.890398 |
| greB | 0.103676  | -0.283015 | -0.178955 |
| yfjH | 0.925151  | -2.059999 | -1.376602 |
| rfaH | 1.73606   | -3.532451 | -2.631359 |
| yedJ | 0.306082  | -0.589674 | -0.444908 |
| yhbW | 0.623475  | -1.292154 | -1.036534 |
| glgC | 0.594246  | -1.501985 | -1.20001  |
| trmH | 0.74374   | -1.832608 | -1.518914 |
| mdbB | 0.106721  | -0.12321  | -0.116734 |
| fdhF | 0.480968  | -0.551253 | -0.524663 |
| yhhJ | 1.520227  | -1.540157 | -1.616063 |
| sodB | 0.591658  | -0.684601 | -0.738632 |
| narY | 0.522658  | -0.824516 | -0.586299 |
| ybjL | 0.840952  | -1.249115 | -1.093164 |
| ybjR | 1.102168  | -1.614459 | -1.481289 |
| yfjZ | 0.8746    | -1.149547 | -1.024544 |
| ygiQ | 0.440181  | -0.597361 | -0.721932 |
| yqaD | 1.014144  | -1.473812 | -1.7295   |
| bioC | 0.836574  | -1.082832 | -1.20985  |
| viaG | 0.837233  | -1.440009 | -1.491872 |
| fecC | 0.790919  | -1.34123  | -1.467421 |
| hha  | 0.994215  | -1.719563 | -1.696436 |
| yqcB | 1.05026   | -1.937064 | -1.882767 |
| rbsR | 1.027614  | -1.685425 | -1.648295 |
| tauA | 1.063368  | -2.102553 | -1.920168 |
| yicG | 0.372888  | -0.727583 | -1.01131  |
| yqeK | 0.879882  | -1.871072 | -2.589974 |
| puuA | 0.655109  | -1.452565 | -1.967095 |
| ugd  | 0.256047  | -0.379686 | -0.556109 |
| nikR | 0.498682  | -0.729029 | -1.076623 |
| yrhB | 0.532844  | -0.794524 | -1.3058   |
| hyaC | 0.444366  | -0.729025 | -1.127433 |
| mutS | 0.769726  | -1.25637  | -1.59012  |
| deoD | 0.72076   | -1.046539 | -1.403657 |
| yhhW | 0.866224  | -1.557253 | -2.049068 |
| yhiN | 1.415988  | -2.531559 | -2.936393 |
| nikC | 1.790399  | -3.106715 | -3.70981  |
| yjiO | 0.811626  | -1.538972 | -1.695586 |
| mgtA | 0.27088   | -0.671724 | -0.779458 |
| ygcR | 0.747094  | -1.985678 | -2.391432 |
| yfiP | 0.907263  | -2.626085 | -2.934924 |
| yfdF | 0.078612  | -0.219167 | -0.248235 |
| cspA | 1.07182   | -3.143398 | -3.410528 |
| yaiP | 0.435561  | -1.175715 | -1.176273 |
| hrpA | 0.113848  | -2.511684 | 0.130253  |
| hyfl | 0.029164  | -0.376872 | 0.012482  |
| nikA | -0.000986 | -0.67094  | 0.056467  |
| idnR | -0.071919 | -1.835423 | 0.056453  |

|      |           |            |           |
|------|-----------|------------|-----------|
| caiC | 0.014906  | -2.171616  | 0.028312  |
| yrbG | 0.965352  | -6.474004  | -0.158433 |
| mglC | 0.105614  | -0.98243   | 0.000907  |
| nanR | 0.150273  | -1.640055  | 0.429825  |
| recO | 0.250778  | -5.107595  | 0.998659  |
| alkA | 0.583126  | -7.549303  | 1.085856  |
| recT | 0.749163  | -5.347082  | 0.580511  |
| sgbU | 0.700583  | -5.82493   | 0.570671  |
| tas  | 0.124492  | -0.820736  | 0.107615  |
| yccZ | -0.059899 | -0.605337  | 0.183784  |
| hdfR | -0.11292  | -2.667873  | 0.562027  |
| macA | -0.007281 | -2.680475  | 0.656971  |
| hinT | -0.009205 | -1.398897  | 0.373623  |
| cspE | -0.020467 | -2.225642  | 0.575959  |
| ynjA | -0.5279   | -3.061263  | 0.53886   |
| xdhB | -0.267826 | -2.656131  | 0.526301  |
| holC | -0.042189 | -6.273183  | -1.158985 |
| potB | -0.281216 | -3.92256   | -0.96478  |
| recE | -0.034553 | -3.053009  | -0.711345 |
| uxuA | -0.050425 | -1.570227  | -0.379748 |
| ygeX | -0.059062 | -2.208217  | -0.522509 |
| baeS | -0.053725 | -5.602069  | -1.644624 |
| vacJ | -0.020184 | -15.386559 | -4.428018 |
| hcaF | -0.010535 | -2.379251  | -0.657625 |
| frlR | -0.131383 | -1.192796  | -0.355925 |
| nlpB | -0.260118 | -2.575863  | -0.795768 |
| yeiU | -0.304448 | -4.070959  | -1.359447 |
| yaY  | -0.192675 | -2.095952  | -0.319385 |
| potA | -0.2256   | -2.371393  | -0.376261 |
| yfeZ | -0.219361 | -2.141347  | -0.340249 |
| ydiD | -0.169775 | -1.139697  | -0.162192 |
| yfhH | -0.293949 | -1.587961  | -0.25842  |
| ydfW | -0.298402 | -1.825403  | -0.321773 |
| dinJ | -1.211147 | -10.163123 | -0.783339 |
| xylE | -0.078809 | -0.552668  | -0.049097 |
| yrbB | -0.18143  | -14.12006  | -0.424237 |
| ydaV | 0.005002  | -0.357714  | -0.023218 |
| yrbC | -0.673019 | -13.913812 | -1.644272 |
| acrE | -0.171401 | -7.580551  | -0.724985 |
| rfaG | 2.106557  | -3.891163  | -0.370508 |
| rfaC | 0.318948  | -0.608271  | -0.115185 |
| ylj  | 0.445307  | -0.916219  | -0.247303 |
| yhjR | 0.632     | -1.2036    | -0.332156 |
| yciW | 0.417715  | -1.304089  | -0.239965 |
| eutI | 0.179159  | -0.462182  | -0.0722   |
| hslU | 0.963132  | -3.030667  | -0.204334 |
| yghQ | 0.552045  | -1.543761  | -0.004646 |
| speF | 0.326934  | -0.987082  | -0.352471 |
| pitB | 0.16388   | -0.54911   | -0.187111 |
| yjiT | 0.297189  | -0.806833  | -0.267855 |
| yphA | 0.78979   | -2.066122  | -0.695949 |
| ptsP | 1.870829  | -8.438247  | -2.884498 |
| eutL | 0.20949   | -1.18551   | -0.321329 |
| ugpB | 0.311698  | -1.814737  | -0.503707 |
| tauC | 0.400603  | -1.924737  | -0.563078 |
| recG | 1.392877  | -6.783041  | -1.539643 |
| yhjE | 0.353755  | -1.466567  | -0.370579 |
| rfaY | 0.867548  | -3.529095  | -0.923673 |
| ydfC | 0.745553  | -3.348343  | -0.28509  |
| npr  | 1.35932   | -5.642649  | -0.577986 |
| ssnA | 0.230603  | -0.93542   | -0.110889 |

|      |           |            |            |
|------|-----------|------------|------------|
| ygcl | 0.409575  | -1.820799  | -0.33589   |
| yrbF | 1.227419  | -10.927945 | -1.03972   |
| yggL | 0.030391  | -0.180652  | -0.014153  |
| ygcf | 0.177318  | -1.186524  | -0.172252  |
| rfaQ | 1.757432  | -20.096552 | -3.176974  |
| yhhZ | 0.147601  | -1.876263  | -0.317439  |
| yrbD | 1.377828  | -16.152401 | -2.055118  |
| ybjX | 0.434233  | -7.175174  | -1.020814  |
| recF | 0.080406  | -1.812338  | -0.391935  |
| cusR | 0.145492  | -1.776438  | -0.410061  |
| yhhF | 0.517674  | -4.688965  | -1.07927   |
| rhaA | 0.028152  | -0.49373   | -0.422237  |
| smpB | 0.078071  | -0.832875  | -0.730397  |
| srlA | 0.121651  | -1.08846   | -0.938388  |
| yphC | 0.080836  | -0.775274  | -0.674433  |
| yjhQ | 0.219489  | -2.151917  | -1.86721   |
| rhaR | 0.165667  | -1.366352  | -1.196283  |
| ygcl | 0.226281  | -1.957913  | -1.784015  |
| yaC  | 0.077339  | -0.408396  | -0.398205  |
| uxaA | 0.325484  | -1.778981  | -1.68416   |
| cvrA | 0.25408   | -1.571983  | -1.43211   |
| xylB | 0.324306  | -2.318708  | -1.792123  |
| soxS | 0.357529  | -2.30265   | -1.719386  |
| yjhP | 0.320151  | -1.524964  | -1.082335  |
| dedA | 0.548642  | -2.440121  | -1.738421  |
| yfcX | 1.092979  | -3.576601  | -2.704566  |
| setC | 0.385358  | -1.338877  | -0.970879  |
| paaF | 0.171855  | -0.533003  | -0.45124   |
| ydfD | 0.315453  | -1.145235  | -0.99578   |
| hybD | 0.542556  | -2.077356  | -1.683203  |
| yghS | 0.46933   | -1.85344   | -1.480551  |
| mdtE | -0.006986 | -3.593733  | -3.397502  |
| qseC | -0.079884 | -1.927127  | -1.957623  |
| glcE | 0.029666  | -0.94139   | -1.00619   |
| yiiG | -0.000642 | -1.322555  | -1.430672  |
| sbp  | -0.32556  | -2.109397  | -2.153799  |
| ygaT | -0.27749  | -2.022406  | -2.05116   |
| yphB | -0.114096 | -0.772916  | -0.848993  |
| yeiP | -0.240924 | -1.89907   | -2.040935  |
| dppA | -0.178586 | -1.955066  | -2.058194  |
| rtcB | -0.048673 | -0.515934  | -0.478872  |
| bglH | -0.061123 | -0.728679  | -0.700489  |
| hokD | -0.147756 | -1.17041   | -1.091171  |
| yhdJ | 0.009072  | -1.327799  | -1.118137  |
| proQ | -0.031404 | -4.016513  | -3.542795  |
| ydhM | -0.009259 | -1.30345   | -1.122911  |
| yjjB | -0.042669 | -1.428852  | -1.259424  |
| pqqL | -0.09552  | -1.391463  | -1.150498  |
| ybbB | -0.363398 | -4.473125  | -3.586987  |
| yfgG | -0.03308  | -0.482323  | -0.414706  |
| oppD | -0.063343 | -1.214435  | -1.044737  |
| acrA | -0.823914 | -12.421183 | -10.956497 |
| yrbL | 0.410259  | -2.70774   | -1.301693  |
| hcp  | 0.216585  | -1.163407  | -0.570627  |
| gss  | 0.219548  | -1.319651  | -0.571439  |
| tag  | 0.69746   | -2.088741  | -0.93612   |
| gutM | 0.11079   | -0.446626  | -0.220513  |
| ymcA | 0.774604  | -3.078096  | -1.408573  |
| recB | 2.459587  | -8.244472  | -4.269249  |
| yihV | 0.379623  | -1.244672  | -0.629985  |
| rbn  | 0.367771  | -1.317354  | -0.710008  |



|      |           |            |           |
|------|-----------|------------|-----------|
| kdsD | 0.575507  | -2.142894  | -1.246558 |
| nagA | 0.851806  | -3.188562  | -1.795536 |
| hsrA | 0.641805  | -2.97257   | -1.679817 |
| mhpB | 0.080252  | -0.330737  | -0.209518 |
| yphD | 0.468801  | -1.89172   | -1.204766 |
| yeiA | 0.245807  | -1.013762  | -0.627199 |
| phoQ | 0.360962  | -8.131056  | -3.218932 |
| exuT | 0.112477  | -1.962078  | -0.571228 |
| rfal | 0.242     | -4.893647  | -1.577103 |
| ygcS | 0.164928  | -2.509183  | -0.848487 |
| ygeY | 0.175722  | -1.600452  | -0.548343 |
| phoP | 1.106376  | -7.633856  | -2.856    |
| tig  | 0.885002  | -6.769031  | -2.471239 |
| eutH | 0.217353  | -2.004054  | -0.780463 |
| ydcQ | -0.808062 | -7.908676  | -3.896591 |
| ydfQ | -0.114477 | -1.568868  | -0.83943  |
| rffG | 0.072099  | -1.104741  | -0.491767 |
| recJ | 0.269661  | -4.366286  | -2.139114 |
| asmA | 0.127621  | -3.130308  | -1.480215 |
| thiS | 0.039677  | -3.507919  | -1.705392 |
| yahA | 0.017428  | -2.109618  | -0.983594 |
| ybiB | 0.017221  | -1.078436  | -0.546214 |
| ydfV | -0.011982 | -5.293201  | -2.333761 |
| ybhT | -0.019767 | -9.320434  | -4.247045 |
| ymgE | -0.016269 | -0.600517  | -0.24573  |
| kdpD | -0.076923 | -11.417971 | -4.715511 |
| narQ | -0.827246 | -12.597213 | -5.464064 |
| yfhA | -0.13744  | -2.281768  | -1.021672 |
| dmsC | -0.212811 | -3.307081  | -1.533037 |
| purR | -0.231023 | -5.38534   | -2.538288 |
| acrB | -0.681839 | -27.450932 | -13.44226 |
| yifN | 0.065191  | -1.077161  | -0.697303 |
| bolA | 0.081749  | -2.097691  | -1.447747 |
| rseB | 0.025674  | -8.858279  | -6.15423  |
| nirC | 0.177672  | -2.925463  | -2.166295 |
| vsr  | 0.109285  | -0.975211  | -0.567479 |
| hybF | 0.169947  | -1.254797  | -0.823943 |
| yeeR | 0.161381  | -1.154687  | -0.747116 |
| nudC | 0.653771  | -5.285899  | -3.305315 |
| yhiL | 0.386608  | -3.689576  | -2.29838  |
| rpoZ | 0.063873  | -9.192273  | -5.393381 |
| yqfE | 0.109236  | -1.619155  | -0.928327 |
| livM | 0.145571  | -2.054767  | -1.194649 |
| eutE | 0.099917  | -1.849104  | -1.074605 |
| ycdB | 0.102308  | -3.009436  | -1.645079 |
| ycfL | -0.067612 | -1.946919  | -1.19803  |
| ybiH | -0.051333 | -2.335367  | -1.483674 |
| yhcN | -0.080954 | -1.198269  | -0.730037 |
| glnB | -0.202255 | -3.31483   | -2.093521 |
| lrp  | -0.360582 | -3.292813  | -2.325522 |
| yejG | -0.092229 | -0.960956  | -0.65357  |
| yfiC | -0.361241 | -2.747479  | -1.843935 |
| yddB | -0.033695 | -0.191883  | -0.051572 |
| ycfR | -0.608251 | -2.818597  | -0.770853 |
| yjjJ | -0.645257 | -1.940817  | -0.760958 |
| cpdA | -1.279371 | -4.067515  | -1.265423 |
| ddpA | -0.477696 | -1.711176  | -0.796213 |
| yhhY | -0.689984 | -1.99593   | -1.047759 |
| hlpA | -2.444568 | -7.745214  | -4.068846 |
| yecP | -1.217266 | -4.054689  | -2.079054 |
| marA | -0.912195 | -4.046488  | -1.614117 |

|      |           |            |           |
|------|-----------|------------|-----------|
| ycaM | -0.11936  | -0.486401  | -0.203283 |
| ygaW | -0.235592 | -1.344749  | -0.610722 |
| yfeC | -0.471619 | -2.767041  | -1.248383 |
| fadL | -0.193496 | -1.095229  | -0.507774 |
| gcvP | -0.237253 | -1.205328  | -0.550388 |
| hyfA | -0.153353 | -0.886522  | -0.454031 |
| yfjW | -0.244015 | -1.44258   | -0.714641 |
| rluA | -0.25484  | -1.290519  | -0.688663 |
| ydfZ | -0.708543 | -2.297905  | -1.699626 |
| sspA | -3.994271 | -12.062497 | -8.967121 |
| yeaB | -0.255852 | -1.009627  | -0.670116 |
| rraA | -0.605596 | -2.667895  | -1.795464 |
| holE | -0.402097 | -1.627827  | -1.167603 |
| ybdJ | -0.261489 | -0.909878  | -0.598608 |
| yaeP | -0.267837 | -0.71104   | -0.473733 |
| ygfl | -0.590681 | -1.675695  | -1.066919 |
| wzxC | -0.212841 | -0.629497  | -0.65362  |
| dsdA | -1.296127 | -4.695814  | -4.674784 |
| yncA | -0.833062 | -2.206174  | -2.0864   |
| yehB | -0.485363 | -1.413632  | -1.337417 |
| ydcN | -0.854598 | -2.003857  | -1.949801 |
| nfsA | -0.854175 | -2.594592  | -2.148522 |
| fhuF | -0.373624 | -1.240734  | -1.089406 |
| ydjX | -0.282307 | -0.9607    | -0.828118 |
| xylA | -0.262046 | -0.679645  | -0.552547 |
| xapR | -0.441493 | -1.084035  | -0.908556 |
| yqgA | -0.422141 | -2.02779   | -1.743613 |
| yciQ | -0.282392 | -1.322022  | -1.065438 |
| osmY | -1.436502 | -2.47864   | -1.276877 |
| mrcA | -1.569751 | -2.87309   | -1.202684 |
| ycaQ | -0.465889 | -0.820875  | -0.347044 |
| ycfN | -0.439569 | -0.89374   | -0.292156 |
| ycfZ | -0.571809 | -1.239986  | -0.615073 |
| yncG | -0.630049 | -1.281546  | -0.697968 |
| potH | -0.432901 | -1.129939  | -0.597356 |
| yhdL | -0.560808 | -1.423784  | -0.729684 |
| dmsA | -0.537857 | -1.317076  | -0.6764   |
| yaal | -0.617644 | -1.472986  | -0.664724 |
| mpl  | -1.432627 | -3.282587  | -2.022247 |
| fimE | -4.121028 | -8.823529  | -5.652249 |
| yfdV | -0.208278 | -0.491499  | -0.273956 |
| intE | -0.726655 | -1.610856  | -0.921809 |
| emtA | -0.941235 | -1.986256  | -1.188757 |
| osmB | -0.595125 | -1.214076  | -0.714163 |
| ybhN | -0.377959 | -0.658639  | -0.426791 |
| ptsG | -1.882918 | -3.226834  | -2.325563 |
| csiE | -0.996902 | -1.531801  | -0.935662 |
| ygiW | -1.258594 | -1.898197  | -1.341482 |
| trpD | -0.879656 | -1.366676  | -0.917362 |
| ybjT | -1.761054 | -2.771139  | -2.263787 |
| yqcA | -1.284123 | -2.392725  | -1.854396 |
| yceG | -1.108892 | -2.050081  | -1.60644  |
| pepN | -1.118278 | -1.979554  | -1.562545 |
| yhaH | -0.683607 | 0.30404    | -1.594695 |
| atoB | -0.998876 | 0.308741   | -2.377736 |
| yadD | -1.237721 | 0.428177   | -2.882474 |
| yhfX | -0.555831 | 0.209163   | -1.376175 |
| ygfF | -0.935501 | 0.398545   | -2.938112 |
| ycbU | -0.59243  | 0.121744   | -0.855059 |
| rdgC | -0.546215 | 0.159718   | -0.855315 |
| yehR | -0.510131 | 0.181378   | -0.789687 |

|      |           |           |           |
|------|-----------|-----------|-----------|
| sbcD | -0.13166  | 0.035412  | -0.229514 |
| gmd  | -0.898617 | 0.180703  | -1.510787 |
| yebF | -0.321962 | 0.116915  | -0.600063 |
| rscF | -1.004295 | 0.321404  | -2.035445 |
| ydaL | -0.499178 | -0.157551 | -1.70424  |
| ydcC | -0.855789 | -0.197619 | -2.767987 |
| artQ | -0.589113 | -0.133398 | -1.735327 |
| agp  | -0.353408 | -0.024409 | -0.987665 |
| paaB | -0.649787 | -0.033935 | -2.018917 |
| yfcH | -1.035084 | 0.081433  | -2.406082 |
| thiP | -1.039313 | 0.03905   | -2.381937 |
| hcaC | -1.464836 | -0.028335 | -3.280667 |
| ymfL | -0.417188 | -0.089156 | -0.506019 |
| mraW | -4.902288 | -1.363308 | -7.036823 |
| nth  | -0.752093 | -0.147344 | -1.135546 |
| tdh  | -0.658648 | 0.009084  | -0.961822 |
| yahG | -0.929686 | -0.06348  | -1.323108 |
| yehM | -1.117527 | -0.055341 | -1.622    |
| ndh  | -1.745657 | -0.198534 | -2.367908 |
| codA | -1.081606 | -0.07025  | -1.420757 |
| ydgH | -1.454783 | -0.629357 | -2.194256 |
| yfaY | -0.663401 | -0.264611 | -0.965546 |
| ydeM | -0.764653 | -0.299263 | -1.258412 |
| fadD | -1.331965 | -0.465046 | -2.219798 |
| yjgJ | -0.830636 | -0.390655 | -1.441676 |
| yneJ | -0.856562 | -0.408254 | -1.450657 |
| csgE | -1.171392 | -0.574098 | -1.983469 |
| ydaS | -0.924535 | -0.448123 | -1.66453  |
| kdpB | -0.95463  | -0.573188 | -1.395788 |
| yehE | -2.482884 | -1.555022 | -4.225431 |
| rof  | -0.873796 | -0.466194 | -1.436694 |
| yliE | -1.306748 | -0.495904 | -2.557037 |
| citG | -1.131501 | -0.524427 | -2.323459 |
| citA | -0.564409 | -0.123099 | -1.055997 |
| yfhG | -1.095478 | -0.313456 | -2.051838 |
| ycil | -0.594438 | -0.08177  | -1.089211 |
| yfeG | -0.682838 | -0.613928 | -2.584519 |
| yfbE | -0.383993 | -0.354667 | -1.456317 |
| yihR | -0.499876 | -0.402881 | -1.809584 |
| yecN | -0.359192 | -0.245099 | -1.289692 |
| hyfC | -0.72738  | -0.488783 | -2.627547 |
| fecl | -0.796378 | -0.573946 | -2.914885 |
| hcr  | -1.505221 | -2.008627 | -7.365063 |
| yceD | -0.246978 | -0.27254  | -1.049286 |
| dctA | -0.604889 | -0.686254 | -2.677674 |
| yjhB | -0.386912 | -0.424668 | -1.575771 |
| ydfE | -0.193926 | -0.196821 | -0.77685  |
| yciK | -1.070385 | -1.143449 | -4.105048 |
| setB | -0.621281 | -0.822678 | -2.716962 |
| ydfU | -0.498453 | -0.608503 | -2.044205 |
| ygcG | -1.03085  | -0.923344 | -3.014898 |
| sdaB | -0.382074 | -0.393461 | -1.299978 |
| ydaO | -0.368288 | -0.359365 | -1.203961 |
| thiM | -0.584604 | -0.519207 | -1.955471 |
| glgA | -0.417642 | -0.75676  | -1.806738 |
| ansP | -0.525483 | -0.839052 | -2.036008 |
| ygbN | -0.880743 | -1.446316 | -3.746338 |
| ydcW | -0.704248 | -0.944187 | -2.586943 |
| hemF | -0.588767 | -0.750933 | -2.157317 |
| yeal | -0.55721  | -0.806946 | -2.231889 |
| nfrB | -0.439623 | -0.628158 | -1.766622 |

|      |           |           |           |
|------|-----------|-----------|-----------|
| ynfO | -0.410756 | -0.499337 | -1.375249 |
| yifO | -0.287825 | -0.153217 | -0.727904 |
| ybcW | -0.406797 | -0.206543 | -1.037389 |
| yobA | -0.188466 | -0.093535 | -0.485916 |
| yadC | -0.493927 | -0.292022 | -1.334871 |
| ynfL | -0.823542 | -0.483917 | -2.192885 |
| yahD | -1.955595 | -1.21976  | -5.100254 |
| sufC | -1.458688 | -0.939889 | -3.777797 |
| speE | -0.756627 | -0.532832 | -2.124388 |
| yffB | -0.271343 | -0.185815 | -0.767162 |
| ygbK | -0.480946 | -0.315642 | -1.437605 |
| ytfA | -0.330604 | -0.153778 | -0.938935 |
| yfdO | -1.601163 | -0.744381 | -4.725389 |
| rspB | -0.544489 | -0.282613 | -1.691946 |
| entA | -0.882872 | -0.327612 | -2.711454 |
| ydhQ | -0.846677 | -0.21864  | -2.24292  |
| ymfA | -0.636122 | -0.243072 | -1.577945 |
| yjeS | -0.336007 | -0.1894   | -0.706861 |
| ynjH | -1.036742 | -0.594047 | -2.1648   |
| ytfE | -0.796776 | -0.475834 | -1.735249 |
| lit  | -0.937867 | -0.665046 | -2.256523 |
| yejE | -0.76571  | -0.575187 | -1.732102 |
| ybfO | -1.540276 | -1.189974 | -3.275553 |
| yohN | -0.216847 | -0.13892  | -0.423184 |
| cobT | -1.300471 | -1.590115 | -3.840886 |
| hisH | -1.849975 | -2.08646  | -5.124079 |
| ybfD | -1.312062 | -1.525329 | -3.636057 |
| icdC | -0.353189 | -0.363361 | -0.883509 |
| prpD | -2.567608 | -2.582126 | -6.521262 |
| chaA | -0.407292 | -0.39129  | -0.984868 |
| yeaL | -0.72797  | -0.753401 | -1.624589 |
| ydeH | -2.580129 | -2.423772 | -5.721004 |
| sufE | -1.03104  | -0.984015 | -2.250119 |
| yeeY | -0.425388 | -0.394711 | -0.397734 |
| yfeU | -0.923471 | -0.873114 | -0.80255  |
| moaA | -1.862684 | -1.967495 | -1.937874 |
| oppC | -0.548901 | -0.58247  | -0.557836 |
| yecG | -0.818813 | -0.91286  | -0.914582 |
| ydjN | -0.423023 | -0.493841 | -0.420539 |
| paaA | -0.43236  | -0.399893 | -0.51359  |
| yhcC | -0.588956 | -0.572925 | -0.719785 |
| acnA | -0.847599 | -0.835776 | -0.945913 |
| ybgl | -0.532141 | -0.49457  | -0.574321 |
| ydeA | -0.522276 | -0.547846 | -0.725534 |
| yecJ | -1.17393  | -1.218211 | -1.570432 |
| ydjM | -0.63321  | -0.82855  | -0.769089 |
| ygaV | -1.196301 | -1.562423 | -1.622589 |
| yrfC | -0.595739 | -0.792409 | -0.779861 |
| ybjQ | -0.916182 | -1.384947 | -1.34584  |
| yciC | -0.725464 | -0.999727 | -1.07963  |
| ymjA | -1.077003 | -0.817214 | -0.979291 |
| pphB | -1.030679 | -0.806106 | -0.962496 |
| ygcQ | -0.822069 | -0.57939  | -0.724722 |
| rna  | -2.292479 | -1.518795 | -2.204312 |
| yncC | -0.139202 | -0.09287  | -0.140241 |
| ycjF | -0.676961 | -0.515927 | -0.72881  |
| gcd  | -0.495541 | -0.414849 | -0.517679 |
| yqjK | -1.122531 | -0.691669 | -1.310615 |
| yaiC | -0.473334 | -0.351898 | -0.597244 |
| yhaB | -0.464592 | -0.209195 | -0.555636 |
| rnhA | -1.488266 | -0.694962 | -1.849969 |

|      |           |           |           |
|------|-----------|-----------|-----------|
| ycdG | -1.026383 | -0.498281 | -1.234516 |
| ygeL | -0.318899 | -0.317359 | -0.617139 |
| glk  | -3.025319 | -3.099183 | -6.093192 |
| yecT | -1.267259 | -1.409611 | -2.438869 |
| yceH | -1.40472  | -1.037106 | -2.382267 |
| ycgL | -1.209338 | -0.93756  | -2.030946 |
| nlpl | -2.002614 | -1.715961 | -3.287056 |
| yfiK | -1.417011 | -1.123624 | -2.226201 |
| cysW | -1.399442 | -1.321713 | -2.143543 |
| ykfB | -0.797238 | -0.729753 | -1.204443 |
| ycfX | -1.734612 | -1.593354 | -2.597834 |
| torA | -0.616267 | -0.524235 | -0.937332 |
| rstA | -0.108944 | -0.166494 | -0.262686 |
| fumB | -0.358659 | -0.630259 | -0.983132 |
| dusB | -0.73854  | -1.277454 | -1.97175  |
| aqpZ | -0.820012 | -1.415528 | -2.32073  |
| yfdM | -0.695825 | -1.100891 | -1.805189 |
| clpS | -0.597299 | -0.960472 | -1.372815 |
| ddpB | -0.419574 | -0.741229 | -1.063436 |
| yehL | -0.805587 | -1.385059 | -1.936473 |
| ybbO | -1.490344 | -2.503394 | -3.731198 |
| ydiV | -0.934072 | -1.650619 | -3.109692 |
| ycbS | -1.173546 | -1.799016 | -3.539916 |
| idnO | -0.248699 | -0.396317 | -0.748266 |
| argO | -0.377086 | -0.700902 | -1.179416 |
| evgA | -0.589817 | -1.082806 | -1.875814 |
| yciO | -0.616485 | -1.163704 | -1.992512 |
| yoeA | -0.82156  | -1.381731 | -2.46554  |
| yeaA | -0.83956  | -1.404822 | -2.541274 |
| focB | -0.601328 | -0.774861 | -1.396305 |
| paaH | -0.551914 | -0.707856 | -1.294938 |
| ybcY | -1.09172  | -1.594872 | -2.937669 |
| yfgO | -0.852725 | -1.081855 | -2.189572 |
| gnd  | -0.89993  | -1.204414 | -2.551796 |
| mltC | -0.884658 | -1.578458 | -1.65334  |
| tehA | -0.448005 | -0.90171  | -0.920653 |
| yddH | -0.898217 | -1.746138 | -1.740495 |
| yggG | -0.347182 | -0.568485 | -0.652566 |
| wcaJ | -1.024688 | -1.760404 | -2.020851 |
| yeaG | -0.58442  | -0.82861  | -1.008356 |
| mgsA | -0.73035  | -1.091863 | -1.257899 |
| yabP | -1.048121 | -1.624304 | -2.08935  |
| yqjC | -0.360664 | -0.589083 | -0.726386 |
| ybaL | -0.628675 | -0.964951 | -1.330701 |
| yfcQ | -1.194932 | -1.909122 | -2.544009 |
| ygcU | -1.387651 | -2.17509  | -2.907526 |
| fdnI | -0.43713  | -0.812281 | -0.959433 |
| yeaE | -0.866083 | -1.538976 | -1.908674 |
| nanE | -0.474336 | -0.837173 | -1.044369 |
| csgF | -0.560185 | -1.133793 | -1.339968 |
| ddlA | -0.524881 | -0.994621 | -1.293338 |
| yjhH | -0.724543 | -0.888573 | -1.20073  |
| kbaZ | -1.967883 | -2.538933 | -3.307613 |
| cbpM | -0.820612 | -1.009439 | -1.310086 |
| uidC | -0.195103 | -0.64016  | -0.949301 |
| mppA | -0.393245 | -1.162246 | -1.779865 |
| ddlB | -0.427118 | -1.055982 | -1.740444 |
| yedZ | -0.850323 | -2.290705 | -3.809424 |
| ydgl | -0.780739 | -1.948081 | -3.059041 |
| mdtF | -1.436925 | -3.663733 | -5.842197 |
| yeeD | -0.898904 | -2.179926 | -3.245343 |

|      |           |           |           |
|------|-----------|-----------|-----------|
| treF | -0.912971 | -2.271992 | -3.304276 |
| yeiN | -0.36934  | -0.915023 | -1.342291 |
| csiR | -0.966579 | -2.256933 | -3.327285 |
| yfcY | -0.573292 | -1.671731 | -2.018064 |
| ylbH | -0.459909 | -1.658231 | -2.161888 |
| yceB | -0.626412 | -2.093882 | -2.70014  |
| ypfG | -0.558009 | -1.656855 | -2.195813 |
| sseB | -0.7745   | -1.832602 | -2.533579 |
| ansA | -0.423179 | -0.965015 | -1.281543 |
| aat  | -0.869576 | -2.203864 | -2.844737 |
| puuE | -0.610246 | -1.557216 | -2.02288  |
| ycaD | -0.094418 | -0.558487 | -0.796114 |
| livF | -0.24255  | -1.515553 | -2.217383 |
| ycgV | -0.151819 | -0.97396  | -1.475045 |
| hydN | -0.182298 | -0.939818 | -1.41709  |
| uspE | -0.228304 | -1.018771 | -1.500431 |
| yghU | -0.241197 | -1.078221 | -1.535068 |
| yhiD | -0.469335 | -2.051016 | -2.777943 |
| ypdC | -0.779412 | -3.165257 | -4.36556  |
| sulA | -0.307004 | -2.516463 | -3.209021 |
| poxB | -0.174776 | -1.699691 | -2.320062 |
| yfjO | -0.289221 | -2.531898 | -3.378468 |
| cspH | -0.229044 | -2.23476  | -2.991316 |
| tdk  | -0.55434  | -4.380612 | -5.789094 |
| ymfB | -0.468881 | -2.048079 | -2.408694 |
| yhiK | -0.274536 | -1.294391 | -1.506841 |
| ynfA | -0.303091 | -1.426336 | -1.775043 |
| ymcB | -0.080157 | -0.501993 | -0.617995 |
| ompA | -0.433275 | -2.446321 | -2.977071 |
| sohB | -0.261595 | -1.85959  | -2.187784 |
| yjjW | 0.600377  | 0.37296   | -1.718857 |
| ycjR | 0.337842  | 0.194472  | -0.94936  |
| yhfU | 0.220953  | 0.162786  | -0.705015 |
| ymcC | 0.252998  | 0.274454  | -0.762816 |
| ccmF | 0.759822  | 0.768817  | -2.363893 |
| yceK | 0.439918  | 0.540284  | -1.644171 |
| cyoC | 0.387222  | 0.649467  | -3.374055 |
| yhfA | 0.292405  | 0.374109  | -1.781753 |
| aphA | 0.691871  | 0.7277    | -4.179354 |
| ccmG | 0.382859  | 0.349625  | -1.685521 |
| yohF | 0.47518   | 0.256661  | -2.019603 |
| thrC | 1.131171  | 0.812124  | -5.143375 |
| yggS | 0.770244  | 0.537442  | -4.882404 |
| artP | 0.125092  | 0.100548  | -0.93659  |
| zraP | 0.332115  | 0.180613  | -1.718791 |
| pstA | 0.520957  | 0.086334  | -4.052305 |
| ypjF | 0.169858  | 0.012632  | -1.162272 |
| phnD | 0.197323  | 0.0438    | -1.132851 |
| yjiG | 0.443876  | 0.262399  | -3.229245 |
| yfjR | 0.216157  | 0.096376  | -1.656187 |
| dgoD | 0.215118  | 0.143811  | -2.175857 |
| fpr  | 0.589316  | 0.176305  | -1.441231 |
| ygcN | 0.531754  | 0.136178  | -1.219866 |
| torY | 0.326857  | 0.015699  | -1.03084  |
| yajO | 0.6358    | 0.004823  | -1.827225 |
| yeiG | 0.657181  | 0.055389  | -1.78627  |
| xylF | 1.232876  | 0.081959  | -3.377932 |
| yfbL | 1.132794  | 0.244743  | -3.119969 |
| ampD | 1.334004  | 0.31756   | -3.818137 |
| evgS | 1.523254  | 0.261759  | -4.326629 |
| fixX | 0.428638  | 0.125134  | -1.422262 |

|      |           |           |           |
|------|-----------|-----------|-----------|
| ybiX | 0.629561  | 0.239193  | -2.150492 |
| araG | 0.55428   | 0.208379  | -1.655859 |
| bioD | 0.235623  | 0.099803  | -0.724229 |
| eutP | 0.756521  | 0.072957  | -2.762437 |
| ymgB | 0.442829  | -0.017989 | -1.648762 |
| ykfl | 1.326775  | 0.391951  | -5.386184 |
| ygeG | 0.379423  | 0.070302  | -1.681625 |
| torC | -0.194523 | 0.538143  | -2.467538 |
| ybfF | -0.117279 | 0.434284  | -1.898102 |
| cobB | -0.083148 | 0.484529  | -1.917569 |
| dnaB | 0.007978  | 0.161777  | -0.654209 |
| pstS | -0.041175 | 1.223342  | -4.475331 |
| yhjD | 0.175906  | 0.197703  | -2.689287 |
| yhbE | 0.194654  | 0.338901  | -3.199047 |
| frwC | 0.150372  | 0.268479  | -1.697056 |
| phnH | 0.22667   | 0.470461  | -3.149701 |
| ynjF | 0.096431  | 0.34331   | -2.305762 |
| yodA | 0.028414  | 0.519484  | -2.861019 |
| ecpD | 0.08247   | 0.387214  | -2.111766 |
| pdxK | -0.064179 | 0.521919  | -3.277153 |
| eamA | -0.073563 | 0.032155  | -0.34682  |
| ykgK | -0.155273 | 0.058339  | -0.706593 |
| hycB | -0.423158 | 0.196209  | -2.585281 |
| wbbK | -0.183648 | 0.078955  | -1.166269 |
| ybiW | -0.389724 | 0.084622  | -1.551055 |
| yjhC | -0.725271 | 0.029104  | -2.830206 |
| yjgD | -0.257132 | 0.184715  | -2.451659 |
| ydaF | -0.076158 | 0.074393  | -0.896244 |
| mdtC | -0.562145 | 0.48382   | -3.189902 |
| yfdC | -0.387445 | 0.279114  | -2.05928  |
| mtr  | -0.208092 | 0.173523  | -1.359963 |
| ydhD | -0.146416 | 0.157201  | -0.925755 |
| eaeH | -0.163489 | 0.278875  | -1.551353 |
| flgN | -0.04275  | 0.091707  | -0.517669 |
| oppF | -0.248364 | 0.262945  | -2.127747 |
| ybbV | -0.083947 | 0.12029   | -0.840558 |
| rem  | -0.132304 | -0.053713 | -0.72383  |
| prc  | -0.994382 | -0.584111 | -5.571682 |
| yadN | -0.668176 | -0.352628 | -2.965305 |
| feaR | -0.77928  | -0.350389 | -3.100512 |
| yejB | -0.704691 | -0.335697 | -2.670974 |
| sfmC | -0.227423 | -0.061596 | -1.6518   |
| phoE | -0.740901 | -0.27586  | -4.848414 |
| yohD | -0.107503 | -0.00185  | -0.703399 |
| gltS | -0.434622 | 0.024172  | -3.388862 |
| glf  | -0.259222 | 0.006925  | -1.953677 |
| yaiT | -0.4583   | 0.001622  | -2.153275 |
| hpt  | -1.301987 | 0.045625  | -7.018652 |
| yjeJ | -0.432484 | -0.130575 | -1.960034 |
| ydjR | -0.588593 | -0.10832  | -2.802029 |
| fbaB | -0.823764 | -0.13363  | -3.995179 |
| csdA | -0.152399 | -0.149262 | -0.842101 |
| xapB | -0.927544 | -0.858091 | -5.006253 |
| ybcF | -0.154215 | -0.173464 | -0.981922 |
| ypfE | -0.76527  | -0.771326 | -4.698658 |
| trmC | -0.876222 | -0.783122 | -5.181514 |
| yraM | -0.428267 | -0.350018 | -2.777108 |
| eutC | -0.524892 | -0.531217 | -3.651879 |
| sgcX | -0.136333 | -0.173397 | -0.805279 |
| yggF | -0.233284 | -0.262773 | -1.176816 |
| yhdA | -0.53102  | -0.451132 | -2.462726 |

|      |           |           |            |
|------|-----------|-----------|------------|
| cstA | -0.289385 | -0.548923 | -2.444475  |
| ybjE | -0.105634 | -0.189017 | -0.935898  |
| cueO | -0.248581 | -0.457291 | -2.282433  |
| yegW | -0.214455 | -0.38289  | -1.942632  |
| yneL | -0.627158 | -1.002929 | -5.018197  |
| yfgC | -0.147373 | -0.243121 | -1.514983  |
| cspC | -0.423609 | -0.843064 | -4.385835  |
| ivy  | -0.348633 | -0.644656 | -3.541419  |
| yafP | -0.343472 | -0.838257 | -4.42643   |
| ybjJ | -0.343091 | -0.688872 | -2.657778  |
| yafC | -0.289228 | -0.607045 | -2.453165  |
| narX | -0.16985  | -0.379395 | -1.358101  |
| uxuR | -0.331618 | -0.827849 | -2.921155  |
| ybeM | -0.581473 | -1.146509 | -4.201837  |
| appB | -0.049592 | -0.044296 | -0.864071  |
| eutT | -0.25766  | -0.141602 | -2.936787  |
| fiu  | -0.044042 | -0.087159 | -1.688736  |
| nemA | -0.066396 | -0.131796 | -1.714438  |
| xapA | -0.189536 | -0.399847 | -3.308728  |
| flgK | -0.060406 | -0.170399 | -1.185267  |
| ycfS | -0.117053 | -0.459368 | -3.421677  |
| cdaR | -0.199246 | -0.239961 | -2.407272  |
| nlpE | -0.156289 | -0.20582  | -2.117046  |
| fhuA | 0.191329  | -0.072923 | -2.802765  |
| yjeN | 0.30155   | -0.135424 | -3.709118  |
| recA | 0.392391  | 0         | -4.245137  |
| tgt  | 0.774231  | -0.058672 | -7.764998  |
| nlpD | 0.34903   | -0.285827 | -4.157483  |
| ydhU | 0.235125  | -0.155245 | -2.444751  |
| bcsB | 0.055826  | -0.135155 | -2.726328  |
| mtgA | 0.015243  | -0.063773 | -0.628409  |
| pspF | 0.121449  | -0.278018 | -3.47581   |
| ybfQ | 0.168516  | -0.432508 | -6.096817  |
| menB | 0.009638  | -0.146477 | -1.927413  |
| emrE | 0.283719  | -0.236762 | -7.959477  |
| ydcS | 0.073616  | -0.022713 | -1.796375  |
| nrdF | 0.036606  | -0.013681 | -2.783244  |
| rnhB | -0.12216  | 0.106375  | -3.753809  |
| ybeR | -0.028788 | 0.046001  | -1.291443  |
| cls  | -0.153409 | 0.110361  | -3.052643  |
| cspB | -0.15504  | 0.020288  | -4.693884  |
| rumB | -0.030925 | 0.005068  | -2.397595  |
| yqjH | -0.038279 | 0.286135  | -4.219335  |
| ycdR | 0.100894  | 0.375246  | -7.334028  |
| yegT | 0.073426  | 0.30512   | -4.312773  |
| ylcG | 0.646087  | -1.10326  | -10.557167 |
| zupT | 0.18143   | -0.423389 | -2.924683  |
| mdaB | 0.139736  | -0.385812 | -2.434438  |
| arsR | 0.126062  | -0.27955  | -2.14519   |
| kdpA | 0.117159  | -0.369691 | -2.68924   |
| dppC | 0.270295  | -0.288172 | -1.866428  |
| ydcl | 0.231435  | -0.433958 | -2.342461  |
| dkgB | 0.420266  | -0.588388 | -3.420927  |
| maeB | 0.556591  | -0.658413 | -4.990005  |
| garP | 0.243461  | -0.290265 | -2.338885  |
| ybjS | 0.034321  | -0.359857 | -1.590522  |
| ygeF | 0.107712  | -0.704546 | -3.201964  |
| araJ | 0.340881  | -1.892264 | -7.937542  |
| htgA | 0.222124  | -0.583714 | -2.823011  |
| oxc  | 0.393811  | -0.847068 | -4.016585  |
| rusA | 0.895108  | -2.187366 | -9.474009  |



|      |          |           |           |
|------|----------|-----------|-----------|
| amiA | 0.222802 | -0.514429 | -2.272621 |
| ybgK | 0.277358 | -0.743753 | -3.190192 |
| ulaC | 0.454688 | -1.162714 | -5.097295 |
| yggP | 0.183497 | -0.601084 | -2.696924 |
| yaiW | 0.135385 | -0.466615 | -1.986296 |
| phoR | 0.20156  | -0.800687 | -3.78792  |
| mglA | 0.164936 | -0.536332 | -2.942571 |
| yedV | 0.303496 | -0.941706 | -4.92101  |
| yjbR | 0.488753 | -0.55567  | -2.1166   |
| smpA | 0.664735 | -0.715167 | -2.863646 |
| dsbC | 0.305492 | -0.366147 | -1.446501 |
| yadH | 0.956602 | -0.975171 | -3.48485  |
| yqjB | 0.877828 | -0.790425 | -3.221125 |
| yahL | 0.315567 | -0.256296 | -1.30425  |
| pdxY | 0.522408 | -0.592072 | -2.593946 |
| yfiA | 0.210567 | -0.19586  | -1.005354 |
| hisF | 0.230362 | -0.222372 | -1.082375 |
| araE | 0.349885 | -0.473262 | -2.139818 |
| yiaM | 0.930264 | -1.086866 | -5.389383 |
| yfeA | 0.66786  | -1.08612  | -3.529823 |
| ygcW | 0.679946 | -0.96404  | -3.256575 |
| yihS | 0.503907 | -0.821398 | -2.876047 |
| yiaT | 0.526027 | -0.795209 | -3.011652 |
| xdhD | 0.718761 | -1.710541 | -5.987452 |
| qor  | 0.546787 | -1.102527 | -4.268301 |
| yidL | 0.475331 | -0.893502 | -3.327008 |
| yajB | 0.646622 | -1.300407 | -4.71176  |
| ibpB | 0.471523 | -0.830035 | -3.202326 |
| bioA | 0.513059 | -0.876087 | -3.631305 |
| norW | 0.445834 | -0.099938 | -2.917721 |
| lpxA | 0.551478 | -0.174177 | -3.427812 |
| ykgE | 0.420895 | -0.154078 | -2.734232 |
| eptB | 0.270989 | -0.086418 | -2.091295 |
| idnK | 0.099829 | -0.02535  | -0.834333 |
| flgF | 0.154528 | -0.093806 | -0.912165 |
| yaiA | 0.367228 | -0.219065 | -2.325829 |
| ydcH | 0.817205 | -0.591819 | -5.243802 |
| hybB | 0.593403 | -0.267469 | -3.238158 |
| ybiA | 0.515369 | -0.172186 | -2.837944 |
| yddJ | 0.235732 | -0.104418 | -1.033794 |
| yliF | 0.674429 | -0.182628 | -2.849906 |
| mhpR | 0.484876 | -0.250083 | -1.980995 |
| ebgA | 0.575115 | -0.353332 | -2.488823 |
| yjeM | 0.588931 | -0.339469 | -2.47903  |
| aroL | 0.985642 | -0.736054 | -4.752334 |
| hyfB | 0.73138  | -0.52392  | -3.471252 |
| yiaB | 0.702991 | -0.505329 | -3.034123 |
| pfkB | 0.525913 | -0.377357 | -2.342668 |
| ybbA | 0.370626 | -0.26836  | -1.652677 |
| yafW | 0.904934 | -0.633477 | -4.726735 |
| bcsF | 0.525796 | -0.272824 | -1.834168 |
| elaD | 0.367979 | -0.203802 | -1.384063 |
| yhjK | 1.137667 | -0.515969 | -4.191309 |
| dam  | 2.892216 | -1.521134 | -8.319112 |
| tfaE | 0.540146 | -0.248049 | -1.501843 |
| yiaO | 1.062189 | -0.482745 | -3.250163 |
| rffE | 1.224641 | -0.450912 | -3.665224 |
| ykgI | 0.848625 | -0.313364 | -2.360415 |
| mtlD | 1.076508 | -0.326294 | -3.440037 |
| intB | 0.344509 | -0.264445 | -1.115077 |
| ypjA | 1.097344 | -0.927311 | -3.576515 |

|      |          |           |           |
|------|----------|-----------|-----------|
| btuR | 0.749746 | -0.517967 | -2.456017 |
| ybiY | 0.989227 | -0.677924 | -3.279638 |
| yffH | 0.88159  | -0.570461 | -2.536062 |
| ycgN | 0.821939 | -0.562446 | -2.34066  |
| elbA | 0.263237 | -0.18866  | -0.777401 |
| ynjC | 0.58427  | -0.283792 | -1.354108 |
| ygfO | 1.24151  | -0.490163 | -2.77915  |
| yhhL | 1.824149 | -0.990993 | -4.554227 |
| gltI | 1.131528 | -0.69533  | -2.948054 |
| livJ | 0.920639 | -0.538071 | -2.380457 |
| phnC | 0.700812 | -0.447458 | -1.478026 |
| rluC | 0.322819 | -0.211849 | -0.636228 |
| yiiT | 0.268428 | -0.234426 | -0.621679 |
| yhaC | 0.306604 | -0.210978 | -0.756521 |
| ydhR | 1.079552 | -0.873455 | -2.658085 |
| yohJ | 0.248554 | -0.187803 | -0.598588 |
| yebZ | 0.879125 | -0.667537 | -2.121845 |
| yaiL | 0.659386 | -0.525996 | -1.530264 |
| yidI | 1.286595 | -1.213878 | -2.727706 |
| ybbJ | 0.250683 | -0.215055 | -0.497528 |
| zraR | 0.473116 | -0.513923 | -0.997653 |
| ytfJ | 0.621038 | -0.616103 | -1.263185 |
| aidB | 1.01927  | -1.02929  | -2.033531 |
| ilvA | 1.558802 | -1.597594 | -3.607755 |
| yiiF | 0.756241 | -0.857856 | -1.872942 |
| arcA | 0.757819 | -0.782646 | -2.431923 |
| cysl | 0.999037 | -1.223389 | -3.289439 |
| idi  | 0.550792 | -0.686741 | -1.896646 |
| ugpC | 0.762391 | -1.151451 | -2.961613 |
| pdhR | 0.71132  | -1.007611 | -2.606704 |
| ybcN | 2.136823 | -2.82355  | -8.695819 |
| ugpA | 0.649481 | -1.078217 | -2.902378 |
| ykgG | 0.429732 | -0.777125 | -2.295835 |
| ybgH | 0.322774 | -0.475265 | -0.973818 |
| yaaH | 1.019847 | -1.277285 | -2.92039  |
| rhIE | 1.190776 | -1.572659 | -3.525183 |
| ygck | 0.252514 | -0.360408 | -0.815056 |
| yliG | 0.756725 | -1.064993 | -2.317607 |
| ygjQ | 0.41174  | -0.454935 | -1.223032 |
| yehQ | 0.694354 | -0.851952 | -2.095795 |
| cpxR | 0.889195 | -0.957777 | -2.322572 |
| yjhX | 0.796293 | -0.93446  | -2.151524 |
| eutQ | 0.722721 | -0.863878 | -1.968177 |
| yqaB | 1.399935 | -1.626618 | -3.885461 |
| ytfG | 0.328978 | -0.507385 | -1.180372 |
| yfdN | 0.220671 | -0.337272 | -0.80318  |
| yidF | 0.808956 | -1.326671 | -3.039874 |
| glcD | 0.794417 | -1.39742  | -3.26447  |
| ybgL | 0.560933 | -0.962578 | -2.019561 |
| frlA | 0.423653 | -0.665817 | -1.434003 |
| uhpA | 1.274353 | -2.619979 | -5.681317 |
| dsbG | 0.443491 | -0.960509 | -2.081266 |
| yhiJ | 0.521041 | -0.997954 | -2.127082 |
| yaiB | 0.304612 | -0.576185 | -1.187445 |
| alsC | 0.374761 | -0.685722 | -1.230099 |
| sfcA | 0.377181 | -0.641144 | -1.213976 |
| ygch | 1.119961 | -1.849198 | -3.51596  |
| yjiX | 0.83927  | -1.535979 | -2.918453 |
| rbsK | 0.597737 | -1.053144 | -2.095124 |
| mobB | 0.967069 | -1.731752 | -2.980465 |
| rfaZ | 0.731664 | -1.382594 | -2.340362 |

|      |           |           |           |
|------|-----------|-----------|-----------|
| mhpC | 0.666384  | -1.128537 | -1.938801 |
| yedW | 0.972876  | -2.013008 | -3.481892 |
| yegH | 0.429899  | -0.85716  | -1.700884 |
| guaD | 0.66376   | -1.387378 | -2.612264 |
| yicC | 1.401866  | -3.542794 | -6.533646 |
| fucP | 0.331194  | -0.813295 | -1.489141 |
| eutG | 0.61659   | -1.515252 | -2.786935 |
| bax  | 0.551929  | -1.336888 | -2.373181 |
| aroP | -0.440151 | -0.771872 | -1.626986 |
| ptsl | -0.296305 | -0.682639 | -1.420454 |
| queA | -0.389261 | -0.845175 | -1.634548 |
| ulaE | -0.314631 | -0.689851 | -1.356535 |
| ygdB | -0.386749 | -0.967602 | -1.820424 |
| ushA | -0.734151 | -1.718139 | -3.194774 |
| ypdH | -0.980278 | -2.510068 | -4.876351 |
| frlB | -0.212433 | -0.982857 | -1.672666 |
| ybiM | -0.552234 | -2.572746 | -4.337574 |
| ycdQ | -0.260579 | -1.090597 | -1.731567 |
| syd  | -0.291203 | -0.908859 | -1.507845 |
| ybgJ | -0.609439 | -1.700717 | -3.063501 |
| sohA | -0.186403 | -1.949963 | -4.254771 |
| yjhR | -0.062816 | -1.498441 | -3.294006 |
| yjeO | -0.098038 | -1.534723 | -3.70501  |
| ygeO | -0.028623 | -1.468538 | -3.786567 |
| ycgY | -0.018235 | -1.432455 | -3.512081 |
| bcsE | 0.021592  | -1.455767 | -3.575346 |
| hupB | -0.704415 | -2.968533 | -5.950838 |
| argC | -0.31823  | -1.15231  | -2.362592 |
| yqiG | -0.413538 | -1.476231 | -3.071049 |
| yjhG | -0.234987 | -0.916755 | -1.736366 |
| yehA | -0.259002 | -0.990314 | -1.911107 |
| metA | -0.07768  | -0.640054 | -1.198171 |
| fdnG | -0.038222 | -0.302259 | -0.572442 |
| yeaH | -0.260636 | -1.339229 | -2.514998 |
| mdtH | -0.351354 | -2.090381 | -4.327928 |
| sspB | -0.128643 | -0.863402 | -1.794693 |
| yijE | -0.112279 | -0.717873 | -1.488035 |
| rtcR | -0.352825 | -1.905358 | -3.8562   |
| cysP | -0.300829 | -1.579637 | -3.249338 |
| puuR | -0.215851 | -1.184939 | -2.357356 |
| pncB | -0.141613 | -0.897135 | -1.761274 |
| ycgK | -0.994012 | -2.726333 | -5.72447  |
| yedK | -0.498263 | -1.359722 | -3.017492 |
| feoA | -0.252468 | -1.039567 | -2.262332 |
| ycgF | -0.272776 | -0.977329 | -2.193865 |
| tdcB | -0.388513 | -1.245671 | -2.965549 |
| fabR | -0.546914 | -1.797205 | -4.367362 |
| fumA | -0.419524 | -1.380141 | -3.337755 |
| ybgE | -0.30156  | -0.645479 | -2.022785 |
| yail | -0.839899 | -1.66812  | -5.263702 |
| yieN | -0.293563 | -0.541855 | -1.676009 |
| ilvH | -0.367526 | -0.662366 | -2.023586 |
| yqeG | -0.599492 | -1.14479  | -3.462543 |
| nagD | -0.397523 | -0.706523 | -1.994967 |
| puuP | -0.542499 | -1.219292 | -3.259231 |
| yccF | -0.506942 | -1.010575 | -2.633577 |
| ogt  | -0.133919 | -0.740598 | -1.880099 |
| talA | -0.184993 | -0.979735 | -2.456018 |
| yneG | -0.253102 | -1.529266 | -3.940203 |
| yicl | -0.292321 | -1.504101 | -4.200849 |
| yjiH | -0.29417  | -0.985166 | -2.600143 |

|      |           |           |           |
|------|-----------|-----------|-----------|
| cybB | -0.493112 | -1.583929 | -4.247744 |
| ydcK | -0.407624 | -1.131384 | -3.25376  |
| cutC | -0.259216 | -0.738519 | -2.06137  |
| umuC | -0.291163 | -0.791252 | -2.179517 |
| ybjH | -0.250975 | -0.716759 | -2.184852 |
| yhfY | -0.689231 | -2.375843 | -7.294127 |
| manZ | -0.023691 | -0.082467 | -0.237262 |
| hypE | -0.087385 | -0.552923 | -2.066372 |
| yjgN | -0.040215 | -0.407771 | -1.594656 |
| cmtA | -0.013825 | -0.145892 | -0.610623 |
| yedF | -0.017156 | -0.168661 | -0.743741 |
| hcaR | 0.006348  | -0.744432 | -3.343488 |
| mazG | -0.069414 | -0.333156 | -1.669323 |
| pepD | -0.180577 | -1.374001 | -7.228364 |
| nagB | -0.165794 | -0.500364 | -2.83709  |
| nirD | -0.089437 | -0.402411 | -1.251664 |
| yjgZ | -0.105901 | -0.720822 | -2.271452 |
| thiE | -0.168631 | -1.191724 | -3.631168 |
| ybhD | -0.085102 | -0.446098 | -1.464148 |
| glkK | -0.149998 | -0.966409 | -3.321223 |
| araH | -0.252812 | -1.20951  | -4.257733 |
| yrhA | -0.063647 | -0.320476 | -1.107145 |
| yddL | -0.06396  | -0.755687 | -2.355571 |
| sgcR | -0.03227  | -0.42006  | -1.375249 |
| cynX | -0.097051 | -1.210698 | -4.064262 |
| prpE | -0.578498 | -2.094814 | -7.888435 |
| ybjD | 0.013008  | -0.327879 | -0.96676  |
| yhjA | 0.030833  | -0.813348 | -2.447012 |
| yihI | -0.017211 | -1.41458  | -3.908722 |
| viaU | 0.051647  | -1.579004 | -4.379106 |
| ymgG | -0.12119  | -1.398074 | -4.005779 |
| kptA | -0.070471 | -1.212068 | -3.367459 |
| yacC | 0.093874  | -0.783186 | -2.501848 |
| ycgZ | 0.127119  | -1.126829 | -3.559811 |
| fliL | 0.045519  | -0.411535 | -1.350405 |
| prfH | 0.046537  | -0.335608 | -1.130202 |
| hyfR | 0.135916  | -0.820025 | -2.757703 |
| ybeU | 0.050549  | -0.625981 | -2.233798 |
| yohM | 0.02618   | -1.270194 | -4.575316 |
| hcaD | 0.023583  | -1.114669 | -3.622434 |
| ycjY | 0.036401  | -0.912942 | -3.157812 |
| mdtA | 0.022676  | -0.730194 | -2.453974 |
| ybjI | 0.117177  | -0.356621 | -1.389021 |
| yraP | 0.213073  | -0.902717 | -3.258118 |
| gudD | 0.242955  | -0.914367 | -2.883922 |
| trpE | 0.143217  | -0.703962 | -2.277102 |
| yhiQ | 0.195301  | -0.917308 | -2.001457 |
| yjbl | 0.083326  | -0.375427 | -0.851336 |
| hofB | 0.201659  | -0.831552 | -1.8989   |
| pphA | 0.071577  | -0.289718 | -0.659424 |
| yggM | 0.205961  | -0.790523 | -1.752628 |
| ygjN | 0.272524  | -1.103576 | -2.418461 |
| zitB | 0.322398  | -1.936476 | -4.015299 |
| ydjE | 0.273795  | -1.393883 | -2.858743 |
| ybhP | 0.198929  | -1.429465 | -3.02239  |
| yicS | 0.468666  | -1.626257 | -3.365274 |
| ydeN | 0.346738  | -1.370298 | -2.621769 |
| avtA | 0.494042  | -1.215754 | -2.751332 |
| ybhF | 0.453671  | -1.527616 | -3.382067 |
| ygjG | 0.14635   | -0.421118 | -0.956198 |
| ltaE | 0.391473  | -0.956824 | -2.458911 |

|      |           |           |            |
|------|-----------|-----------|------------|
| nikE | 0.601327  | -1.481948 | -3.787845  |
| htrC | 0.430207  | -0.956962 | -2.462213  |
| yfhK | 0.695139  | -1.536481 | -4.065032  |
| livH | 0.604851  | -2.15515  | -5.154818  |
| yegX | 0.274542  | -0.856125 | -2.172251  |
| deoB | 0.14586   | -1.452918 | -3.614882  |
| ydcV | 0.121803  | -0.918382 | -2.075195  |
| ylaC | 0.315326  | -1.857804 | -4.461169  |
| yjiJ | 0.26427   | -1.495312 | -4.219681  |
| ybhC | 0.229562  | -1.403397 | -3.913155  |
| ybcO | 0.695597  | -4.266628 | -11.359678 |
| xthA | 0.185244  | -1.163961 | -3.084351  |
| yfhM | 0.31732   | -1.699758 | -4.630617  |
| gntU | 0.080195  | -0.352156 | -0.905617  |
| ytfT | 0.411589  | -1.25897  | -3.348624  |
| lyxK | 0.240523  | -0.761545 | -2.100866  |
| ygjR | 0.252737  | -0.829274 | -2.407554  |
| proA | 0.220521  | -0.724852 | -2.095784  |
| torZ | 0.114793  | -0.45732  | -1.334469  |
| ygiL | 0.232442  | -0.57891  | -1.720079  |
| pbl  | 0.239461  | -0.617793 | -1.980234  |
| ymgF | 0.237817  | -0.685313 | -2.082285  |
| yjeK | 0.333422  | -3.388549 | -3.822846  |
| hisQ | 0.213361  | -1.445304 | -1.694888  |
| polB | 0.067778  | -0.934776 | -1.187685  |
| nadC | 0.153402  | -2.195722 | -2.689232  |
| fhuB | 0.012884  | -0.168399 | -0.203234  |
| ninE | 0.543442  | -5.378735 | -6.517067  |
| caiA | 0.117628  | -1.247615 | -1.522553  |
| ybfA | 0.024958  | -0.943762 | -1.098051  |
| ygeP | -0.062351 | -1.988054 | -2.33812   |
| yiiQ | -0.009615 | -1.830231 | -2.192732  |
| topB | -0.090593 | -2.487503 | -3.163388  |
| rpoS | -0.070273 | -1.359537 | -1.709121  |
| hupA | 0.530061  | -2.379665 | -2.781653  |
| ybeQ | 0.105014  | -0.540662 | -0.623714  |
| hslV | 0.70005   | -2.480344 | -2.836197  |
| pppA | 0.414239  | -1.735499 | -1.86061   |
| xyIR | 0.60096   | -2.021074 | -2.65886   |
| yfbQ | 0.247266  | -0.845902 | -1.115514  |
| phr  | 0.4544    | -1.850578 | -2.521107  |
| yjfY | 0.231776  | -0.95378  | -1.161835  |
| yfiD | 0.365458  | -1.480774 | -1.894464  |
| yhbG | 0.407261  | -2.182192 | -2.846249  |
| trkD | 0.239482  | -1.310909 | -1.710992  |
| kch  | 0.335818  | -1.651159 | -2.118444  |
| torR | 0.555264  | -1.45139  | -2.051963  |
| fieF | 0.337953  | -1.090562 | -1.591155  |
| metN | 0.645726  | -2.011938 | -3.020633  |
| ypfH | 0.458757  | -1.544901 | -2.313693  |
| speC | 0.338225  | -1.28635  | -1.874666  |
| yebN | 0.665785  | -1.637606 | -2.62463   |
| yhdU | 0.405152  | -1.143879 | -1.76745   |
| ansB | 0.583443  | -1.647131 | -2.526977  |
| ygbM | 0.308652  | -0.913291 | -1.414421  |
| lpp  | 2.817322  | -7.336159 | -11.346269 |
| ccmE | 0.115925  | -0.313434 | -0.468216  |
| yhiR | 0.351013  | -0.990537 | -1.613219  |
| yfeK | 0.253352  | -0.799191 | -1.34359   |
| emrA | 0.127576  | -0.488543 | -0.79916   |
| ycdL | 0.388566  | -1.432931 | -2.383261  |

|      |           |           |           |
|------|-----------|-----------|-----------|
| eutA | 0.282718  | -1.075581 | -1.710683 |
| kdul | 0.158333  | -0.954772 | -1.468072 |
| hokE | 0.132409  | -0.909268 | -1.464382 |
| yraN | 0.304435  | -1.580602 | -2.260472 |
| yphF | 0.275608  | -1.450295 | -2.127017 |
| intS | 0.665018  | -2.90943  | -4.317314 |
| glxR | 0.326406  | -1.535161 | -2.3292   |
| prlC | 0.240689  | -1.956956 | -2.72614  |
| bcsA | 0.291303  | -2.58845  | -3.663345 |
| yghO | 0.327605  | -2.651331 | -4.722279 |
| yeeJ | 0.114426  | -0.878945 | -1.51491  |
| yhgG | 0.131317  | -1.655843 | -3.315672 |
| yjhl | 0.110802  | -0.997569 | -1.931067 |
| yaiZ | 0.314486  | -2.890613 | -5.570829 |
| upp  | 0.361509  | -2.372077 | -4.492745 |
| hyi  | 0.163842  | -1.109746 | -2.084007 |
| rimK | 0.057679  | -1.620837 | -3.150312 |
| hyfF | 0.088602  | -2.896142 | -5.504624 |
| yjiD | 0.067118  | -0.929378 | -1.604056 |
| yfdX | 0.074939  | -2.325626 | -4.105173 |
| yehD | 0.086585  | -1.551667 | -2.759478 |
| ypfl | 0.122381  | -1.91426  | -3.473759 |
| dhaR | -0.003601 | -1.727032 | -3.057868 |
| narW | 0.158929  | -2.024096 | -3.194558 |
| uidB | 0.030223  | -0.497646 | -0.757973 |
| yjiY | 0.127919  | -1.739142 | -2.660892 |
| ygeH | 0.103986  | -1.31668  | -2.030922 |
| yedD | 0.094182  | -1.87458  | -3.011846 |
| yhhH | 0.069855  | -2.20789  | -3.405415 |
| helD | -0.076754 | -1.963964 | -2.793206 |
| ydiB | -0.029166 | -0.847842 | -1.202418 |
| nrdG | -0.157194 | -2.457163 | -3.666642 |
| ymfO | 0.001415  | -0.708356 | -1.047006 |
| yjjP | -0.131999 | -1.060512 | -1.895329 |
| cysJ | -0.559485 | -3.526433 | -6.226529 |
| ygiU | -0.272398 | -1.877435 | -3.173958 |
| mutY | -0.199596 | -1.800619 | -3.031315 |
| yfgL | -0.244059 | -2.011848 | -3.186369 |
| yjjV | -0.12499  | -1.133198 | -1.742871 |
| yceO | -0.107573 | -1.324149 | -2.085682 |
| ybbC | -0.101106 | -1.27887  | -2.006467 |
| argG | -0.048751 | -1.64212  | -2.665017 |

**Table S7. Significantly sensitive gene mutants in the presence of keyicin, Ethidium bromide (EtBr), and methyl methanesulfonate (MMS)**

| Keyicin 12.5 µg/mL |             |                  | EtBr 100 µg/mL |             |                  | MMS 0.0125% |             |                  |
|--------------------|-------------|------------------|----------------|-------------|------------------|-------------|-------------|------------------|
| GENE               | fold-Change | Adjusted P-value | GENE           | fold-Change | Adjusted P-value | GENE        | fold-Change | Adjusted P-value |
| prc                | 0.471517469 | 0.000193446      | acrA           | 0.03900458  | 1.69464E-37      | recA        | 0.014825568 | 1.33E-56         |
| sapF               | 0.481388022 | 0.045127861      | acrB           | 0.056503908 | 5.42582E-44      | recA        | 0.054774353 | 8.68E-17         |
| nlpl               | 0.511739137 | 0.028754677      | lpp            | 0.065730478 | 4.45062E-15      | acrB        | 0.055728656 | 5.91E-84         |
| metA               | 0.539455401 | 0.0019362        | lpp            | 0.072528038 | 2.11043E-26      | acrA        | 0.088818949 | 1.40E-51         |
| wzxC               | 0.550850365 | 0.048721221      | ninE           | 0.08687639  | 1.55476E-39      | acrB        | 0.127156263 | 1.11E-24         |
| dsbB               | 0.552327707 | 0.000714636      | yhcB           | 0.095359371 | 5.54789E-07      | yrbF        | 0.14732306  | 3.08E-40         |
| ihfA               | 0.563134603 | 3.62966E-05      | rusA           | 0.107596707 | 1.20149E-27      | rfaQ        | 0.160337762 | 2.67E-37         |
| ydeT               | 0.573863681 | 0.00023457       | acrB           | 0.115913283 | 9.44772E-21      | rfaQ        | 0.173836199 | 5.36E-30         |
| treC               | 0.575820972 | 0.013652674      | nlpl           | 0.155580863 | 2.27753E-08      | kdpD        | 0.185291851 | 3.06E-17         |
| fadR               | 0.582190494 | 0.031554405      | ycdR           | 0.156963933 | 2.85949E-11      | recR        | 0.218956863 | 0.000103057      |
| ihfA               | 0.58909844  | 0.031073933      | prc            | 0.158843774 | 1.39173E-17      | yrbD        | 0.224315078 | 8.51E-14         |
| ihfB               | 0.591119587 | 0.001566314      | tolC           | 0.160889179 | 0.002465329      | yrbB        | 0.229871053 | 9.34E-23         |
| gcvH               | 0.592732575 | 0.022256965      | dam            | 0.161753169 | 4.39291E-16      | tolC        | 0.234705093 | 0.004576335      |
| solA               | 0.59437474  | 0.049321823      | araJ           | 0.171537786 | 7.48227E-10      | yrbC        | 0.23899238  | 2.91E-15         |
| prc                | 0.60345449  | 0.004794452      | ylcG           | 0.171868199 | 2.8877E-11       | yrbD        | 0.239513682 | 1.44E-12         |
| yeaU               | 0.604525594 | 0.017056394      | yggS           | 0.184166551 | 1.87183E-11      | vacJ        | 0.243792788 | 1.62E-19         |
| nlpl               | 0.607674899 | 3.62966E-05      | ybcO           | 0.18470459  | 3.03226E-08      | narQ        | 0.244187234 | 2.91E-15         |
| trkA               | 0.609361082 | 0.014064958      | recA           | 0.19105869  | 1.45121E-17      | asmA        | 0.259374075 | 0.001961592      |
| yeaX               | 0.610175858 | 0.045863199      | prc            | 0.191612222 | 1.16732E-10      | ruvC        | 0.260538877 | 0.0012043        |
| deaD               | 0.619704159 | 0.016578432      | hpt            | 0.192586395 | 3.74883E-12      | ydcQ        | 0.262978504 | 1.81E-07         |
| dsbB               | 0.622165886 | 0.012632819      | hcr            | 0.193698439 | 2.72225E-18      | ybhT        | 0.283508161 | 5.50E-16         |
| ycbQ               | 0.624261089 | 0.027297225      | ybcO           | 0.197070065 | 1.67855E-10      | rseB        | 0.287659593 | 4.66E-13         |
| clpP               | 0.625832305 | 0.024178968      | ylcG           | 0.199374794 | 5.48485E-15      | ruvB        | 0.288219161 | 0.005803723      |
| flgJ               | 0.62823942  | 0.013652674      | ybcN           | 0.200873437 | 2.00382E-12      | phoP        | 0.291954009 | 2.08E-08         |
| slyA               | 0.629751278 | 0.038708273      | prpE           | 0.202414809 | 1.82823E-18      | vacJ        | 0.303620567 | 5.98E-12         |
| speE               | 0.632819452 | 0.022256965      | sohA           | 0.214476837 | 1.50549E-34      | alkA        | 0.303760332 | 3.08E-10         |
| gatZ               | 0.635022144 | 0.017712278      | rpoS           | 0.217324751 | 0.002293154      | recB        | 0.312653103 | 1.04E-07         |
| ynfE               | 0.642925781 | 0.007787069      | ybcN           | 0.218837965 | 1.20678E-13      | phoQ        | 0.312765974 | 0.000725538      |
| potC               | 0.648485921 | 0.013965983      | ilvH           | 0.219186542 | 1.67276E-26      | ruvA        | 0.331080869 | 0.000103057      |
| fimA               | 0.649394462 | 0.012447265      | yafM           | 0.223227678 | 8.84737E-25      | holC        | 0.33215226  | 2.24E-06         |
| ydaT               | 0.653923953 | 0.019317657      | barA           | 0.225820107 | 1.48645E-36      | recO        | 0.335910211 | 3.06E-17         |
| melB               | 0.654467553 | 0.033893625      | yqjH           | 0.228209376 | 1.2049E-06       | phoQ        | 0.338007585 | 4.59E-07         |
| ydfZ               | 0.655946017 | 0.049602142      | cysJ           | 0.228273973 | 2.27324E-07      | dnaQ        | 0.343778225 | 0.000948631      |
| yjjZ               | 0.666144153 | 0.039695786      | rffE           | 0.230050424 | 3.28157E-10      | recB        | 0.352768171 | 0.000140233      |
| puuC               | 0.669559451 | 0.045863199      | sspA           | 0.232236634 | 1.95544E-18      | rfal        | 0.361882668 | 2.68E-09         |
| tam                | 0.669881271 | 0.033879985      | fis            | 0.233084764 | 2.55733E-16      | tig         | 0.362099988 | 4.73E-10         |
| fimF               | 0.675259638 | 0.014226575      | fhuC           | 0.235074514 | 2.0007E-07       | yfgL        | 0.364897755 | 0.000112385      |
| ydhP               | 0.676912698 | 0.028974795      | sufD           | 0.235351384 | 0.000851426      | yhcB        | 0.366000331 | 0.023264182      |
| ydhV               | 0.678827097 | 0.039736233      | emrE           | 0.236476555 | 3.73301E-06      | rfaH        | 0.369022931 | 0.001149981      |
| otsA               | 0.680531574 | 0.03532254       | ygeL           | 0.239563967 | 0.001947257      | asmA        | 0.370079762 | 9.15E-06         |
| glk                | 0.680980575 | 0.012732629      | mtlD           | 0.243059723 | 3.50319E-14      | rfaG        | 0.374756755 | 0.000112385      |
| yodB               | 0.68461849  | 0.041761221      | nlpl           | 0.245066858 | 1.84747E-24      | hrpA        | 0.381210917 | 0.01140988       |

|      |             |             |      |             |             |      |             |             |
|------|-------------|-------------|------|-------------|-------------|------|-------------|-------------|
| ygdD | 0.688517748 | 0.036825301 | yhiD | 0.246216618 | 6.96835E-20 | ompA | 0.38527099  | 0.000274037 |
| dcd  | 0.69043265  | 0.048721221 | thrC | 0.24887471  | 3.55411E-06 | yhhF | 0.39048933  | 0.009516876 |
| ydeK | 0.695100494 | 0.041872712 | ypdH | 0.250000905 | 2.62026E-16 | yrbC | 0.39195006  | 1.31E-07    |
| narH | 0.701927206 | 0.04220949  | yahD | 0.255641026 | 1.78525E-24 | yrbB | 0.394911168 | 1.57E-06    |
| rfdD | 0.703296338 | 0.019317657 | ulaC | 0.259325032 | 6.10867E-06 | phoP | 0.407948463 | 0.002685211 |
| mdbO | 0.704407132 | 0.049602142 | lpxA | 0.260828769 | 2.66373E-48 | narQ | 0.408821679 | 1.32E-11    |
| rep  | 0.710643977 | 0.04008128  | pstA | 0.261627213 | 3.23768E-16 | rfaY | 0.409542379 | 0.000499703 |
| sgcC | 0.73265457  | 0.041072785 | dam  | 0.26489758  | 6.48515E-15 | recE | 0.42263939  | 4.67E-07    |
|      |             |             | ugpC | 0.269089286 | 1.6057E-12  | potA | 0.423681492 | 0.00147019  |
|      |             |             | rpoZ | 0.272753818 | 2.19566E-28 | yjeK | 0.427651533 | 1.70E-08    |
|      |             |             | rusA | 0.273074185 | 3.46758E-17 | galU | 0.428829384 | 0.036142093 |
|      |             |             | intS | 0.273475473 | 4.94981E-09 | ptsP | 0.434907502 | 7.25E-06    |
|      |             |             | kdpD | 0.275446087 | 3.239E-13   | ydfV | 0.435879444 | 3.21E-06    |
|      |             |             | tdk  | 0.275997383 | 9.29034E-25 | ybjX | 0.442894608 | 0.000146373 |
|      |             |             | sspA | 0.276243533 | 1.11794E-17 | recG | 0.448432626 | 8.05E-10    |
|      |             |             | yail | 0.277845064 | 3.1714E-06  | rpoZ | 0.453387715 | 1.14E-09    |
|      |             |             | xylF | 0.277849986 | 5.28052E-05 | sgbU | 0.461236518 | 4.42E-08    |
|      |             |             | ygfF | 0.28121398  | 1.14507E-16 | sspA | 0.465969753 | 3.07E-05    |
|      |             |             | ynbC | 0.281258717 | 0.008519679 | recT | 0.466155142 | 0.000715558 |
|      |             |             | uxuR | 0.281479753 | 1.09241E-16 | baeS | 0.46881543  | 1.33E-05    |
|      |             |             | fhuA | 0.282189745 | 1.14507E-16 | sspA | 0.469927773 | 0.000841994 |
|      |             |             | tig  | 0.282643985 | 4.45867E-15 | dinJ | 0.475603019 | 3.67E-06    |
|      |             |             | mdtF | 0.287034602 | 7.46587E-13 | yfgL | 0.476396883 | 0.00699311  |
|      |             |             | bcsA | 0.287315904 | 1.67218E-15 | yrbG | 0.489377026 | 8.51E-05    |
|      |             |             | sgcE | 0.288771287 | 7.83225E-05 | ninE | 0.491819994 | 3.33E-08    |
|      |             |             | hcaF | 0.291034725 | 3.89442E-11 | ybjX | 0.492812879 | 0.001669826 |
|      |             |             | yhfY | 0.294226479 | 2.01344E-05 | hupA | 0.501677739 | 0.033475655 |
|      |             |             | phr  | 0.29457872  | 0.001885106 | recG | 0.50290046  | 3.34E-05    |
|      |             |             | recA | 0.295393605 | 2.75735E-05 | rseC | 0.50435804  | 9.58E-05    |
|      |             |             | yggS | 0.296637207 | 0.000194885 | dinJ | 0.506240153 | 7.62E-09    |
|      |             |             | eutT | 0.298515477 | 8.95358E-14 | potB | 0.510664676 | 0.009910952 |
|      |             |             | rscF | 0.299229295 | 2.40682E-17 | rpoZ | 0.51265701  | 0.045494928 |
|      |             |             | oxc  | 0.300024469 | 1.78651E-07 | hyfl | 0.514004635 | 0.02921961  |
|      |             |             | hupB | 0.30003565  | 0.00019865  | rssA | 0.515592227 | 0.002265439 |
|      |             |             | yafW | 0.302093158 | 4.50692E-07 | nagA | 0.518321242 | 0.000152245 |
|      |             |             | ybbC | 0.303809681 | 0.000206537 | purR | 0.519684741 | 1.63E-07    |
|      |             |             | tgt  | 0.303947323 | 1.58338E-06 | fimE | 0.528221921 | 0.024441254 |
|      |             |             | prpD | 0.304796049 | 5.26273E-10 | rseB | 0.529829667 | 0.000514483 |
|      |             |             | yiaM | 0.308942902 | 3.57389E-08 | hupB | 0.533865643 | 0.036464705 |
|      |             |             | yeeD | 0.3107854   | 2.41233E-10 | ybcO | 0.540644245 | 0.009010278 |
|      |             |             | rfaF | 0.312445469 | 0.002096148 | hrpA | 0.541971334 | 0.00276088  |
|      |             |             | yicC | 0.312460751 | 1.24104E-16 | ruvA | 0.546115442 | 0.042154256 |
|      |             |             | rseB | 0.314470832 | 5.12525E-09 | cpdA | 0.548310314 | 0.018188256 |
|      |             |             | yfiQ | 0.314762552 | 3.11382E-13 | recF | 0.548564605 | 0.009108748 |
|      |             |             | pepD | 0.316640444 | 0.003365984 | yeiU | 0.550522736 | 0.008945005 |
|      |             |             | ushA | 0.316680356 | 4.12265E-07 | dipZ | 0.552326273 | 0.001285173 |



|      |             |             |      |             |             |
|------|-------------|-------------|------|-------------|-------------|
| yjgJ | 0.317266419 | 1.63919E-15 | rph  | 0.553714375 | 8.76E-05    |
| relA | 0.320208605 | 2.80697E-09 | yhbG | 0.553731985 | 0.005775387 |
| ycdC | 0.320336946 | 8.46464E-13 | hlpA | 0.556461495 | 0.002266774 |
| ycjT | 0.32042499  | 0.011199241 | ybcO | 0.561226267 | 0.000414286 |
| ybfQ | 0.321280156 | 0.000234581 | nlpl | 0.562559715 | 0.043154248 |
| ybhC | 0.322195975 | 2.70224E-11 | ptsP | 0.564525386 | 0.005976205 |
| yajB | 0.322404647 | 2.00677E-13 | ybhT | 0.564712542 | 0.00217712  |
| recB | 0.322522501 | 1.36218E-07 | yhiL | 0.566615046 | 0.005175817 |
| sbp  | 0.322718584 | 6.95931E-11 | yrbL | 0.567713564 | 0.006372764 |
| aphA | 0.32358897  | 1.51516E-06 | acrE | 0.571958821 | 0.008401648 |
| tgt  | 0.325031082 | 1.71975E-09 | yifE | 0.575481278 | 0.000146373 |
| yadD | 0.326421897 | 3.77151E-14 | pepT | 0.575770532 | 0.028976392 |
| dinI | 0.329922699 | 3.66699E-15 | ygiU | 0.57711283  | 0.029403186 |
| bcsE | 0.330165988 | 0.00025954  | qseC | 0.57877566  | 0.021898324 |
| yfjY | 0.330834996 | 5.35221E-15 | prc  | 0.579780104 | 0.044714072 |
| trmC | 0.33092766  | 5.84666E-13 | yiaY | 0.582568023 | 0.017237479 |
| yneL | 0.332094493 | 0.000181098 | ptsG | 0.590770741 | 0.002630297 |
| mdtH | 0.332159386 | 4.38464E-13 | dedA | 0.590825334 | 0.015873156 |
| ompA | 0.333545623 | 1.21259E-06 | npr  | 0.598088878 | 0.000862832 |
| xapB | 0.333756359 | 9.76079E-13 | acrE | 0.599601626 | 0.013928004 |
| frsA | 0.335028241 | 1.32872E-14 | hslU | 0.602237913 | 0.037447144 |
| qseC | 0.336161971 | 0.001121274 | prc  | 0.605103803 | 0.015273474 |
| gnd  | 0.337118236 | 1.44117E-08 | nudC | 0.607731132 | 0.00179869  |
| yjbl | 0.33839456  | 3.70884E-15 | ihfA | 0.60932722  | 0.040000001 |
| yqaB | 0.339559667 | 9.12946E-06 | ypjM | 0.613172715 | 0.009228534 |
| sulA | 0.339570138 | 3.93771E-10 | hsrA | 0.618855647 | 0.013928004 |
| yfiK | 0.340819828 | 0.000707716 | alkA | 0.619640228 | 0.039729351 |
| yicL | 0.340842117 | 3.16853E-10 | hlpA | 0.62047431  | 0.006356242 |
| ibpB | 0.340848844 | 3.49457E-16 | amyA | 0.620694443 | 0.019452533 |
| narQ | 0.341373782 | 3.21473E-10 | npr  | 0.622159152 | 0.019245484 |
| ybdL | 0.341524049 | 6.95931E-11 | yahM | 0.622965327 | 0.013996766 |
| yfgL | 0.341756862 | 0.001024298 | miaA | 0.62630793  | 0.001775685 |
| ypdJ | 0.342190863 | 0.02893266  | ynfP | 0.628444939 | 0.038400033 |
| pstS | 0.342544478 | 3.42115E-10 | glyA | 0.641430808 | 0.035633401 |
| ybiS | 0.343146228 | 0.000336738 | ybbB | 0.643912412 | 0.028976392 |
| fhuB | 0.343374744 | 1.72547E-21 | nudC | 0.648991783 | 0.006053931 |
| yjeN | 0.343676699 | 4.10524E-08 | exuT | 0.653032224 | 0.011736812 |
| yciK | 0.344094701 | 3.31761E-08 | mpl  | 0.654522142 | 0.011491543 |
| yqjB | 0.34491264  | 7.82271E-09 | dam  | 0.65676536  | 0.038812809 |
| deoB | 0.345026839 | 1.24287E-08 | ydfV | 0.660367411 | 0.034578615 |
| yhjD | 0.345354002 | 1.42006E-12 | mrcA | 0.664266553 | 0.04904757  |
| ydeH | 0.345843355 | 6.27315E-11 | idnR | 0.664322295 | 0.020023175 |
| upp  | 0.350710525 | 1.6456E-10  | mraW | 0.664586179 | 0.0001213   |
| phnH | 0.351068581 | 2.50604E-15 | mraZ | 0.670402811 | 0.02370528  |
| yicC | 0.35244647  | 7.6657E-10  | yecP | 0.671751706 | 0.00433934  |
| yjeK | 0.354334237 | 1.52853E-08 | potD | 0.672981452 | 0.043154248 |

|      |             |             |      |             |             |
|------|-------------|-------------|------|-------------|-------------|
| yjgM | 0.354397862 | 2.33328E-05 | yrbG | 0.673370677 | 0.045494928 |
| hyfF | 0.355252015 | 1.49E-07    | pepN | 0.673648296 | 0.010516694 |
| ymgG | 0.357055524 | 3.70309E-06 | hupB | 0.675703402 | 0.029824075 |
| ycgY | 0.357445641 | 8.01951E-05 | osmY | 0.679477846 | 0.006180898 |
| ynfN | 0.357567594 | 2.39043E-12 | rusA | 0.679814686 | 0.045494928 |
| hupA | 0.358634908 | 2.98124E-17 | marA | 0.685249122 | 0.021282482 |
| intF | 0.358636883 | 1.83856E-12 | ihfB | 0.686543774 | 0.010516694 |
| prpE | 0.35951331  | 1.07214E-11 | yfcX | 0.687845791 | 0.028181773 |
| mutS | 0.359541869 | 5.3776E-13  | rbsR | 0.688059858 | 0.016378773 |
| fecD | 0.359712338 | 0.012993278 | ybbB | 0.688784486 | 0.017017106 |
| yfgL | 0.359959129 | 0.000686144 | sanA | 0.69203915  | 0.018647932 |
| ygfO | 0.36107676  | 8.41552E-06 | trpL | 0.694047562 | 0.045399624 |
| glk  | 0.361369861 | 2.40143E-09 | bcsA | 0.696021277 | 0.034378617 |
| cysP | 0.361516961 | 2.27706E-10 | mdtF | 0.698184676 | 0.027443936 |
| xdhD | 0.361565066 | 0.000166814 | hcaF | 0.705029131 | 0.028976392 |
| uhpA | 0.361715868 | 6.28307E-11 | mraZ | 0.710325471 | 0.016105547 |
| glgP | 0.364183557 | 6.28466E-10 | yhjR | 0.714139597 | 0.04512176  |
| deaD | 0.365051156 | 1.09269E-07 | tdk  | 0.71812064  | 0.031593364 |
| zupT | 0.365189939 | 2.12039E-11 | fimE | 0.722375476 | 0.034442764 |
| prfC | 0.366540214 | 0.007595385 | yjiY | 0.723112647 | 0.038812809 |
| yfdO | 0.366615921 | 6.7149E-08  | recJ | 0.731083992 | 0.013634429 |
| yejB | 0.366781594 | 3.50006E-07 |      |             |             |
| ycfS | 0.367467058 | 3.67145E-07 |      |             |             |
| araH | 0.367563268 | 0.00013068  |      |             |             |
| rpmJ | 0.368402666 | 0.000580551 |      |             |             |
| yibN | 0.369145435 | 1.81265E-07 |      |             |             |
| bcsB | 0.369786332 | 1.24207E-10 |      |             |             |
| pppA | 0.370588963 | 0.002669883 |      |             |             |
| atoB | 0.370663663 | 2.18986E-11 |      |             |             |
| yafP | 0.37140824  | 6.1352E-07  |      |             |             |
| yceH | 0.37219754  | 2.85148E-07 |      |             |             |
| yedV | 0.372831312 | 0.000130999 |      |             |             |
| thiE | 0.372921922 | 1.38905E-09 |      |             |             |
| yhjK | 0.373106286 | 2.38762E-13 |      |             |             |
| yjiJ | 0.373295423 | 4.8165E-11  |      |             |             |
| yhbG | 0.373901858 | 3.04365E-08 |      |             |             |
| rpmE | 0.375433486 | 1.57915E-05 |      |             |             |
| atpF | 0.37578502  | 0.002213974 |      |             |             |
| fis  | 0.375906865 | 5.7219E-09  |      |             |             |
| ygjN | 0.376436929 | 1.17762E-11 |      |             |             |
| ssnA | 0.376750977 | 0.013833113 |      |             |             |
| ycfM | 0.377081685 | 3.96765E-09 |      |             |             |
| xapA | 0.378459247 | 1.74819E-08 |      |             |             |
| tesB | 0.378884687 | 3.41242E-08 |      |             |             |
| ygeO | 0.379775443 | 1.48846E-09 |      |             |             |
| yfhM | 0.379907777 | 0.000205734 |      |             |             |

|      |             |             |
|------|-------------|-------------|
| dctA | 0.380568917 | 1.71828E-13 |
| cueO | 0.381149421 | 1.09197E-08 |
| nikE | 0.381240588 | 1.8192E-10  |
| yidX | 0.382612645 | 1.07977E-06 |
| dnaK | 0.383208204 | 0.01939729  |
| hisH | 0.384401272 | 3.35777E-06 |
| ygiU | 0.384847139 | 0.000531357 |
| argC | 0.386828479 | 4.36425E-09 |
| rfaH | 0.388261556 | 0.000574038 |
| ymjC | 0.388403812 | 5.43494E-05 |
| rfaZ | 0.388571585 | 4.38466E-10 |
| sapB | 0.388826913 | 6.45378E-06 |
| yohM | 0.390055533 | 3.31682E-06 |
| aqpZ | 0.391034273 | 7.06868E-08 |
| mdtE | 0.391787697 | 6.73132E-12 |
| yiaO | 0.391922647 | 7.78201E-10 |
| ylaC | 0.393283109 | 9.46711E-07 |
| yaaH | 0.39344148  | 1.19462E-16 |
| yegT | 0.39487804  | 3.66825E-13 |
| yjaG | 0.394944611 | 1.76992E-10 |
| spr  | 0.39542592  | 1.51478E-07 |
| ykgE | 0.396326743 | 1.20412E-08 |
| agaW | 0.396560589 | 1.31746E-09 |
| yffH | 0.396579432 | 1.99072E-09 |
| yjeO | 0.396795228 | 6.72521E-15 |
| eutL | 0.397099479 | 2.62729E-09 |
| livH | 0.397437621 | 2.63392E-06 |
| pspF | 0.398588035 | 2.31371E-09 |
| hofQ | 0.398957635 | 1.71828E-13 |
| ybiY | 0.39943664  | 0.002223461 |
| ybeM | 0.400281017 | 1.94613E-06 |
| yfiP | 0.40134368  | 2.51371E-11 |
| yacC | 0.401355995 | 1.2344E-06  |
| ycgZ | 0.401466859 | 2.62952E-05 |
| yciC | 0.401774012 | 3.1013E-05  |
| ompA | 0.402307289 | 0.010007039 |
| yghO | 0.402713316 | 4.81225E-06 |
| yneG | 0.402799632 | 6.27588E-06 |
| yaiA | 0.402835776 | 8.68067E-08 |
| yiaG | 0.402913952 | 9.00365E-10 |
| yliE | 0.403662144 | 2.21521E-08 |
| gss  | 0.403800955 | 1.01739E-08 |
| hyfB | 0.404119293 | 6.37788E-05 |
| dnaQ | 0.404537407 | 0.001872728 |
| mutY | 0.404929127 | 3.91888E-06 |
| ycdS | 0.406419704 | 1.58777E-06 |

|      |             |             |
|------|-------------|-------------|
| seqA | 0.40642334  | 3.15321E-09 |
| nudC | 0.406877901 | 8.0116E-08  |
| tktB | 0.406975651 | 3.91444E-08 |
| rseB | 0.407508282 | 8.40353E-06 |
| yhhL | 0.408255378 | 3.10553E-07 |
| yqeG | 0.410176171 | 1.76761E-08 |
| avtA | 0.410195304 | 1.45417E-08 |
| galU | 0.410361598 | 0.001987032 |
| nlpB | 0.410399482 | 1.55867E-06 |
| yedD | 0.410611813 | 5.89435E-05 |
| nadC | 0.410688519 | 5.38162E-07 |
| hcr  | 0.411230717 | 4.30156E-05 |
| ybhP | 0.41236042  | 7.91695E-08 |
| aroL | 0.412987455 | 2.19534E-10 |
| hcaC | 0.413655634 | 0.028575636 |
| pcnB | 0.414205241 | 3.10839E-10 |
| yahJ | 0.415351511 | 4.5844E-08  |
| yebN | 0.415599146 | 2.12501E-10 |
| maeB | 0.415739035 | 1.2427E-10  |
| rimM | 0.416013336 | 0.027002669 |
| ypfl | 0.416752335 | 2.82169E-07 |
| lit  | 0.417082228 | 1.66455E-08 |
| hlpA | 0.417315464 | 1.22033E-11 |
| ygiW | 0.418042884 | 5.59255E-05 |
| cynX | 0.418250058 | 2.11692E-07 |
| gmhB | 0.418539752 | 0.030799753 |
| hupA | 0.418735331 | 0.016955274 |
| ykfl | 0.419567075 | 6.08911E-05 |
| yiaB | 0.419868132 | 3.50061E-10 |
| ycbS | 0.420819094 | 1.41317E-09 |
| ynjH | 0.420985969 | 3.80893E-10 |
| ilvA | 0.421839454 | 3.89294E-08 |
| ydcl | 0.422015005 | 0.000258687 |
| pabC | 0.422942485 | 8.34921E-11 |
| yhhT | 0.423766209 | 1.92677E-05 |
| sufC | 0.424196744 | 2.01646E-07 |
| purR | 0.424244017 | 4.45015E-09 |
| ynjA | 0.425466765 | 3.29737E-05 |
| yjiX | 0.425572483 | 9.29069E-07 |
| rfaG | 0.426011536 | 0.002084342 |
| dacA | 0.426087489 | 0.001449703 |
| rssA | 0.426090477 | 8.45303E-05 |
| gutQ | 0.426989252 | 6.6548E-06  |
| rhtC | 0.427287697 | 2.57254E-08 |
| hofB | 0.429211893 | 5.58543E-09 |
| ybhT | 0.429257728 | 2.88928E-05 |

|      |             |             |
|------|-------------|-------------|
| uhpA | 0.429731813 | 4.29379E-10 |
| cspC | 0.431108133 | 0.000258687 |
| qor  | 0.431390586 | 0.000139453 |
| yjfM | 0.431545058 | 1.44382E-08 |
| yhjA | 0.431658571 | 2.35109E-07 |
| nrdH | 0.432379792 | 9.29663E-09 |
| maa  | 0.434440143 | 9.0845E-05  |
| yihS | 0.434612237 | 0.001369826 |
| yrbG | 0.435107907 | 8.67651E-08 |
| yicl | 0.435141909 | 4.64986E-06 |
| yfdY | 0.43549695  | 9.07426E-10 |
| yjiX | 0.435778119 | 9.50253E-08 |
| vacJ | 0.435919467 | 2.27245E-09 |
| cyoC | 0.436217579 | 0.000316919 |
| fabR | 0.436487394 | 0.000345051 |
| yaiZ | 0.437225188 | 4.26487E-05 |
| hofC | 0.437752675 | 1.17111E-11 |
| yidH | 0.438421111 | 2.67792E-11 |
| feaR | 0.439165122 | 2.61966E-09 |
| kptA | 0.439302662 | 0.000100671 |
| yecP | 0.43932912  | 9.5772E-09  |
| bgIA | 0.4396343   | 2.09311E-09 |
| rffD | 0.439903502 | 1.36855E-05 |
| xerC | 0.44033504  | 9.46924E-08 |
| mhpR | 0.440788515 | 2.62872E-10 |
| dsdA | 0.441545121 | 8.96148E-06 |
| yfhK | 0.442060053 | 0.000457171 |
| yoeA | 0.442191539 | 5.71357E-08 |
| ycfP | 0.442304476 | 1.4942E-09  |
| hslR | 0.44258067  | 8.00704E-10 |
| fbaB | 0.44311253  | 0.000673645 |
| yfcH | 0.443130409 | 7.19067E-08 |
| pdxK | 0.443815588 | 9.17735E-05 |
| cybB | 0.443865108 | 0.00967923  |
| gmhB | 0.44387779  | 0.007966419 |
| yfdX | 0.444155671 | 1.66188E-05 |
| dksA | 0.444218797 | 0.010349689 |
| yjiZ | 0.444332723 | 7.06408E-06 |
| kdsC | 0.444491721 | 3.39205E-09 |
| dhaR | 0.445507697 | 0.000421008 |
| rnhB | 0.445730531 | 5.24043E-10 |
| ydcQ | 0.445773214 | 0.000315905 |
| yjiH | 0.446214652 | 3.07067E-06 |
| ycjT | 0.446413409 | 0.008786771 |
| rfal | 0.446462593 | 2.39158E-08 |
| fabF | 0.447244775 | 9.44569E-05 |

|      |             |             |
|------|-------------|-------------|
| yfeA | 0.447314374 | 2.33253E-07 |
| ydhV | 0.447371879 | 1.90916E-06 |
| ynjF | 0.447685204 | 0.000112447 |
| trmH | 0.450049678 | 0.000331762 |
| uhpC | 0.450683779 | 1.79661E-06 |
| pykA | 0.450735067 | 8.189E-05   |
| mraW | 0.450826082 | 2.47847E-14 |
| yadN | 0.450878056 | 1.16533E-07 |
| ydgA | 0.451034042 | 0.012401192 |
| lldR | 0.451438829 | 0.004196845 |
| puuE | 0.451634648 | 2.42137E-11 |
| cls  | 0.451650249 | 1.38703E-07 |
| cpxR | 0.452092594 | 0.000294388 |
| pbl  | 0.452153162 | 2.42626E-06 |
| ydcH | 0.452951714 | 0.000170669 |
| paaB | 0.452997967 | 2.56969E-06 |
| hemF | 0.454032275 | 4.87826E-08 |
| rna  | 0.454136113 | 3.00821E-08 |
| yadH | 0.454506834 | 8.39015E-05 |
| ygcH | 0.456438102 | 5.96834E-10 |
| dinJ | 0.456604841 | 1.11324E-10 |
| mdtC | 0.456988325 | 7.43883E-05 |
| ycfF | 0.457637106 | 2.27628E-07 |
| pykF | 0.458026564 | 3.79349E-10 |
| phoE | 0.458030776 | 0.002876121 |
| nlpE | 0.458452544 | 0.00026404  |
| yeaA | 0.458796538 | 0.000170757 |
| ycgK | 0.458803463 | 0.000334998 |
| ydhQ | 0.459103892 | 3.82114E-08 |
| rtcR | 0.459110407 | 2.46622E-09 |
| ddlB | 0.45920271  | 9.37721E-09 |
| narW | 0.459720246 | 7.89432E-06 |
| yceB | 0.459785912 | 2.94764E-08 |
| acrR | 0.459894408 | 3.88328E-08 |
| ybgK | 0.460487674 | 1.0779E-05  |
| yifN | 0.460818161 | 5.03543E-07 |
| yphF | 0.461174349 | 3.9792E-06  |
| eutE | 0.461225685 | 0.001096546 |
| glk  | 0.461491356 | 0.000438518 |
| ybiR | 0.461497791 | 0.000738499 |
| yegW | 0.461582964 | 1.66777E-07 |
| degP | 0.462242919 | 0.014982217 |
| rnk  | 0.462339378 | 1.26842E-06 |
| mobB | 0.463262261 | 7.54543E-06 |
| fadL | 0.463734966 | 5.68439E-06 |
| yahG | 0.463739292 | 1.96787E-05 |

|      |             |             |
|------|-------------|-------------|
| uup  | 0.463937563 | 2.36953E-07 |
| ulaG | 0.464530759 | 1.08437E-10 |
| ycjY | 0.464836726 | 0.00409336  |
| vacJ | 0.465646943 | 7.24171E-05 |
| yfhH | 0.466134235 | 8.6564E-06  |
| hcaB | 0.46615893  | 1.17016E-06 |
| kduD | 0.466269063 | 0.01960928  |
| nagA | 0.466321346 | 1.35564E-05 |
| ybbO | 0.466464306 | 9.93297E-05 |
| ygjR | 0.466873446 | 0.000446676 |
| gltS | 0.467313948 | 3.38981E-05 |
| cysI | 0.467539283 | 0.000164102 |
| hokE | 0.468096728 | 0.007855716 |
| hlpA | 0.468541545 | 5.08235E-09 |
| glmM | 0.468582581 | 0.010451789 |
| emtA | 0.468663079 | 3.81589E-06 |
| mglA | 0.468924293 | 7.08007E-05 |
| yfbL | 0.469127333 | 7.10959E-06 |
| yfiF | 0.469709697 | 1.02662E-07 |
| narJ | 0.470161625 | 6.75425E-05 |
| fucA | 0.47072806  | 0.014500258 |
| puuA | 0.47084757  | 0.000177403 |
| dgoA | 0.470931557 | 0.001552352 |
| ubiH | 0.471041994 | 0.0030711   |
| yfcX | 0.47154847  | 1.5045E-06  |
| phoQ | 0.472002641 | 0.00063197  |
| mdoC | 0.472017214 | 7.08702E-08 |
| ybjT | 0.472228562 | 1.10608E-05 |
| hsdS | 0.472621869 | 2.21733E-06 |
| dppB | 0.472782222 | 5.10705E-09 |
| hcaR | 0.472979196 | 0.003816009 |
| yrfA | 0.473457983 | 4.01667E-06 |
| zitB | 0.473676243 | 2.98382E-08 |
| ypjC | 0.473706094 | 1.66777E-07 |
| ybiM | 0.473880526 | 2.57953E-06 |
| yafC | 0.473958785 | 1.92113E-05 |
| glnB | 0.474323484 | 0.001946355 |
| prlC | 0.474609228 | 0.000194125 |
| dsbC | 0.475350125 | 2.94793E-06 |
| ybbV | 0.475434428 | 1.48062E-07 |
| yliF | 0.475623533 | 0.004547685 |
| recJ | 0.47574787  | 5.92332E-10 |
| yhfA | 0.47608887  | 6.77621E-11 |
| ycgK | 0.476893208 | 0.002605025 |
| ydhU | 0.477210721 | 0.001083978 |
| yjiY | 0.477274389 | 0.000104833 |

|      |             |             |
|------|-------------|-------------|
| acrE | 0.477746905 | 3.82188E-08 |
| sseB | 0.477979391 | 9.48925E-05 |
| dicB | 0.478253324 | 0.000691691 |
| dgsA | 0.478346988 | 0.000312471 |
| trkA | 0.478644705 | 0.007102861 |
| ppk  | 0.47870951  | 0.001799158 |
| elaD | 0.478752906 | 0.004774313 |
| mdtA | 0.478899558 | 7.99792E-05 |
| ycjU | 0.479175204 | 0.005767997 |
| ycjX | 0.47938364  | 5.25016E-05 |
| sstT | 0.479591509 | 6.02776E-06 |
| metN | 0.479821393 | 9.52568E-06 |
| yqfE | 0.479909732 | 5.4514E-05  |
| puuC | 0.480231258 | 0.011021912 |
| hybB | 0.480329741 | 4.84986E-05 |
| qseC | 0.480423294 | 0.00032395  |
| phoR | 0.480611076 | 1.0133E-06  |
| yfjR | 0.480615929 | 1.06803E-05 |
| talA | 0.48064937  | 6.39192E-07 |
| atpF | 0.481003555 | 0.036627815 |
| ygeF | 0.481239585 | 4.28835E-05 |
| yfgC | 0.481733878 | 7.12558E-05 |
| yidF | 0.48186935  | 1.7034E-08  |
| ydiV | 0.481901958 | 0.002658009 |
| livH | 0.481972066 | 2.81073E-06 |
| ymcD | 0.482000957 | 0.000395372 |
| ynfO | 0.482350784 | 2.40989E-08 |
| viaU | 0.482460632 | 0.002569968 |
| ivy  | 0.482593616 | 9.03962E-08 |
| zitB | 0.483144827 | 0.000236709 |
| ilvE | 0.483279715 | 3.41122E-07 |
| ybiJ | 0.484429299 | 0.002874202 |
| yegH | 0.484675    | 4.11958E-05 |
| ybjH | 0.48560105  | 8.41013E-06 |
| ydeN | 0.486020054 | 6.51645E-06 |
| yaiL | 0.486030854 | 0.000270397 |
| ypjA | 0.486204366 | 1.28865E-05 |
| maeB | 0.486444489 | 2.92428E-05 |
| glcE | 0.486850614 | 0.010031269 |
| ybgE | 0.487036136 | 0.000204518 |
| yfcY | 0.487581628 | 8.06194E-09 |
| yfdH | 0.487702735 | 2.64544E-07 |
| rpoS | 0.488040588 | 6.91139E-08 |
| yjiG | 0.488143547 | 1.78936E-07 |
| yabP | 0.488202639 | 2.17646E-10 |
| minD | 0.488517884 | 1.43593E-06 |



|      |             |             |
|------|-------------|-------------|
| aroL | 0.489000417 | 5.64765E-05 |
| hyi  | 0.489043543 | 3.70841E-05 |
| ydiO | 0.489111948 | 0.026617143 |
| hsrA | 0.489420656 | 3.53236E-06 |
| yhdA | 0.489467217 | 8.17334E-07 |
| araG | 0.489593254 | 0.000126926 |
| ygcR | 0.49020567  | 1.99513E-05 |
| yrbB | 0.490328715 | 8.75192E-06 |
| rpmJ | 0.490329349 | 0.000912434 |
| csiR | 0.490479433 | 8.87531E-05 |
| yjgD | 0.490574279 | 4.93814E-06 |
| yjeK | 0.490880011 | 0.004351475 |
| rtcR | 0.491227491 | 2.89399E-06 |
| ynbB | 0.491393715 | 0.046525301 |
| gltI | 0.491461359 | 0.000241876 |
| oppF | 0.49173289  | 9.69024E-06 |
| ogt  | 0.491871097 | 3.1714E-06  |
| yaiX | 0.491917687 | 0.00395088  |
| cdaR | 0.492028807 | 1.88945E-08 |
| nirC | 0.492542265 | 3.33613E-06 |
| ygjF | 0.49260954  | 0.000489826 |
| guaD | 0.493058587 | 6.63482E-06 |
| phnC | 0.493247061 | 8.06601E-06 |
| yqiG | 0.49332814  | 0.000113212 |
| ychE | 0.494602219 | 9.97651E-05 |
| hrpA | 0.495065291 | 0.037685526 |
| nusB | 0.495116726 | 0.003281912 |
| emrE | 0.495406286 | 0.02180883  |
| ybgL | 0.49542638  | 1.24324E-05 |
| pdhR | 0.496529822 | 0.00057051  |
| dsbG | 0.496561621 | 0.00432031  |
| yedK | 0.496566259 | 0.002564122 |
| yaiW | 0.496652705 | 7.40704E-07 |
| ydcK | 0.496760848 | 3.32947E-07 |
| hyfC | 0.497295998 | 1.24249E-07 |
| ybiX | 0.497981837 | 5.77783E-07 |
| yfjT | 0.498356247 | 0.03145979  |
| phoQ | 0.4986566   | 0.004816779 |
| setB | 0.499113575 | 0.000898791 |
| ygbN | 0.499592796 | 6.31467E-05 |
| ydaL | 0.499845571 | 8.06461E-07 |
| bioB | 0.500145027 | 0.010835991 |
| ytfT | 0.500231996 | 0.010835991 |
| gldA | 0.500338911 | 5.44298E-07 |
| narQ | 0.500357038 | 1.64436E-06 |
| ccmG | 0.500673193 | 0.001324544 |

|      |             |             |
|------|-------------|-------------|
| gatC | 0.500674362 | 1.11593E-08 |
| ybcY | 0.500749539 | 0.000785635 |
| eutI | 0.500927757 | 5.98157E-08 |
| yjhA | 0.501018491 | 1.37517E-06 |
| pstS | 0.50108973  | 1.58404E-06 |
| ldcA | 0.501212224 | 7.64897E-07 |
| ltaE | 0.501226969 | 3.80643E-05 |
| cspB | 0.50185013  | 0.002479235 |
| galU | 0.501882486 | 0.049406618 |
| ydgD | 0.50226184  | 0.028148563 |
| smpA | 0.502267797 | 0.042710199 |
| ybhF | 0.502329011 | 1.2335E-05  |
| yhhH | 0.502631598 | 0.001436252 |
| yegT | 0.50267756  | 2.64904E-06 |
| oppC | 0.502896083 | 2.56255E-06 |
| yedZ | 0.503352634 | 0.000955501 |
| nlpD | 0.503374196 | 0.000147805 |
| yiaA | 0.503809466 | 2.35186E-05 |
| thiM | 0.503819873 | 0.003466224 |
| adiY | 0.504061386 | 0.029644819 |
| ykgH | 0.504196982 | 6.68763E-06 |
| yicS | 0.5043887   | 1.79197E-08 |
| sgcQ | 0.504443683 | 2.98518E-10 |
| mrcB | 0.504527961 | 0.001240647 |
| npr  | 0.504739714 | 2.19181E-08 |
| hcaD | 0.504889423 | 1.405E-06   |
| yjeM | 0.504895172 | 0.007854624 |
| ybhT | 0.505130811 | 9.07867E-08 |
| ygbA | 0.505838216 | 8.06552E-05 |
| priA | 0.50587179  | 0.012349804 |
| yihI | 0.506478931 | 0.021755364 |
| ldcC | 0.506785464 | 1.42492E-06 |
| cspB | 0.507210672 | 7.50974E-05 |
| yfjH | 0.507442975 | 5.56379E-06 |
| rnhA | 0.507919384 | 0.016146517 |
| pcnB | 0.50804479  | 0.000351093 |
| ydfZ | 0.508265721 | 0.002325873 |
| hisJ | 0.508335092 | 0.001416279 |
| ycdQ | 0.508372305 | 6.56411E-05 |
| dedA | 0.509193056 | 4.10948E-06 |
| ybjX | 0.510075631 | 0.004089194 |
| yidL | 0.510488825 | 4.26934E-09 |
| yedW | 0.510700189 | 0.00108937  |
| galS | 0.510825078 | 1.77903E-06 |
| gdhA | 0.510927013 | 7.25295E-05 |
| ydgH | 0.511562986 | 2.94793E-06 |

|      |             |             |
|------|-------------|-------------|
| yraM | 0.511667378 | 2.32141E-05 |
| ycfM | 0.511809673 | 0.000469155 |
| ylbH | 0.512202325 | 0.000767213 |
| caiA | 0.512563304 | 2.69048E-06 |
| yhfY | 0.512655753 | 0.009320629 |
| ybjR | 0.513106127 | 6.93824E-06 |
| hyfR | 0.513282033 | 0.002138586 |
| friC | 0.515907384 | 9.91417E-05 |
| fbaB | 0.515986548 | 9.17214E-08 |
| ypjA | 0.516015582 | 0.000243314 |
| yqgA | 0.516286179 | 0.000175634 |
| yjeJ | 0.516381234 | 9.38015E-07 |
| ygcW | 0.516792485 | 0.00011049  |
| hypE | 0.517026927 | 1.69337E-05 |
| xyfF | 0.517365616 | 0.000146644 |
| helD | 0.517964661 | 9.59774E-06 |
| yibG | 0.518097407 | 0.000130975 |
| yifO | 0.518183972 | 6.08489E-08 |
| ydhX | 0.518344934 | 6.13045E-05 |
| fixX | 0.518821571 | 6.93743E-06 |
| yfcZ | 0.518869306 | 0.001132186 |
| pfiB | 0.519212043 | 0.004142553 |
| fecl | 0.519275856 | 0.005439929 |
| pmbA | 0.519735878 | 0.000223943 |
| yciO | 0.520022589 | 0.000860778 |
| norW | 0.520048103 | 2.21557E-05 |
| ydjE | 0.520051123 | 0.002045561 |
| erfK | 0.520231504 | 0.016354717 |
| cspA | 0.520473785 | 0.000276381 |
| glxR | 0.520570479 | 0.002338078 |
| nikC | 0.520964781 | 5.24503E-05 |
| dhaL | 0.521141348 | 0.000107353 |
| betT | 0.52123454  | 2.48067E-07 |
| phoP | 0.521345597 | 0.000467572 |
| cspH | 0.521638121 | 0.005651225 |
| lysU | 0.521704673 | 2.91164E-06 |
| kch  | 0.522068303 | 1.02968E-06 |
| yegX | 0.522185372 | 0.001738239 |
| yiiQ | 0.522619294 | 0.001939299 |
| ccmF | 0.522659145 | 0.015510145 |
| rbsK | 0.523283942 | 0.003179913 |
| ybeU | 0.523294376 | 0.00873245  |
| topB | 0.52367956  | 9.59738E-05 |
| ykgG | 0.523704359 | 9.9607E-07  |
| norR | 0.524042755 | 0.000347315 |
| trkA | 0.524338427 | 0.002336169 |

|      |             |             |
|------|-------------|-------------|
| msrA | 0.524832874 | 5.6934E-08  |
| pck  | 0.524879092 | 0.02465881  |
| yfcJ | 0.524933211 | 0.026930992 |
| yciQ | 0.524945549 | 0.000241923 |
| tdcB | 0.524981364 | 0.020538129 |
| phnG | 0.525201262 | 3.8643E-05  |
| bgIX | 0.525217156 | 5.84958E-07 |
| yehB | 0.525248619 | 0.000653841 |
| ybiM | 0.525617883 | 0.000579664 |
| cpdA | 0.525645885 | 2.91805E-06 |
| ebgA | 0.525711895 | 0.000763156 |
| ygcB | 0.52637111  | 1.60928E-06 |
| cspC | 0.526565107 | 0.036930361 |
| yhiL | 0.52673207  | 0.000209891 |
| poxA | 0.527168733 | 0.004403926 |
| evgS | 0.527235996 | 0.032968363 |
| ydaS | 0.527747536 | 5.00059E-07 |
| ydcH | 0.527975348 | 0.019473579 |
| yrfB | 0.528226846 | 0.000101683 |
| glcC | 0.528269632 | 0.000699409 |
| cchA | 0.528512889 | 1.72805E-07 |
| ybfH | 0.528548091 | 0.000120823 |
| lrp  | 0.528568915 | 0.013632768 |
| dgoD | 0.528608081 | 0.008711224 |
| ykgC | 0.52937619  | 4.22481E-08 |
| dipZ | 0.529439312 | 0.000688783 |
| ykfl | 0.529591408 | 2.61417E-06 |
| yqeK | 0.529604317 | 0.000365848 |
| ykiB | 0.530098142 | 4.68431E-06 |
| ybfD | 0.530138197 | 5.01799E-05 |
| mrcB | 0.530228104 | 5.55141E-05 |
| yagL | 0.530469774 | 0.001782992 |
| rsuA | 0.530771779 | 0.0018275   |
| ycgV | 0.531129738 | 2.33258E-06 |
| pdxJ | 0.531496944 | 0.000393727 |
| trpE | 0.531625239 | 2.13557E-06 |
| queA | 0.531976525 | 0.000467572 |
| prpD | 0.532269021 | 0.020477724 |
| ppx  | 0.532390412 | 0.002795167 |
| slt  | 0.532417605 | 6.33281E-05 |
| mprA | 0.532676266 | 0.000189384 |
| eutC | 0.533300521 | 6.24004E-05 |
| pdxY | 0.533416454 | 0.000437869 |
| puuP | 0.53374143  | 9.14489E-05 |
| xyIR | 0.53420726  | 0.009015997 |
| ygaZ | 0.53446887  | 0.00015656  |

|      |             |             |
|------|-------------|-------------|
| yjjV | 0.53470467  | 8.65451E-06 |
| qseB | 0.535675214 | 0.000109365 |
| yedZ | 0.535747184 | 0.00044799  |
| rpoZ | 0.536139657 | 0.000282256 |
| yggX | 0.536221943 | 7.77437E-06 |
| exo  | 0.53625595  | 2.77834E-05 |
| cutC | 0.536638703 | 0.009712234 |
| rnhB | 0.53664765  | 0.000134226 |
| yafP | 0.536785078 | 0.000254931 |
| gidB | 0.536850064 | 0.000210066 |
| ypfE | 0.537106345 | 4.18546E-07 |
| yjbR | 0.537317035 | 3.53946E-05 |
| tdk  | 0.537850155 | 4.82744E-05 |
| cysA | 0.53794617  | 5.15983E-05 |
| bcsF | 0.538142563 | 1.68701E-07 |
| trkD | 0.538263361 | 0.001545248 |
| mtr  | 0.538295265 | 5.4029E-05  |
| sdaB | 0.538804962 | 6.28889E-05 |
| ygeQ | 0.539258472 | 0.00015594  |
| ndh  | 0.539684393 | 5.28576E-05 |
| yfbJ | 0.539801443 | 2.57058E-05 |
| cutA | 0.539812848 | 3.49428E-06 |
| mdaB | 0.539920281 | 5.15983E-05 |
| yceO | 0.540207795 | 5.02937E-05 |
| ydeA | 0.540369517 | 0.00922093  |
| yhhZ | 0.54042511  | 8.22409E-05 |
| yehL | 0.540528934 | 0.001008637 |
| ymjB | 0.540974644 | 0.001101874 |
| yhgG | 0.541111698 | 0.00967923  |
| ybbA | 0.541402292 | 5.30006E-05 |
| lysP | 0.541885672 | 3.029E-05   |
| ydcN | 0.542226417 | 0.002366049 |
| yfjO | 0.542286017 | 0.001424524 |
| yfiR | 0.542464459 | 0.001081618 |
| argF | 0.542511866 | 0.043943605 |
| ascG | 0.542938298 | 0.000898083 |
| arcA | 0.542983386 | 0.044199494 |
| ampD | 0.543379492 | 0.008298009 |
| nlpD | 0.543712271 | 0.007396075 |
| yphB | 0.544262533 | 1.16084E-05 |
| yiiG | 0.54429348  | 0.00015656  |
| yedV | 0.544572148 | 0.000767205 |
| crr  | 0.54460106  | 3.37164E-05 |
| hscC | 0.544908032 | 0.011039943 |
| pepN | 0.545137603 | 6.28266E-05 |
| mpl  | 0.545822672 | 6.47615E-06 |

|      |             |             |
|------|-------------|-------------|
| xapB | 0.545845722 | 0.000826519 |
| thiC | 0.545897818 | 0.034599538 |
| nikR | 0.546247301 | 0.006286734 |
| serA | 0.546530853 | 2.29613E-05 |
| yccF | 0.546908954 | 0.016477457 |
| cobB | 0.547350512 | 0.00069186  |
| rimK | 0.547716825 | 0.000474156 |
| yhjE | 0.547778221 | 0.004747378 |
| gltK | 0.547858252 | 0.000780312 |
| rng  | 0.547997465 | 0.000395092 |
| kbaZ | 0.548302106 | 0.000440307 |
| yaT  | 0.549049866 | 6.21616E-05 |
| yidG | 0.549625638 | 7.59806E-07 |
| yicE | 0.549875558 | 0.027084867 |
| yraP | 0.550081901 | 0.000190145 |
| mazG | 0.550377517 | 5.12023E-05 |
| thiP | 0.550922532 | 1.79764E-05 |
| ecpD | 0.551590451 | 3.72151E-07 |
| hcaD | 0.551839689 | 1.10692E-06 |
| proQ | 0.55200105  | 0.001282335 |
| ydel | 0.552113673 | 0.000126147 |
| yrbL | 0.552116522 | 0.00065653  |
| yneJ | 0.552550441 | 4.69507E-05 |
| ykiA | 0.553130407 | 0.000325278 |
| ybhF | 0.553559349 | 0.003253281 |
| ygeH | 0.553590319 | 0.002715573 |
| yjiD | 0.553669185 | 8.92325E-05 |
| yodA | 0.553816202 | 0.000867907 |
| proQ | 0.553993848 | 0.011220559 |
| yhiR | 0.554247477 | 0.000154411 |
| treF | 0.55437397  | 0.004714161 |
| yidI | 0.554576472 | 0.000119342 |
| ihfA | 0.55464662  | 0.007298105 |
| yfiL | 0.554917411 | 7.27529E-06 |
| cyaA | 0.555220627 | 0.000438431 |
| yghT | 0.555391021 | 0.043799059 |
| ymfB | 0.555392916 | 4.28815E-05 |
| bioA | 0.5554839   | 0.011688682 |
| cysW | 0.555532384 | 6.47468E-08 |
| yggF | 0.555644127 | 0.000744366 |
| yhiN | 0.555919388 | 2.39148E-05 |
| ybbC | 0.55602407  | 1.90831E-05 |
| ligB | 0.55650771  | 2.1689E-06  |
| pntA | 0.556885168 | 0.020137198 |
| tbpA | 0.557233784 | 6.13306E-05 |
| yhdU | 0.557728346 | 3.37636E-05 |

|      |             |             |
|------|-------------|-------------|
| yddL | 0.557889587 | 0.002406644 |
| sspB | 0.557920642 | 2.4979E-07  |
| yfhD | 0.557945905 | 0.017122648 |
| cobT | 0.557951771 | 0.001008417 |
| ypdH | 0.558207542 | 0.002302438 |
| thiF | 0.558581643 | 1.75659E-05 |
| yecT | 0.558908142 | 0.00076835  |
| ybgH | 0.559456999 | 0.00029336  |
| panD | 0.560568531 | 0.002224088 |
| fadD | 0.560635358 | 0.004977255 |
| ybfO | 0.560672968 | 0.015255464 |
| ykfA | 0.560798621 | 0.009644934 |
| yhiJ | 0.560865225 | 0.013543358 |
| ygaM | 0.561078968 | 0.000304792 |
| thrB | 0.561238103 | 7.0659E-06  |
| yjJK | 0.561261741 | 0.000648741 |
| yihN | 0.561382985 | 2.64396E-05 |
| yqaD | 0.56146789  | 1.82447E-05 |
| ybeU | 0.561822023 | 0.012495982 |
| ugpB | 0.561988119 | 0.001552352 |
| dkgB | 0.562348775 | 1.18874E-05 |
| yegP | 0.56293851  | 0.002781232 |
| btuR | 0.563310727 | 0.00013425  |
| ampE | 0.563692642 | 0.000125793 |
| ligT | 0.563905059 | 9.82123E-05 |
| yjbL | 0.564029526 | 0.001279619 |
| garP | 0.564306898 | 0.001909858 |
| yjhR | 0.564434562 | 0.001670841 |
| yhbE | 0.565051947 | 0.000286169 |
| cstA | 0.565151536 | 0.004392424 |
| yhhW | 0.565210088 | 6.33156E-06 |
| gcd  | 0.565266647 | 0.000183697 |
| recB | 0.565422309 | 0.02848019  |
| yhjK | 0.565533538 | 9.05722E-06 |
| htgA | 0.565652245 | 3.64937E-06 |
| nrdF | 0.565688643 | 0.001728067 |
| eutG | 0.565792603 | 1.74413E-05 |
| lyxK | 0.566086329 | 0.001121605 |
| bolA | 0.566099424 | 0.006982583 |
| yjhl | 0.566640745 | 0.003373378 |
| eaeH | 0.567038489 | 5.96491E-06 |
| ulaB | 0.567555024 | 0.024636749 |
| ligT | 0.567890611 | 0.002267037 |
| ydgl | 0.568068161 | 0.02070373  |
| yeaE | 0.568264354 | 0.00066412  |
| yaiZ | 0.568283496 | 0.018175052 |

|      |             |             |
|------|-------------|-------------|
| ptsG | 0.568527722 | 0.004674789 |
| amiA | 0.56871727  | 0.000378269 |
| yeal | 0.568900386 | 0.004097726 |
| bax  | 0.57011976  | 0.003749015 |
| deoA | 0.570152002 | 0.000494148 |
| arsR | 0.570796084 | 1.50542E-05 |
| yfeT | 0.571478001 | 0.000371966 |
| tsr  | 0.571491361 | 6.48509E-05 |
| smg  | 0.57174735  | 1.82447E-05 |
| ybbB | 0.571792987 | 0.000736564 |
| eptB | 0.572071496 | 1.65063E-05 |
| frwD | 0.572279951 | 0.000120214 |
| yfgH | 0.572302625 | 0.030527521 |
| ybcF | 0.572374524 | 0.018651019 |
| nemA | 0.572538434 | 0.000717064 |
| ygeY | 0.572823417 | 0.010451789 |
| ydjR | 0.573025808 | 0.000870035 |
| gloB | 0.573060878 | 0.000796482 |
| ydeE | 0.573295991 | 0.007593549 |
| yffB | 0.573662599 | 8.05344E-05 |
| idnK | 0.574054621 | 0.000256303 |
| cpxA | 0.574058405 | 0.04581999  |
| fiu  | 0.574130456 | 6.07286E-05 |
| ybiA | 0.574236921 | 0.000687662 |
| yidL | 0.574334127 | 5.63602E-06 |
| yjeS | 0.57455289  | 1.38775E-05 |
| melB | 0.575176234 | 0.002682827 |
| trmU | 0.57527656  | 0.013954644 |
| umuC | 0.57561759  | 0.000870615 |
| fimC | 0.575692574 | 0.000707418 |
| sufB | 0.575739245 | 0.048507596 |
| ydhR | 0.576052995 | 0.000114882 |
| rof  | 0.576428919 | 1.32333E-06 |
| rfaQ | 0.577392601 | 0.000445163 |
| yejA | 0.577449639 | 0.00021244  |
| gmd  | 0.577832288 | 2.58433E-05 |
| rbsR | 0.578281141 | 0.000577655 |
| ccmC | 0.579204949 | 0.00013068  |
| yraM | 0.57941191  | 0.000260767 |
| fumA | 0.579541222 | 0.031005272 |
| ypdA | 0.579574567 | 0.014213131 |
| citG | 0.579652747 | 0.002623203 |
| yggP | 0.580037844 | 0.012401192 |
| prfC | 0.580217737 | 0.000290492 |
| cdh  | 0.580622803 | 2.32329E-06 |
| ygfA | 0.580754056 | 0.029221581 |



|      |             |             |
|------|-------------|-------------|
| dppB | 0.580772329 | 0.000337674 |
| paaC | 0.580873108 | 0.000338277 |
| ycdG | 0.580926312 | 0.000596888 |
| dmsC | 0.581285873 | 0.017376737 |
| yohM | 0.581870553 | 0.000579664 |
| sufC | 0.5820256   | 0.000707716 |
| sapB | 0.582472932 | 0.017378392 |
| btuB | 0.582791115 | 0.009022656 |
| smg  | 0.582867952 | 0.000550447 |
| yobA | 0.58314915  | 6.58848E-05 |
| wbbK | 0.583256845 | 0.000137386 |
| nrdG | 0.583870145 | 0.000262601 |
| malQ | 0.583938875 | 0.035131516 |
| frlD | 0.583958965 | 5.95793E-06 |
| elbA | 0.583967543 | 0.001237369 |
| ygbM | 0.584289874 | 0.000380012 |
| ybhS | 0.584341119 | 0.001941139 |
| rbfA | 0.5843744   | 0.02848019  |
| ebgA | 0.5845128   | 0.000412091 |
| yjhX | 0.584522626 | 0.000101092 |
| livF | 0.585253491 | 0.036530481 |
| yehD | 0.585746677 | 0.031592774 |
| yegR | 0.585904571 | 0.001667316 |
| dgoR | 0.586168111 | 6.65434E-05 |
| yicS | 0.586238324 | 3.31875E-06 |
| potB | 0.58626737  | 0.011125717 |
| mdtF | 0.586488329 | 3.04085E-07 |
| yeiL | 0.58740323  | 0.000468874 |
| eutA | 0.587454783 | 4.6942E-06  |
| nikC | 0.587459847 | 0.000264215 |
| yaiT | 0.587747755 | 0.000254823 |
| mltC | 0.588024815 | 0.003074705 |
| ybfD | 0.588090655 | 0.019783281 |
| yicI | 0.588139205 | 3.83089E-05 |
| yehQ | 0.58843228  | 0.024384663 |
| ybgS | 0.588767163 | 0.000246871 |
| kdsC | 0.589162278 | 0.002106049 |
| ybbD | 0.589708045 | 8.44104E-05 |
| yfdM | 0.589792103 | 0.002106049 |
| ybhS | 0.590803422 | 0.000553732 |
| yjfY | 0.590900477 | 0.000246746 |
| aat  | 0.591570301 | 9.53818E-05 |
| ycdG | 0.591753192 | 0.045508159 |
| radA | 0.591773985 | 0.001118439 |
| yfjW | 0.591810663 | 0.001308788 |
| speE | 0.592326101 | 0.008767411 |

|      |             |             |
|------|-------------|-------------|
| ycaP | 0.592557732 | 7.70334E-05 |
| ykgI | 0.59271983  | 0.002207242 |
| csgE | 0.592729912 | 5.99466E-05 |
| talB | 0.592835426 | 0.000161647 |
| nagB | 0.592969268 | 0.030621547 |
| ypdF | 0.593065481 | 0.000286169 |
| bioC | 0.59312033  | 0.000887983 |
| yljI | 0.594085975 | 0.005799577 |
| envC | 0.594151284 | 0.032598559 |
| yqjK | 0.594225223 | 0.000699117 |
| emrY | 0.594475911 | 0.010229798 |
| yfjN | 0.594652787 | 0.001526205 |
| ygjQ | 0.595010991 | 0.001767305 |
| hycB | 0.595146215 | 0.000763495 |
| ygeP | 0.595184458 | 4.40865E-05 |
| torR | 0.59520865  | 0.000897147 |
| ypdB | 0.595232118 | 0.000824239 |
| ybaD | 0.595475669 | 0.002035508 |
| metA | 0.59589141  | 0.003345919 |
| puuP | 0.596093051 | 0.005379856 |
| hslV | 0.596133201 | 0.000885173 |
| yggL | 0.59652718  | 0.028131552 |
| nirD | 0.59681647  | 0.015790194 |
| ycdS | 0.597401423 | 0.007930283 |
| mhpC | 0.597672126 | 0.005059361 |
| yihO | 0.597796133 | 0.003675786 |
| ypfG | 0.5979989   | 0.000187054 |
| yibF | 0.598199891 | 0.000264215 |
| evgS | 0.598414899 | 0.020314888 |
| yrhA | 0.598654313 | 0.041358872 |
| rluB | 0.598727899 | 0.00953685  |
| ygiL | 0.59888807  | 0.00565558  |
| yrbF | 0.598928535 | 8.49189E-05 |
| ydiT | 0.59898621  | 0.025881588 |
| xthA | 0.59904699  | 0.006115801 |
| recD | 0.59939917  | 4.25755E-05 |
| fadR | 0.5995383   | 0.042685996 |
| dkgB | 0.599938964 | 0.00219066  |
| ybfF | 0.600365829 | 0.000946912 |
| rhaB | 0.600598306 | 0.023404797 |
| priC | 0.601214153 | 9.99709E-05 |
| flxA | 0.601485493 | 0.003916958 |
| narX | 0.601558495 | 0.011793915 |
| kdpB | 0.602231792 | 0.000574038 |
| ydjM | 0.602446779 | 0.000246871 |
| yajB | 0.602496358 | 0.009176681 |

|      |             |             |
|------|-------------|-------------|
| tsgA | 0.602616495 | 0.001713351 |
| ygcN | 0.6028077   | 0.000313329 |
| trmA | 0.603249404 | 0.000623767 |
| betA | 0.603294593 | 0.007859516 |
| ybeR | 0.603431433 | 0.000772916 |
| yliG | 0.60350246  | 0.037349262 |
| recG | 0.603634727 | 0.000689598 |
| yieM | 0.603799169 | 0.000117612 |
| hypB | 0.603985798 | 0.039232792 |
| hisF | 0.604001123 | 0.001981022 |
| fimE | 0.604481118 | 4.93671E-05 |
| ydjR | 0.604576602 | 0.027206038 |
| ydhR | 0.604660253 | 0.000747938 |
| hybD | 0.604721747 | 0.000193621 |
| ycfX | 0.605051309 | 0.009960643 |
| ampD | 0.605653504 | 0.001712657 |
| entA | 0.605680184 | 8.46809E-05 |
| fumB | 0.606339848 | 0.042744995 |
| yjhP | 0.606341553 | 0.000106139 |
| yjgI | 0.606437817 | 0.029657819 |
| aroP | 0.606502834 | 0.000361922 |
| htgA | 0.606668768 | 0.002080937 |
| yraN | 0.607470158 | 0.007904671 |
| phnK | 0.607627484 | 0.001021736 |
| yecN | 0.608036917 | 0.002218196 |
| ytfI | 0.608371218 | 0.046575294 |
| yjgN | 0.608408138 | 0.005216337 |
| ygbF | 0.608525841 | 2.9702E-05  |
| zraP | 0.608616129 | 0.00014325  |
| glcD | 0.608622341 | 0.032910812 |
| ndk  | 0.608687279 | 0.000813261 |
| yjiK | 0.608700268 | 0.005920381 |
| php  | 0.609027177 | 0.008465084 |
| yfaW | 0.609428155 | 0.000169794 |
| yehH | 0.609482935 | 0.007396322 |
| sapD | 0.60994134  | 0.010093068 |
| frlB | 0.610041203 | 0.001848866 |
| djlA | 0.610414135 | 7.30525E-06 |
| ypfH | 0.610478577 | 0.047678593 |
| yehQ | 0.6106607   | 0.000339903 |
| yeaH | 0.610792804 | 0.00012166  |
| dsdA | 0.610805474 | 0.00713554  |
| glnL | 0.611355016 | 3.2532E-05  |
| cysK | 0.611474248 | 0.007962831 |
| yehG | 0.611605625 | 0.000161973 |
| torZ | 0.611720507 | 0.000126698 |

|      |             |             |
|------|-------------|-------------|
| nth  | 0.612042213 | 0.007015129 |
| fumA | 0.612279095 | 0.035131516 |
| mppA | 0.612373535 | 0.00934239  |
| inaA | 0.613011691 | 0.028148563 |
| yfjZ | 0.613089981 | 0.007282853 |
| yphC | 0.61309298  | 0.000433546 |
| idnD | 0.613846409 | 0.000264215 |
| ykgL | 0.614136297 | 0.032802879 |
| yjhG | 0.61444643  | 0.000424477 |
| dcd  | 0.61483031  | 0.008588051 |
| ihfA | 0.614856817 | 0.001282813 |
| yncA | 0.614912937 | 0.002982097 |
| yfeA | 0.615049447 | 0.002885229 |
| uxaA | 0.615383956 | 0.001307263 |
| codA | 0.616057039 | 0.000362553 |
| araE | 0.616162526 | 0.009201979 |
| rumB | 0.616452113 | 0.015281211 |
| speC | 0.616767597 | 0.000857695 |
| yahL | 0.617171533 | 0.007629036 |
| yejE | 0.617333218 | 0.000498559 |
| yrhB | 0.617369832 | 0.003066249 |
| viaU | 0.617562453 | 0.005595645 |
| yceG | 0.617585265 | 0.034687443 |
| artQ | 0.617853523 | 0.005875249 |
| ebgC | 0.618139767 | 0.003921782 |
| ygbN | 0.61829471  | 0.009326989 |
| hisP | 0.61831284  | 0.000679085 |
| yeaY | 0.61859935  | 0.030357033 |
| yphD | 0.618682548 | 0.000686089 |
| ybgl | 0.618820968 | 0.000934786 |
| yhiP | 0.619182001 | 0.000707689 |
| yrbD | 0.619419022 | 0.015462466 |
| intB | 0.619577282 | 0.000313273 |
| hslV | 0.619799657 | 0.008787929 |
| helD | 0.620289149 | 0.003289933 |
| ygeK | 0.620708967 | 0.013057699 |
| yieN | 0.621043153 | 8.60213E-05 |
| eutP | 0.62134754  | 0.002522883 |
| yeiQ | 0.621400285 | 0.001425657 |
| ymgB | 0.622359921 | 0.015281211 |
| polB | 0.622496598 | 0.000168578 |
| yhdJ | 0.622646761 | 0.005371967 |
| arsR | 0.62296202  | 0.005320212 |
| btuF | 0.623056319 | 0.002841145 |
| focB | 0.623159146 | 0.001692111 |
| serC | 0.623238927 | 0.011924336 |

|      |             |             |
|------|-------------|-------------|
| hyfF | 0.623427805 | 0.001301984 |
| yacl | 0.623564877 | 0.019795542 |
| yhcN | 0.623868483 | 0.000628404 |
| ytfe | 0.623977627 | 0.025117737 |
| hisH | 0.624307383 | 0.012585021 |
| metN | 0.624433054 | 0.005820908 |
| ilvY | 0.624570121 | 0.000292728 |
| smf  | 0.624916151 | 0.00010466  |
| icdC | 0.625126119 | 0.000545887 |
| ybiW | 0.625127537 | 0.001885106 |
| ycaO | 0.625422874 | 0.002619997 |
| ibpA | 0.625607556 | 0.044079254 |
| ycfS | 0.625671443 | 0.000426927 |
| ddlA | 0.625766827 | 0.024173685 |
| yhhF | 0.626155687 | 0.010970025 |
| yihP | 0.626542327 | 0.004807956 |
| csgF | 0.626932582 | 0.010143452 |
| ynfL | 0.627426137 | 0.013729094 |
| pfkB | 0.627485824 | 0.003261645 |
| fucP | 0.627657927 | 0.005568408 |
| ychM | 0.627662017 | 0.006225639 |
| wza  | 0.627954715 | 0.002251967 |
| dcuR | 0.627984731 | 0.004342875 |
| citX | 0.628054831 | 0.022848983 |
| glf  | 0.628236095 | 0.027953735 |
| fieF | 0.628341997 | 0.019211428 |
| yegV | 0.628441496 | 0.010512626 |
| ydfU | 0.628461133 | 0.016350312 |
| yhdE | 0.628537117 | 0.00167737  |
| dppC | 0.628732737 | 0.000865848 |
| livJ | 0.629233461 | 0.010646714 |
| entE | 0.629387253 | 0.000409773 |
| ilvA | 0.62943601  | 0.001648842 |
| yfdX | 0.629943967 | 0.006192566 |
| yhaC | 0.630298996 | 0.000555411 |
| ampG | 0.630790612 | 0.002473003 |
| yeeJ | 0.630851735 | 0.015565132 |
| cobT | 0.631080903 | 0.004370597 |
| ycgN | 0.631392756 | 0.002302488 |
| uspE | 0.631945374 | 0.009652709 |
| rhaD | 0.632017505 | 0.003306854 |
| abgB | 0.632528123 | 0.002091102 |
| ynhG | 0.632798652 | 0.009939634 |
| yfcQ | 0.632833771 | 0.002674907 |
| yghS | 0.632892176 | 0.002135664 |
| crr  | 0.633006418 | 0.003253281 |

|      |             |             |
|------|-------------|-------------|
| gadW | 0.633269609 | 0.000396679 |
| ygaV | 0.633620262 | 0.014637575 |
| hydN | 0.633856688 | 5.65806E-05 |
| yjhS | 0.634551175 | 0.020067514 |
| prfH | 0.634976849 | 0.000816426 |
| pspF | 0.635135188 | 0.007733602 |
| ybdR | 0.636029272 | 0.00055595  |
| sfmC | 0.636221115 | 0.020238285 |
| ymfE | 0.636305053 | 0.008790399 |
| ybbB | 0.636400701 | 0.000177243 |
| spr  | 0.636691176 | 0.047093786 |
| yahD | 0.636900775 | 0.002786375 |
| feoA | 0.63729645  | 0.027585811 |
| nagD | 0.637423817 | 0.000234581 |
| yciG | 0.637522588 | 0.000614569 |
| ihfB | 0.637543896 | 0.003325861 |
| yggM | 0.637652494 | 0.010633062 |
| yieG | 0.638264735 | 0.000435673 |
| aidB | 0.638296981 | 0.007187782 |
| mdtE | 0.638305642 | 0.04436093  |
| yohL | 0.638511627 | 0.001831222 |
| glpD | 0.638765263 | 0.012622599 |
| ycjF | 0.638794484 | 0.001529812 |
| yhiQ | 0.639100573 | 0.008442266 |
| dppA | 0.63912175  | 0.025857351 |
| yeiP | 0.639123882 | 0.023680377 |
| ymgF | 0.639129852 | 0.014743415 |
| sgbE | 0.639315079 | 0.008491381 |
| cspA | 0.639380962 | 0.000578029 |
| deoD | 0.639433979 | 0.026663059 |
| yciE | 0.639617685 | 0.013299084 |
| ppiA | 0.639794898 | 0.000446503 |
| yegS | 0.63985665  | 0.030336029 |
| pstB | 0.640029052 | 0.025653847 |
| btuD | 0.640057032 | 0.000622022 |
| ygdB | 0.640112545 | 0.000243489 |
| yaiP | 0.640124843 | 0.00311669  |
| folM | 0.640367313 | 0.010071049 |
| yhbE | 0.640380794 | 0.000837226 |
| yfdC | 0.640860369 | 0.001848975 |
| yraJ | 0.640958733 | 0.007063243 |
| glvB | 0.640991314 | 0.000446676 |
| yjff | 0.641449976 | 0.04442194  |
| hycG | 0.641450881 | 0.009671201 |
| cadB | 0.641515168 | 0.012907074 |
| nuoG | 0.641909115 | 0.01497733  |

|      |             |             |
|------|-------------|-------------|
| mhpA | 0.642615254 | 0.0003741   |
| yrbC | 0.642815829 | 0.001301831 |
| yajI | 0.643005477 | 0.005059361 |
| holE | 0.64362426  | 0.011851797 |
| asnB | 0.643735347 | 0.000742374 |
| cynX | 0.644050675 | 0.005824702 |
| yadL | 0.64440804  | 0.003835159 |
| yfcD | 0.644452869 | 0.000638289 |
| glgC | 0.644524193 | 0.005133631 |
| ygeF | 0.64461781  | 0.002096148 |
| yicO | 0.644951184 | 0.0050175   |
| ampH | 0.644984102 | 0.00458817  |
| ybfE | 0.645190162 | 0.029795948 |
| gspA | 0.64554987  | 0.005410412 |
| yciB | 0.645677046 | 0.036062117 |
| yeeY | 0.64579731  | 0.002569968 |
| yehA | 0.646188866 | 0.046300603 |
| prpR | 0.646366833 | 0.000206537 |
| yigL | 0.64639727  | 0.002972205 |
| rhaR | 0.646610151 | 0.012054884 |
| yhhJ | 0.646803227 | 0.000700092 |
| macA | 0.646887063 | 0.02237016  |
| clpA | 0.646918278 | 0.002938857 |
| tdcG | 0.647010631 | 0.027412182 |
| fabR | 0.647316705 | 0.00340054  |
| glcE | 0.647705121 | 0.017756838 |
| tauD | 0.648303369 | 0.001492858 |
| ygbE | 0.64838573  | 0.002096148 |
| tfaD | 0.648413675 | 0.01213459  |
| yddH | 0.648512226 | 0.022156088 |
| aldB | 0.648669714 | 0.003417367 |
| yheL | 0.649037227 | 0.020438761 |
| xthA | 0.64931006  | 0.00463369  |
| ygcW | 0.649702595 | 0.005743463 |
| ybgJ | 0.650151956 | 0.000808072 |
| ybeM | 0.650322495 | 0.010071049 |
| yjhT | 0.65066028  | 0.012491605 |
| htrC | 0.650663285 | 0.019655472 |
| purN | 0.650701924 | 0.01642579  |
| proA | 0.650785473 | 0.038138745 |
| uidB | 0.650905822 | 0.001959223 |
| ygfI | 0.651046082 | 0.002837006 |
| ygcU | 0.651283078 | 0.006259078 |
| ybfA | 0.65156482  | 0.001468414 |
| yeiN | 0.652170532 | 0.001061666 |
| hypC | 0.65245773  | 0.019679208 |

|      |             |             |
|------|-------------|-------------|
| soxS | 0.652464465 | 0.006900469 |
| narY | 0.652655332 | 0.026617143 |
| ivy  | 0.65283383  | 0.037265875 |
| hycB | 0.652977178 | 0.000118848 |
| ybgJ | 0.653035098 | 0.038653519 |
| sgbU | 0.653491523 | 0.016965238 |
| nfsA | 0.653697825 | 0.020687064 |
| pyrD | 0.65381564  | 0.015474038 |
| smpB | 0.653861346 | 0.009709596 |
| ymgF | 0.654130407 | 0.002786672 |
| poxA | 0.65414278  | 0.037145907 |
| yohH | 0.654825668 | 0.002085588 |
| ansB | 0.654988125 | 0.017527026 |
| ucpA | 0.655120022 | 0.0113274   |
| ygiQ | 0.655158871 | 0.008698907 |
| yfdZ | 0.655235721 | 0.015682195 |
| ybbO | 0.655437943 | 0.008866139 |
| cmtB | 0.655548873 | 0.002399883 |
| ygfS | 0.65561314  | 0.013418166 |
| ygeG | 0.65597785  | 0.024981437 |
| yajR | 0.656989437 | 0.023787688 |
| hisQ | 0.657194088 | 0.015586179 |
| yaiY | 0.65764562  | 0.025250653 |
| fumC | 0.657682493 | 0.022110524 |
| ybjL | 0.658170849 | 0.030872081 |
| yfiA | 0.658234885 | 0.004148016 |
| ycaL | 0.658236495 | 0.002012835 |
| ybcS | 0.658293047 | 0.002629138 |
| yejL | 0.658315037 | 0.003355541 |
| yjjP | 0.658539506 | 0.02304947  |
| hha  | 0.658759745 | 0.010084763 |
| yehC | 0.659326168 | 0.001305531 |
| metF | 0.659815815 | 0.002255687 |
| phoR | 0.659893946 | 0.049741679 |
| dedD | 0.660089902 | 0.014016482 |
| uxaC | 0.660327893 | 0.035510249 |
| minD | 0.660486334 | 0.034599538 |
| yafS | 0.660563025 | 0.038788237 |
| fdnI | 0.660573407 | 0.045448378 |
| yciN | 0.662303615 | 0.045161467 |
| allA | 0.66263769  | 0.001479597 |
| yraR | 0.662951898 | 0.003351314 |
| yjeO | 0.662993913 | 0.045147197 |
| yjhH | 0.663040928 | 0.007896929 |
| ydgH | 0.663261612 | 0.004084428 |
| ydfD | 0.663788145 | 0.006380444 |



|      |             |             |
|------|-------------|-------------|
| yjiG | 0.664053116 | 0.001376568 |
| yjhV | 0.66423191  | 0.016499782 |
| fimA | 0.664354632 | 0.008371025 |
| edd  | 0.664586092 | 0.005331244 |
| ycdL | 0.664680148 | 0.008588051 |
| yohN | 0.664705743 | 0.003828881 |
| yhaL | 0.664798381 | 0.031891645 |
| baeS | 0.664872685 | 0.026617143 |
| narH | 0.66550523  | 0.009351289 |
| phoE | 0.665820108 | 0.008787929 |
| yfeY | 0.665894612 | 0.010744709 |
| ybfC | 0.666022948 | 0.003813295 |
| ymjB | 0.666350575 | 0.007160422 |
| kdpA | 0.667026977 | 0.020858118 |
| yccK | 0.667324016 | 0.031903793 |
| ybaA | 0.667341774 | 0.014906127 |
| yfcP | 0.667611677 | 0.007442865 |
| yhcD | 0.668093009 | 0.010916352 |
| eutC | 0.668324951 | 0.029795948 |
| mraZ | 0.668803287 | 0.007363587 |
| ynfD | 0.669001028 | 0.016185028 |
| ycil | 0.669230424 | 0.018994685 |
| entB | 0.669635552 | 0.002913845 |
| hisC | 0.669736136 | 0.04218569  |
| yaaA | 0.669911359 | 0.000308326 |
| fimB | 0.670314542 | 0.01087375  |
| ycaD | 0.670668154 | 0.030714311 |
| yjhB | 0.67087393  | 0.001831222 |
| rfaQ | 0.670916841 | 0.004714161 |
| rbsR | 0.671398718 | 0.001351033 |
| yjgZ | 0.671503449 | 0.04856617  |
| recG | 0.671540759 | 0.00940682  |
| evgA | 0.672056808 | 0.024048195 |
| ycgL | 0.672397505 | 0.003355541 |
| torI | 0.673285427 | 0.003777707 |
| yahB | 0.673381601 | 0.003306854 |
| yciV | 0.673398116 | 0.003574935 |
| yagY | 0.673416544 | 0.005942952 |
| dcd  | 0.673681077 | 0.016319329 |
| yahO | 0.675140317 | 0.013859442 |
| recE | 0.675172621 | 0.030150888 |
| ybaL | 0.67520272  | 0.024141294 |
| gor  | 0.675671746 | 0.038268225 |
| argG | 0.675849099 | 0.000537183 |
| yoaA | 0.675986153 | 0.030123581 |
| ydfV | 0.676192941 | 0.003896598 |

|      |             |             |
|------|-------------|-------------|
| yfiC | 0.67639192  | 0.002468389 |
| bioA | 0.676443461 | 0.025367101 |
| yajO | 0.676501825 | 0.010451789 |
| ymcB | 0.676539843 | 0.004498126 |
| ycdL | 0.676765207 | 0.033104992 |
| yqeB | 0.6770231   | 0.023462771 |
| mlrA | 0.678119023 | 0.010451789 |
| ydgl | 0.678314964 | 0.0139423   |
| spy  | 0.678586102 | 0.026235589 |
| tauC | 0.678730777 | 0.037626927 |
| ygyF | 0.678985934 | 0.013329132 |
| wzzE | 0.679052259 | 0.015303373 |
| yfiC | 0.679169984 | 0.022398575 |
| yciK | 0.679369951 | 0.003618669 |
| gatY | 0.679436636 | 0.007812064 |
| yjhQ | 0.679561666 | 0.010936903 |
| yhfG | 0.680158571 | 0.010169891 |
| yihG | 0.680188804 | 0.00463369  |
| ybfP | 0.680470949 | 0.020374842 |
| thiG | 0.680548703 | 0.012159943 |
| pabA | 0.680747186 | 0.00426277  |
| ygdR | 0.681761631 | 0.011936568 |
| ybil | 0.681897946 | 0.010129513 |
| yhaH | 0.682132    | 0.026412824 |
| ygcl | 0.682386384 | 0.004757337 |
| gntX | 0.683138172 | 0.005479266 |
| yjgZ | 0.683965953 | 0.005890958 |
| pfkB | 0.683969031 | 0.017626521 |
| pfIB | 0.684271982 | 0.030793006 |
| yidI | 0.684592164 | 0.001063381 |
| yhdX | 0.684916152 | 0.006182239 |
| frlR | 0.685025772 | 0.015487716 |
| kdpA | 0.685179234 | 0.035753017 |
| yhfW | 0.685353279 | 0.00638323  |
| fdnH | 0.685949336 | 0.02064984  |
| argG | 0.686518689 | 0.006417501 |
| ygch | 0.686529287 | 0.020169534 |
| yegD | 0.686734322 | 0.039644163 |
| ycfR | 0.688554786 | 0.024364848 |
| mtgA | 0.688750165 | 0.011192502 |
| menB | 0.688752255 | 0.0363935   |
| basR | 0.689190663 | 0.015770519 |
| yohF | 0.689356708 | 0.018674287 |
| glkK | 0.689498751 | 0.005034411 |
| yehZ | 0.68965747  | 0.026441521 |
| ybjQ | 0.689711654 | 0.028435537 |

|      |             |             |
|------|-------------|-------------|
| ddpB | 0.689861535 | 0.024273295 |
| ygaX | 0.689921763 | 0.002777702 |
| gph  | 0.68994942  | 0.00524788  |
| marA | 0.690445623 | 0.037706813 |
| ynjC | 0.690586415 | 0.020906332 |
| csdA | 0.690870917 | 0.007637015 |
| ycdB | 0.691071388 | 0.04706169  |
| yfcN | 0.691633757 | 0.000943885 |
| rumB | 0.692006048 | 0.013688913 |
| cusA | 0.692301363 | 0.019089093 |
| ycfL | 0.693108987 | 0.005888288 |
| manZ | 0.693215133 | 0.037729039 |
| uidC | 0.6932691   | 0.026070731 |
| yhdL | 0.693608994 | 0.037826655 |
| ybjJ | 0.693769295 | 0.033480027 |
| entA | 0.693784071 | 0.005430713 |
| yfeG | 0.694783478 | 0.037872811 |
| sgrR | 0.694793489 | 0.001474652 |
| yjgD | 0.6948907   | 0.013065811 |
| fecC | 0.695340681 | 0.017586709 |
| ycbU | 0.695657589 | 0.028070921 |
| ydfV | 0.69571424  | 0.036660954 |
| sgcB | 0.695732582 | 0.013976372 |
| ymcC | 0.695851285 | 0.032622839 |
| ybjE | 0.696493363 | 0.034589454 |
| sgcX | 0.696553979 | 0.025470011 |
| yeiP | 0.696559691 | 0.023008497 |
| yqgC | 0.697865013 | 0.015833833 |
| ycbS | 0.698283944 | 0.021228518 |
| ygiE | 0.698301777 | 0.01471261  |
| yrfC | 0.698313022 | 0.036429756 |
| ykgF | 0.698476964 | 0.007747518 |
| ykgI | 0.699637442 | 0.024364848 |
| yagV | 0.700231709 | 0.010819092 |
| yfdC | 0.700484526 | 0.016173214 |
| trpR | 0.700502447 | 0.048562192 |
| ydiD | 0.700591311 | 0.042063608 |
| bcsZ | 0.700642712 | 0.02071606  |
| tauA | 0.700670023 | 0.041787485 |
| dppC | 0.700675773 | 0.018027793 |
| pepP | 0.701453424 | 0.029214309 |
| yadC | 0.702086539 | 0.016003751 |
| hha  | 0.702166528 | 0.012167802 |
| yedM | 0.7026527   | 0.035848777 |
| trpD | 0.702927255 | 0.009457978 |
| yafU | 0.703976136 | 0.022322049 |

|      |             |             |
|------|-------------|-------------|
| panC | 0.704249123 | 0.029795948 |
| yqcB | 0.704256355 | 0.016456764 |
| dtd  | 0.705753724 | 0.011199663 |
| fucO | 0.705938188 | 0.027956687 |
| sgbH | 0.706496008 | 0.010071049 |
| yehU | 0.706741707 | 0.008767411 |
| rbbA | 0.707689755 | 0.014743415 |
| ygck | 0.707845216 | 0.013047505 |
| yajO | 0.708467949 | 0.033772958 |
| yibH | 0.708673755 | 0.049067389 |
| fpr  | 0.709288049 | 0.010970025 |
| yhiK | 0.709742104 | 0.024645726 |
| yghO | 0.709931124 | 0.04632642  |
| galS | 0.71005454  | 0.03398454  |
| yhbX | 0.710603755 | 0.007065737 |
| yecJ | 0.710609862 | 0.030478092 |
| phnD | 0.710853548 | 0.03522679  |
| pbpG | 0.711042826 | 0.023316041 |
| ccmE | 0.711471367 | 0.033660058 |
| surE | 0.711549414 | 0.041290921 |
| argO | 0.714643835 | 0.007836057 |
| pstA | 0.714847762 | 0.048854193 |
| dmsB | 0.714995976 | 0.04428335  |
| ybcJ | 0.71582958  | 0.042801142 |
| iscR | 0.716011633 | 0.011394901 |
| chaA | 0.716086162 | 0.039522895 |
| rplI | 0.716474061 | 0.03187193  |
| ymfA | 0.716934118 | 0.02597643  |
| yehM | 0.718518923 | 0.04633047  |
| ygbF | 0.718822509 | 0.028369199 |
| acrF | 0.719268895 | 0.037636632 |
| yohJ | 0.719295478 | 0.03417915  |
| yccS | 0.719740855 | 0.009867028 |
| ybil | 0.720235037 | 0.031036463 |
| treF | 0.720766437 | 0.014239422 |
| asnA | 0.720803584 | 0.022253709 |
| ymjA | 0.721416082 | 0.030534999 |
| ybaS | 0.722435094 | 0.040114579 |
| ybiH | 0.722516333 | 0.011936568 |
| smf  | 0.722663616 | 0.011570375 |
| malY | 0.723607385 | 0.043680487 |
| aldB | 0.723802464 | 0.033126957 |
| fimZ | 0.723850985 | 0.024973994 |
| uvrB | 0.724183677 | 0.049660243 |
| mfd  | 0.726419524 | 0.044764578 |
| ydiZ | 0.726889381 | 0.023094642 |

|      |             |             |
|------|-------------|-------------|
| exoX | 0.727041252 | 0.022318745 |
| ygfB | 0.727140895 | 0.047259379 |
| torR | 0.727571275 | 0.039298426 |
| csiR | 0.728091515 | 0.049337166 |
| yagZ | 0.728325171 | 0.042621289 |
| psiF | 0.728535779 | 0.031123789 |
| kdul | 0.730944319 | 0.033438579 |
| ygeX | 0.730995335 | 0.01828816  |
| yehD | 0.731881226 | 0.015250424 |
| yjfZ | 0.732607436 | 0.047515274 |
| fecl | 0.732858057 | 0.027260509 |
| nlpA | 0.733027573 | 0.007889877 |
| yfcG | 0.734111518 | 0.038300346 |
| panD | 0.734523812 | 0.018953687 |
| ynjB | 0.734835975 | 0.026404546 |
| hflK | 0.735167698 | 0.02262494  |
| yicN | 0.735971581 | 0.018808148 |
| bgIH | 0.736414011 | 0.040894421 |
| yhhL | 0.736862545 | 0.042251195 |
| asnC | 0.737095956 | 0.01678262  |
| ydfE | 0.739586295 | 0.032151134 |
| ygfM | 0.74047214  | 0.047770984 |
| tas  | 0.74086506  | 0.037598755 |
| fdhD | 0.741786559 | 0.037205995 |
| artJ | 0.741868684 | 0.028969032 |
| yjiY | 0.74208188  | 0.034104428 |
| mpl  | 0.744903862 | 0.037291569 |
| viaO | 0.74564567  | 0.018354438 |
| yeiM | 0.745978952 | 0.026510989 |
| yhfX | 0.74624758  | 0.020499786 |
| yieM | 0.746790874 | 0.020947211 |
| cytR | 0.746883988 | 0.036644458 |
| leuD | 0.747067325 | 0.026617143 |
| uspA | 0.747912098 | 0.047962984 |
| garR | 0.749279055 | 0.045946196 |
| viaV | 0.751378631 | 0.026592708 |
| yaeQ | 0.751597376 | 0.028397591 |
| hdeD | 0.752125951 | 0.013408303 |
| yedW | 0.75427889  | 0.040848093 |
| yfeW | 0.757074869 | 0.033156239 |
| dsdX | 0.757558276 | 0.048773171 |
| ompT | 0.757854736 | 0.044645903 |
| rLuA | 0.757856135 | 0.021720306 |
| alsC | 0.759698072 | 0.037257274 |
| gph  | 0.76250272  | 0.022875999 |
| yieG | 0.764242681 | 0.042817347 |

|      |             |             |
|------|-------------|-------------|
| miaB | 0.76561001  | 0.047782431 |
| yhdE | 0.765836962 | 0.049273294 |
| yrbD | 0.767930594 | 0.010851273 |
| yohK | 0.768168159 | 0.03261309  |
| yhdY | 0.770870828 | 0.039585614 |
| creC | 0.775061947 | 0.041206656 |
| viaW | 0.775539655 | 0.021251796 |
| yhdY | 0.776226132 | 0.039111929 |
| yijF | 0.776295913 | 0.040900266 |
| ybbJ | 0.788942338 | 0.047210867 |
